# Supplementary material for: Impact of PCSK9 monoclonal antibodies on circulating hs-CRP levels: a systematic review and meta-analysis of randomised controlled trials
Source: PubMed Central journal article supplement — BMJ Open. 2018 Oct 4;8(9):e022348. doi: 10.1136/bmjopen-2018-022348 (PMC6173233; doi:10.1136/bmjopen-2018-022348), 2018-10-04
Supplement: bmjopen-2018-022348.draft_revisions.pdf [file bmjopen-2018-022348.draft_revisions.pdf]

# BMJ Open

BMJ Open is committed to open peer review. As part of this commitment we make the peer review history of every article we publish publicly available.

When an article is published we post the peer reviewers' comments and the authors' responses online. We also post the versions of the paper that were used during peer review. These are the versions that the peer review comments apply to.

The versions of the paper that follow are the versions that were submitted during the peer review process. They are not the versions of record or the final published versions. They should not be cited or distributed as the published version of this manuscript.

BMJ Open is an open access journal and the full, final, typeset and author-corrected version of record of the manuscript is available on our site with no access controls, subscription charges or pay-per-view fees (<http://bmjopen.bmj.com>).

If you have any questions on BMJ Open's open peer review process please email [info.bmjopen@bmj.com](mailto:info.bmjopen@bmj.com)

# BMJ Open

## Impact of PCSK9-monoclonal antibodies on circulating hs-CRP levels: a systematic review and meta-analysis of randomized controlled trials

|                               |                                                                                                                                                                                                                                                                                                                                                                                                                                                                                                                                                                                                                                                                                                                                                                                                                                                                          |
|-------------------------------|--------------------------------------------------------------------------------------------------------------------------------------------------------------------------------------------------------------------------------------------------------------------------------------------------------------------------------------------------------------------------------------------------------------------------------------------------------------------------------------------------------------------------------------------------------------------------------------------------------------------------------------------------------------------------------------------------------------------------------------------------------------------------------------------------------------------------------------------------------------------------|
| Journal:                      | <i>BMJ Open</i>                                                                                                                                                                                                                                                                                                                                                                                                                                                                                                                                                                                                                                                                                                                                                                                                                                                          |
| Manuscript ID                 | bmjopen-2018-022348                                                                                                                                                                                                                                                                                                                                                                                                                                                                                                                                                                                                                                                                                                                                                                                                                                                      |
| Article Type:                 | Research                                                                                                                                                                                                                                                                                                                                                                                                                                                                                                                                                                                                                                                                                                                                                                                                                                                                 |
| Date Submitted by the Author: | 14-Feb-2018                                                                                                                                                                                                                                                                                                                                                                                                                                                                                                                                                                                                                                                                                                                                                                                                                                                              |
| Complete List of Authors:     | Cao, Ye-Xuan; State Key Laboratory of Cardiovascular Disease, Fu Wai Hospital, National Center for Cardiovascular Diseases, Chinese Academy of Medical Sciences, Peking Union Medical College<br>Li, Sha; State Key Laboratory of Cardiovascular Disease, Fu Wai Hospital, National Center for Cardiovascular Diseases, Chinese Academy of Medical Sciences, Peking Union Medical College, Division of Dyslipidemia<br>Liu, Hui-Hui; State Key Laboratory of Cardiovascular Disease, Fu Wai Hospital, National Center for Cardiovascular Diseases, Chinese Academy of Medical Sciences, Peking Union Medical College, Division of Dyslipidemia<br>Li, Jian-Jun; Division of Dyslipidemia, State Key Laboratory of Cardiovascular Disease, Fuwai Hospital, National Center for Cardiovascular Diseases, Chinese Academy of Medical Sciences, Peking Union Medical College |
| Keywords:                     | PCSK9, monoclonal antibody, hs-CRP, meta-analysis                                                                                                                                                                                                                                                                                                                                                                                                                                                                                                                                                                                                                                                                                                                                                                                                                        |
|                               |                                                                                                                                                                                                                                                                                                                                                                                                                                                                                                                                                                                                                                                                                                                                                                                                                                                                          |

SCHOLARONE™  
Manuscripts

Only

1  
2  
3 **BMJ Open**

2018-02-12

4  
5  
6  
7 **Title:** Impact of PCSK9-monoclonal antibodies on circulating hs-CRP levels: a systematic  
8 review and meta-analysis of randomized controlled trials  
9

10  
11  
12 **Running Title:** PCSK9-mAb and hs-CRP  
13

14  
15  
16  
17 **Authors:** Ye-Xuan Cao, MD\*, Sha Li, MD, PhD\*, Hui-Hui Liu, MD\*, Jian-Jun Li, MD, PhD\*  
18  
19

20  
21  
22  
23 **Affiliations:** \*Division of Dyslipidemia, State Key Laboratory of Cardiovascular Disease, Fu  
24 Wai Hospital, National Center for Cardiovascular Diseases, Chinese Academy of Medical  
25 Sciences, Peking Union Medical College, BeiLiShi Road 167, Beijing 100037, China.  
26  
27  
28

29  
30  
31  
32  
33 **Correspondence:** Professor Jian-Jun Li, MD, PhD, FESC, FACC. Division of Dyslipidemia,  
34 State Key Laboratory of Cardiovascular Disease, Fu Wai Hospital, National Center for  
35 Cardiovascular Diseases, Chinese Academy of Medical Sciences, Peking Union Medical  
36 College, BeiLiShi Road 167, Beijing 100037, China. Tel: 86+10+88396077; Fax:  
37 86+10+88396584. E-mail: [lijianjun938@126.com](mailto:lijianjun938@126.com).  
38  
39  
40  
41  
42  
43

44  
45  
46  
47 **Total word count:** 2882  
48

49  
50 **Number of tables/figures:** tables 1; figures 3  
51  
52  
53  
54  
55  
56  
57

## ABSTRACT

**Objective** To evaluate the potential effects of proprotein convertase subtilisin/kexin type 9 monoclonal antibody (PCSK9-mAb) on high-sensitivity C-reactive (hs-CRP) concentrations.

**Design** A systematic review and meta-analysis of randomized controlled trials.

**Data sources** PubMed, MEDLINE, The Cochrane Library databases, clinical trials registries websites and recent conferences were searched from inception to January 2018.

**Eligibility criteria for selecting studies** All randomized controlled trials that reported changes of hs-CRP were included.

**Results** Ten studies involving 4198 participants were identified. PCSK9-mAbs showed a slight efficacy in reducing hs-CRP (-0.04mg/L, 95%CI:-0.17 to 0.01), but no statistical difference was found. Subgroup analyses showed no significant effect when stratified by PCSK9-mAb types (Alirocumab:0.12mg/L, 95% CI:-0.18 to 0.43; Evolocumab:0.00 mg/L, 95% CI:-0.07 to 0.07; LY3015014:-0.48mg/L, 95% CI:-1.28 to 0.32; RG7652:0.35mg/L, 95% CI:-0.26 to 0.96), treatment duration ( $\leq 12$ w:0.00mg/L, 95% CI:-0.07 to 0.07;  $>12$ w:-0.11mg/L, 95% CI:-0.45 to -0.23), participant characteristics (familial hypercholesterolemia:0.00mg/L, 95% CI:-0.07 to 0.07; non-familial hypercholesterolemia:0.07mg/L, 95% CI:-0.12 to 0.26; mix:-0.48mg/L, 95%CI:-1.28 to 0.32) and treatment methods (monotherapy:0.00mg/L, -0.08 to 0.07; combination-therapy:-0.08mg/L, -0.37 to 0.21). Meta-regression analyses identified no significant linear correlation between baseline age ( $p=0.673$ ), sex ( $p=0.645$ ) and low-density lipoprotein cholesterol reduction ( $p=0.339$ ).

**Conclusions** Although previous study showed a slightly reduced effect of PCSK9-mAbs on hs-CRP, the results of this updated meta-analysis suggested that PCSK9-mAbs had no significant impact on circulating hs-CRP levels.

**Keywords:** PCSK9; monoclonal antibody; hs-CRP; meta-analysis

**Strengths and limitations of this study**

- This is a comprehensive systematic review and meta-analysis of randomized controlled trials, conducted following the Preferred Reporting Items for Systematic Reviews and Meta-Analyses statement.
- We used a broad search strategy and identified 10 studies that reported changes of high-sensitivity C-reactive during proprotein convertase subtilisin/kexin type 9 monoclonal antibody treatment.
- Studies with moderate heterogeneity and lack of individual level data.

## Introduction

Cardiovascular disease is the greatest burden of global health, which is characterized by atherosclerosis<sup>1</sup>. Atherosclerosis is a chronic and progressive inflammatory disease, including endothelial dysfunction, lipid accumulation in the arterial wall and leukocyte infiltration, which leads to luminal stenosis, plaque rupture and acute coronary syndrome (ACS)<sup>2</sup>. Apart from well-established dyslipidaemia theory, inflammation also plays an important role in the initiation and progression of atherosclerosis<sup>3</sup>. Recently, CANTOS trial reported that anti-inflammatory therapy by canakinumab, a therapeutic monoclonal antibody targeting interleukin-1 $\beta$  (IL-1 $\beta$ ), significantly reduced the primary cardiovascular end points<sup>4</sup>.

Hs-CRP (high-sensitivity C-reactive protein) is the most intensively investigated inflammatory biomarker and shows an extensive clinical application. Hs-CRP is an 11,800 Da molecular synthesized by hepatocytes in response to interleukin 6 (IL-6)<sup>5</sup>. Several studies revealed that hs-CRP concentration was relatively constant in an individual, making it an ideal inflammatory biomarker<sup>5</sup>. Increasing studies have confirmed that hs-CRP is a predictive factor for assessing the progression of atherosclerotic disease and future adverse cardiovascular events (CE)<sup>6,7</sup>. Moreover, previous studies also indicated that hs-CRP may have pro-inflammatory effects and play a direct role in progression of atherosclerosis<sup>8,9</sup>. Many studies demonstrated that administration of statins may modify hs-CRP and other pro-inflammatory cytokine concentrations with decreasing CEs<sup>10,11</sup>.

Proprotein convertase subtilisin/kexin type 9 (PCSK9), a 73-kDa protein secreted by liver, regulates the activity of low-density lipoprotein receptor (LDLR) expressing in hepatocellular surface<sup>12</sup>. Multiple studies revealed that PCSK9 binds to LDLR and increases its degradation to block the cholesterol homeostasis, resulting in elevated plasma low-density lipoprotein cholesterol (LDL-C) levels<sup>13,14</sup>. PCSK9 monoclonal antibody (PCSK9-mAb)

1  
2  
3 decreased LDL-C concentrations by up to 70% and reduced the rate of CEs<sup>15</sup>. Therefore,  
4 PCSK9-mAb has emerged as the most powerful lipid-lowering drugs currently. Although the  
5 effect of PCSK9 on LDL-C has been established, its role in inflammation has not been fully  
6 investigated. A number of experimental studies found that PCSK9 could enhance  
7 inflammatory reaction to promote the progression of atherosclerosis and down-regulated  
8 PCSK9 expression led to the reduction of inflammation<sup>16,17</sup>. A meta-analysis published two  
9 years ago found that PCSK9-mAbs had no effect on serum hs-CRP<sup>18</sup>. However, this  
10 meta-analysis did not perform sufficient subgroup analyses to our knowledge. Besides, a  
11 recent published study with limited sample size found that initial PCSK9 plasma levels are  
12 associated with hs-CRP levels in patients with ACS<sup>19</sup> and some kinds of PCSK9-mAbs  
13 showed a reduction in hs-CRP levels<sup>20</sup>. Hence, whether PCSK9-mAbs could decrease  
14 circulating hs-CRP levels should be intensively examined.

15  
16 To further explore the efficiency of PCSK9 inhibitors on serum hs-CRP levels, we  
17 performed this meta-analysis including all published randomized controlled trials (RCT)  
18 published till January 2018.

## 19 20 21 22 23 24 25 26 27 28 29 30 31 32 33 34 35 36 37 **Methods**

### 38 39 40 **Literature search**

41 The present study was designed according to the guidelines of the 2009 Preferred Reporting  
42 Items for Systematic Reviews and Meta Analyses (PRISMA) statement<sup>21</sup>. To identify all  
43 RCTs that assessed the effects of PCSK9-mAbs on circulating hs-CRP levels, we  
44 comprehensively searched PubMed, MEDLINE, and the Cochrane Library database up until  
45 January 2018. We also searched the clinical trials registries websites. The search terms we  
46 used included the following: (AMG145 or Evolocumab or REGN727 or SAR236553 or  
47 Alirocumab or RN316 or bococizumab or RG7652 or LY3015014 or PCSK9 antibody or  
48  
49  
50  
51  
52  
53  
54  
55  
56  
57  
58  
59  
60

1  
2  
3 anti-PCSK9) AND (randomized controlled trial OR randomized OR randomly). Meanwhile  
4  
5 manual search was performed for relevant studies including references lists, relevant review  
6  
7 articles and commentaries. No language restriction was used and non-English articles were  
8  
9 translated.

### 10 11 12 13 **Study selection**

14  
15 Original studies met the following criteria would be included: the design was phase 2 or  
16  
17 phase 3 double-blind RCTs with longer than 8 weeks treatment duration; human participants  
18  
19 were randomly assigned to PCSK9-mAbs group versus control group with or without other  
20  
21 lipid-lowering therapy; outcomes included percentage changes of hs-CRP from baseline.  
22  
23 Studies were excluded if they were duplicate publications, review articles, non-human studies,  
24  
25 observational studies, lack of adequate information on outcomes or lacking control group.  
26  
27 Two investigators (YC and SL) independently screened and selected the eligible studies.  
28  
29 Disagreements were resolved by discussion with a third investigator.  
30  
31  
32  
33  
34

### 35 **Data Extraction**

36  
37 A standardized extraction form was used to extract the following items by two investigators  
38  
39 (YC and HL) independently: trial name/first author, year of publication, type of intervention,  
40  
41 follow-up period, treatment duration, number of patients, participant characteristics,  
42  
43 background lipid-lowering therapy, types and doses of PCSK9-mAbs, LDL and hs-CRP  
44  
45 levels at baseline and changes. We included the final reported follow-up point if a trial  
46  
47 contains several time points. If necessary, further information was required from  
48  
49 correspondence author.  
50  
51  
52  
53

### 54 **Quality Assessment**



1  
2  
3 We used Cochrane Collaboration's tool and Jadad score to assess the data and the  
4 methodological quality of included RCTs. For Cochrane Collaboration's tool, the following  
5 items were performed: random sequence generation (selection bias), allocation concealment  
6 (selection bias), blinding of participants and personnel (performance bias), blinding of  
7 outcome assessment (detection bias), incomplete outcome data (attrition bias), selective  
8 reporting (reporting bias) and other sources of bias. The judgments were classified as 'low  
9 risk', 'high risk', and 'unclear risk' of bias. The 5-point Jadad score included the following  
10 items: basis of randomization (0 to 2 points), double blinding (0 to 2 points), and withdrawals  
11 and dropouts (0 to 1 points). Studies with a score  $\geq 3$  points are considered to be high quality.  
12 Two investigators (YC and HL) independently assessed the quality of each study.  
13 Disagreements were resolved by discussion with a third investigator.  
14  
15  
16  
17  
18  
19  
20  
21  
22  
23  
24  
25  
26  
27  
28

### 29 **Data Synthesis and Statistical Analysis**

30 All analyses were analyzed according to the intention-to-treat principle. For all efficacy  
31 outcomes, changes in hs-CRP concentrations were expressed as weighted mean difference  
32 (WMD) and 95% confidence interval (CI). All the data were standardized and expressed by  
33 mg/mL. Standard deviation could be calculated from CI, interquartile range or standard error  
34 according to formulas in the Cochrane Handbook for Systematic Reviews of Interventions if  
35 not reported.  
36  
37  
38  
39  
40  
41  
42  
43

44 Heterogeneity was assessed by the Cochran Q test and the  $I^2$  statistic, and we considered  
45  $I^2 < 25\%$  as representing low heterogeneity and  $I^2 > 75\%$  as representing at high heterogeneity.  
46 Outcomes were calculated by fixed-effects model under no or low to moderate inconsistency  
47 ( $I^2 < 50\%$ ); otherwise, the data was pooled based on a random-effects model. Subgroups were  
48 applied to reduce the heterogeneity if  $I^2 \geq 50\%$ , such as PCSK9-mAb types, treatment  
49 duration and participant characteristics. In order to explore the resource of heterogeneity,  
50  
51  
52  
53  
54  
55  
56  
57

1  
2  
3 sensitivity analysis was conducted by omitting studies in turn to evaluate the consistency of  
4 the results. Meta-regression analyses were performed to the contribution of participant  
5 characteristics and reductions in LDL-C concentrations. Publication bias was assessed with a  
6 funnel plot and Egger's test.  
7  
8  
9

10  
11 All analyses were conducted with Review Manager Version 5.3 (Copenhagen: The  
12 Nordic Cochrane Centre, The Cochrane Collaboration, Denmark) and Stata 14.0 (Stata  
13 Statistical Software: College Station, TX: Stata Corp LP). P value <0.05 was considered to be  
14 statistically significant.  
15  
16  
17  
18  
19

## 20 21 22 **Results**

### 23 **Study selection and Characteristics**

24 The initial search identified 575 articles. After screening the titles and abstracts, 339 were  
25 excluded and 236 studies were retrieved for full-text identification. We further excluded 135  
26 studies, of which 58 were pooled or meta-analysis, 2 studies were not RCTs and 13 was phase  
27 1 trials, 16 were open label trails and 42 without adequate information. Finally, ten  
28 studies<sup>20,22-30</sup> were included in this meta-analysis. Figure 1 shows flow diagram of selection  
29 process.  
30  
31  
32  
33  
34  
35  
36  
37  
38

39 These ten studies were published between 2012 and 2017 from different countries with  
40 low risk of bias, of which 5 were phase 2 studies and 5 were phase 3 studies (Table 1). In  
41 total, 4198 participants were included, comprising 2728 individuals in the PCSK9-mAb  
42 group and 1470 in the control group. Alirocumab (SAR236553/REGN72 7) was used in 4  
43 arms and 11 arms applied Evolocumab (AMG 145). Five arms managed LY3015014 and 2  
44 arms used RG7652. Participants of 3 studies were heterozygous familial  
45 hypercholesterolemia (HeFH), 1 study contained homozygous familial hypercholesterolemia  
46 (HoFH) patients, and the remaining 6 trials enrolled non-FH or hypercholesterolemia  
47  
48  
49  
50  
51  
52  
53  
54  
55  
56

1  
2  
3 individuals. Most of the treatment duration ranged from 12 to 24 weeks and the longest  
4  
5 treatment duration was 78 weeks. Apart from DESCARTES trial which co-administered with  
6  
7 atorvastatin, another 9 studies used PCSK9-mAb as monotherapy. Baseline characteristics,  
8  
9 including circulating hs-CRP levels, were similar between PCSK9-mAbs and control groups  
10  
11 within each study. The characteristics of these trials and participants are summarized in Table  
12  
13 1. All these studies had a relatively high quality evaluated by the Jadad score and low risk of  
14  
15 bias (online supplementary Table 1 and online supplementary Figure 1, 3 scores=5, 6  
16  
17 scores=4).

### 22 **Efficiency outcomes of PCSK9-mAbs on hs-CRP**

23  
24 A total of 4198 participants were included in the analysis of efficiency of PCSK9-mAbs on  
25  
26 plasma hs-CRP concentrations before and after treatment. When data were pooled,  
27  
28 PCSK9-mAbs showed a slight efficacy in reducing hs-CRP (WMD: -0.04mg/L, 95%CI: -0.17  
29  
30 to 0.01), but no statistical difference was found compared with control treatment (Figure 2).  
31  
32 There was a moderate heterogeneity between each study ( $I^2=57.4%$ ,  $P=0.0001$ ), so the  
33  
34 random-effects model was selected.  
35  
36

37  
38 To assess the potential discrepancy, we applied the subgroup analysis based on the  
39  
40 characteristics of trials and participants (Figure 3 and online supplementary Figures 2-5).  
41  
42 Although the efficiency of LY3015014 was a mild higher (-0.48 mg/L, 95% CI:-1.28 to 0.32),  
43  
44 there was no difference between these four antibodies (Alirocumab: 0.12 mg/L, 95% CI:  
45  
46 -0.18 to 0.43; Evolocumab: 0.00 mg/L, 95% CI: -0.07 to 0.07; RG7652: 0.35 mg/L, 95% CI:  
47  
48 -0.26 to 0.96). When studies were classified by treatment duration, the hs-CRP reduction  
49  
50 showed no difference in less than 12 weeks duration groups (0.00 mg/L, 95% CI: -0.07 to  
51  
52 0.07) and above 12 weeks duration groups (-0.11mg/L, 95% CI: -0.45 to -0.23). There was a  
53  
54 statistically non-significant reduction in circulating hs-CRP with use of PCSK9 antibodies  
55  
56

1  
2  
3 compared with control treatment when categorized to participant characteristics (FH: 0.00  
4 mg/L, 95% CI: -0.07 to 0.07; non-FH: 0.07 mg/L, 95% CI: -0.12 to 0.26; mix: -0.48 mg/L,  
5 95%CI: -1.28 to 0.32). The analysis stratified by treatment method also supported the results  
6  
7 that no differential effect of PCSK9-mAb therapy on plasma CRP concentrations was  
8  
9 observed (monotherapy: 0.00 mg/L, 95%CI: -0.08 to 0.07 vs combination-therapy: -0.08  
10  
11 mg/L, 95%CI: -0.37 to 0.21).  
12  
13  
14  
15

### 16 17 18 **Sensitivity analysis and publication bias**

19  
20 The sensitivity analysis for all outcomes in the comparison was conducted by gradually  
21  
22 removing each study, but the results did not change meaningfully (online supplementary  
23  
24 Figure 6). Neither funnel plots nor Egger's regression test ( $p=0.913$ ) showed publication bias  
25  
26 (online supplementary Figure 7).  
27  
28  
29  
30

### 31 **Meta-regression analyses**

32  
33 We used meta-regression analysis to assess the association between changes in hs-CRP and  
34  
35 baseline age, sex and average LDL changes (online supplementary Figure 8). No statistically  
36  
37 significant relationship between baseline age, sex and hs-CRP changes were observed.  
38  
39 Likewise, LDL lowering effects had no impact on hs-CRP lowering.  
40  
41  
42  
43

### 44 **Discussion**

45  
46 The results of this comprehensive meta-analysis, based on 10 RCTs encompassing 4198  
47  
48 participants, suggested that short-term PCSK9-mAb therapy had no impact on circulating  
49  
50 hs-CRP concentrations. In the subgroup analysis, we found no difference between  
51  
52 PCSK9-mAb types, treatment duration, participant characteristics and treatment methods.  
53  
54

55  
56 Atherosclerosis is a chronic progressive disorder and its pathophysiology is complex. In

1  
2  
3  
4 addition to well-established imbalanced lipid metabolism, growing evidence has suggested  
5  
6 that inflammation played a major role in the formation and progression of atherosclerosis,  
7  
8 including vasomotor dysfunction, endothelial cell injury, adhesion and transendothelial  
9  
10 migration of monocytes and plaque rupture<sup>2</sup>. Numerous pro-inflammatory cytokines, such as  
11  
12 tumor necrosis factor-alpha (TNF- $\alpha$ ), interleukin 1 (IL-1), intercellular cell adhesion  
13  
14 molecule-1 (ICAM-1), and CRP have been shown to drive the disease progression<sup>31</sup>.  
15  
16 However, most anti-inflammatory drugs showed no positive effect in reducing the burden of  
17  
18 atherosclerosis in human studies<sup>32</sup>. Fortunately, evidence from CATONS found that  
19  
20 canakinumab significantly reduced hs-CRP levels and cardiovascular outcomes after  
21  
22 follow-up of 3.7 years, which directly confirmed the inflammatory hypothesis<sup>4</sup>.  
23  
24  
25  
26  
27

28 A number of studies indicated that hs-CRP could independently predict major CEs<sup>6</sup>.  
29  
30 Framingham study found that men and women in the highest quartile of CRP respectively  
31  
32 had twice and three-times the risk of stroke compared with those in the lowest after more than  
33  
34 10-years follow-up<sup>33</sup>. NOMAS (the Northern Manhattan Study) reported that >3 mg/L CRP  
35  
36 was associated with a 1.7-fold increase in cardiovascular outcomes and a 1.55-fold increase  
37  
38 in mortality<sup>34</sup>. A recent study showed a positive association between sustained high exposure  
39  
40 to hs-CRP and CVD risk<sup>7</sup>. Furthermore, hs-CRP also plays a vital role in the development of  
41  
42 atherosclerosis. Zwaka et al<sup>8</sup> found that CRP enhanced the transformation from macrophages  
43  
44 to foam cells by increasing the uptake of native LDL. Previous studies also reported that CRP  
45  
46 impaired vasodilatation, inhibited the synthesis of nitric oxide synthase, and facilitated  
47  
48 adhesion of monocyte<sup>35,36</sup>. Many studies found that statin therapy may reduce hs-CRP and  
49  
50 other pro-inflammatory cytokine concentrations with decreasing CEs<sup>10,11</sup>. The JUPITER  
51  
52  
53  
54  
55  
56  
57  
58  
59  
60

1  
2  
3 study applied rosuvastatin on individuals with LDL-C levels below 130 mg/dl but with  
4  
5 hs-CRP levels  $\geq 2$  mg/l and found a significant reduction in all vascular events<sup>37</sup>. That is the  
6  
7 reason why we chose hs-CRP as an inflammatory biomarker to identify whether  
8  
9 PCSK9-mAb has an effect on inflammatory status.  
10  
11

12  
13 Although the relationship between PCSK9 and LDL-C was well-established, more and  
14  
15 more evidence demonstrated its function beyond lipids. In 2010, microarray gene expression  
16  
17 analysis suggested that PCSK9 affected not only cholesterol metabolism, but also  
18  
19 inflammation. Experimental studies indicated that PCSK9 could participate in vascular and  
20  
21 inflammation. Experimental studies indicated that PCSK9 could participate in vascular and  
22  
23 systemic inflammation<sup>16</sup>. PCSK9 enhanced the oxidized low-density lipoprotein (ox-LDL)  
24  
25 accumulation in macrophages by up-regulating the expression of CD36 and blocked  
26  
27 cholesterol efflux through lowering ATP-binding cassette transporter (ABCA1) and  
28  
29 ATP-binding cassette transporter G1 (ABCG1) levels<sup>38</sup>. In transgenic mice expressing human  
30  
31 PCSK9 gene, Tavori et al<sup>39</sup> observed that atherosclerosis lesion size and local Ly6C<sup>hi</sup>  
32  
33 monocytes, the precursors of pro-inflammatory M1 macrophages, significantly increased.  
34  
35 Clinical studies further supported this hypothesis. Li et al<sup>40</sup> found that serum PCSK9  
36  
37 concentrations were associated with white blood cell count independently in CAD patients,  
38  
39 indicating PCSK9 may be involved in the inflammation process. ATHEROREMO-IVUS  
40  
41 study reported a positive linearly association between PCSK9 levels and coronary plaque  
42  
43 inflammation, including amount of necrotic core tissue and plaque volume<sup>41</sup>. PCSK9  
44  
45 concentration was also reported to be a predictor for carotid atherosclerosis in asymptomatic  
46  
47 adults and for the incidence and severity of CAD independent of conventional cardiovascular  
48  
49 risk factors<sup>14,42</sup>.  
50  
51  
52  
53  
54  
55  
56  
57  
58  
59  
60

1  
2  
3  
4 Since previous studies showed that PCSK9 directly augmented inflammatory cytokines  
5  
6 expression and atherosclerotic lesion, PCSK9 inhibition may exert anti-inflammatory effects.  
7  
8 The levels of IL-1, IL-6, TNF- $\alpha$ , and PCSK9 synthesized by THP-1-derived macrophages  
9  
10 were increased after treated with ox-LDL and PCSK9 small interfering RNA reduced the  
11  
12 expression of these pro-inflammatory genes through nuclear factor kappa B (NF- $\kappa$ B)  
13  
14 Pathway<sup>43</sup>. In apoE<sup>-/-</sup> mice, PCSK9 silencing limited the development of atherosclerosis and  
15  
16 decreased the number of macrophages and the expression of vascular inflammation regulators  
17  
18 through TLR4/NF- $\kappa$ B signaling pathway<sup>44</sup>. Pro-inflammatory Ly6C<sup>hi</sup> monocytes and  
19  
20 ICAM-1, which enhances the adhesion to the vascular endothelium, were obviously reduced  
21  
22 after treatment with Alirocumab<sup>17</sup>. AT04A anti-PCSK9 vaccine also got the same results that  
23  
24 anti-PCSK9 therapy could reduce vascular inflammation<sup>45</sup>. Clinically, Bernelot et al<sup>46</sup> found  
25  
26 that after 24 weeks of treatment with PCSK9-mAbs, the migratory capacity of monocytes and  
27  
28 inflammatory responsiveness showed a significant reduction, and anti-inflammatory cytokine  
29  
30 interleukin-10 levels increased in FH patients, which supported the hypothesis that  
31  
32 PCSK9-mAb had an anti-inflammatory effect. However, in our study PCSK9 suggested no  
33  
34 effect on decreasing hs-CRP in both FH participants and non-FH individuals.  
35  
36  
37  
38  
39  
40  
41

42  
43 Statins are the cornerstone of cardiovascular drugs because of its pleiotropic effects,  
44  
45 including lipid-lowering and anti-inflammatory effect, which notably reduce CAD risks. The  
46  
47 CARE trial indicated that pravastatin decreased hs-CRP levels independent of LDL-C<sup>47</sup>.  
48  
49 AFCAPS/TexCAPs research also got the similar results that statin was clinically effective in  
50  
51 primary prevention of CAD events by reducing LDL-C and hs-CRP levels<sup>48</sup>. Interestingly,  
52  
53 unlike statins, although experimental and clinical studies showed that PCSK9 inhibition could  
54  
55  
56  
57  
58  
59  
60

1  
2  
3 reduce atherosclerotic inflammation, in our study PCSK9-mAbs had no significant impact on  
4  
5 plasma hs-CRP levels. Besides, the same results were also observed in combination of statins  
6  
7 and PCSK9-mAbs group. Although the results of previous meta-analysis published two years  
8  
9 ago consistent with ours, the methods of analyses including subgroup analysis were different  
10  
11 and they might be limited by small sample size and insufficient subgroup analyses. Although  
12  
13 the exact mechanism between statin and PCSK9-mAb on inflammation is unclear, it is  
14  
15 notable that the participants in statins therapy had high levels of hs-CRP at baseline, while, in  
16  
17 PCSK9 inhibition therapy, initial hs-CRP levels were at normal range in recruited individuals.  
18  
19 Besides, the effective observation of PCSK9-mAb on inflammatory marker in humans may  
20  
21 be limited by duration. The treatment duration and follow-up period is long in statin therapy,  
22  
23 but the longest follow-up of PCSK9-mAbs was 78 weeks. Furthermore, no confirmative  
24  
25 evidence has been found to decline CAD risk by reducing hs-CRP levels alone. Therefore,  
26  
27 although this meta-analysis indicated a non-effect of PCSK9 on hs-CRP, a large number of  
28  
29 data suggested that PCSK9 plays a vital role in atherosclerotic inflammation. More  
30  
31 experimental and clinical researches may be needed to fully understand the impact of  
32  
33 PCSK9-mAbs on CRP in the future.  
34  
35  
36  
37  
38  
39  
40  
41  
42  
43

#### 44 **Limitations**

45  
46 First, meta-analysis is a retrospective approach and based on trial level data but not  
47  
48 on individual level data. Second, study design, treatment duration, follow-up and baseline  
49  
50 characteristics were different in the studies included. Some studies had a statin run-in period  
51  
52 which would influence the final results. Third, moderate degree of heterogeneity was obvious  
53  
54 in several comparisons. However, there was no publication bias and the results were rather  
55  
56  
57  
58  
59  
60



1  
2  
3 consistent among different subgroups and sensitivity analyses. Fourth, some studies included  
4 in this meta-analysis did not provide adequate information about blinding of participants and  
5  
6  
7 personnel.  
8  
9

## 10 11 **Conclusions**

12  
13 In conclusion, the current evidence suggests that despite intense effect on lipid-lowering,  
14 PCSK9-mAbs have no significant impact on circulating hs-CRP concentrations. Hopefully,  
15  
16 more participants with elevated hs-CRP levels at baseline or with CAD will be recruited in  
17  
18 large, oncoming RCTs to explore whether PCSK9-mAbs have pleiotropic effects like statins.  
19  
20  
21  
22  
23  
24  
25  
26  
27  
28

## 29 **Acknowledgements**

30  
31 Not any.  
32  
33  
34

## 35 **Contributors**

36  
37 JJL contributed to conception and design, acquisition, analysis, and interpretation, and  
38  
39 critically revised the manuscript. YXC contributed to design, acquisition, analysis, and  
40  
41 interpretation and drafted the manuscript. SL contributed to acquisition, analysis, and  
42  
43 critically revised the manuscript. HHL contributed to analysis, interpretation and critically  
44  
45 revised the manuscript. All the authors read and approved the final version of the manuscript.  
46  
47  
48  
49

## 50 **Funding**

51  
52 This work was partially supported by the Capital Health Development Fund (201614035) and  
53  
54 CAMS Major Collaborative Innovation Project (2016-I2M-1-011) awarded to Dr. Jian-Jun Li,  
55  
56

1  
2  
3 MD, PhD. The sponsors had no role in the decision to conduct the meta-analyses, data  
4 analysis, or reporting of the results.  
5  
6  
7

8  
9 **Competing interests:** None declared.  
10

11  
12  
13 **Patient consent:** Not required.  
14

15  
16  
17 **Ethics approval:** This research is exempt from ethical approval.  
18

19  
20  
21 **Data sharing statement:** No additional data available.  
22

## 23 24 25 26 **Reference**

- 27  
28  
29 1. Mathers CD, Loncar D. Projections of global mortality and burden of disease from 2002 to  
30 2030. *PLoS Med.* 2006;3:e442.  
31
- 32  
33  
34 2. Ross R. Atherosclerosis--an inflammatory disease. *N Engl J Med.* 1999;340:115-26.  
35
- 36  
37  
38 3. Packard RR, Libby P. Inflammation in atherosclerosis: from vascular biology to biomarker  
39 discovery and risk prediction. *Clin Chem.* 2008;54:24-38.  
40
- 41  
42  
43 4. Ridker PM, Everett BM, Thuren T, *et al.* Antiinflammatory Therapy with Canakinumab for  
44 Atherosclerotic Disease. *N Engl J Med.* 2017;377:1119-31.  
45
- 46  
47  
48 5. Li JJ, Fang CH. C-reactive protein is not only an inflammatory marker but also a direct cause  
49 of cardiovascular diseases. *Med Hypotheses.* 2004;62:499-506.  
50
- 51  
52  
53 6. Li JJ, Li S, Zhang Y, *et al.* Proprotein Convertase Subtilisin/Kexin type 9, C-Reactive Protein,  
54 Coronary Severity, and Outcomes in Patients With Stable Coronary Artery Disease: A  
55 Prospective Observational Cohort Study. *Medicine.* 2015;94:e2426.  
56

- 1  
2  
3  
4 7. Wang A, Liu J, Li C, *et al.* Cumulative Exposure to High-Sensitivity C-Reactive Protein  
5 Predicts the Risk of Cardiovascular Disease. *J Am Heart Assoc.* 2017; 6: e005610.  
6  
7
- 8  
9 8. Zwaka TP, Hombach V, Torzewski J. C-reactive protein-mediated low density lipoprotein  
10 uptake by macrophages: implications for atherosclerosis. *Circulation.* 2001;103:1194-7.  
11  
12
- 13  
14 9. Zhang YX, Cliff WJ, Schoefer GI, *et al.* Coronary C-reactive protein distribution: its relation to  
15 development of atherosclerosis. *Atherosclerosis.* 1999;145:375-9.  
16  
17
- 18  
19 10. Li JJ, Fang CH. Effects of 4 weeks of atorvastatin administration on the antiinflammatory  
20 cytokine interleukin-10 in patients with unstable angina. *Clin Chem.* 2005;51:1735-8.  
21  
22
- 23  
24 11. Li JJ, Li YS, Fang CH, *et al.* Effects of simvastatin within two weeks on anti-inflammatory  
25 cytokine interleukin 10 in patients with unstable angina. *Heart.* 2006;92:529-30.  
26  
27
- 28  
29 12. Cui CJ, Li S, Li JJ. PCSK9 and its modulation. *Clin Chim Acta.* 2015;440:79-86.  
30  
31
- 32  
33 13. Li S, Li JJ. PCSK9: A key factor modulating atherosclerosis. *J Atheroscler Thromb.*  
34 2015;22:221-30.  
35  
36
- 37  
38 14. Li S, Zhang Y, Xu RX, *et al.* Proprotein convertase subtilisin-kexin type 9 as a biomarker for  
39 the severity of coronary artery disease. *Ann Med.* 2015;47:386-93.  
40  
41
- 42  
43 15. Roth EM, McKenney JM, Hanotin C, *et al.* Atorvastatin with or without an antibody to  
44 PCSK9 in primary hypercholesterolemia. *N Engl J Med.* 2012;367:1891-900.  
45  
46
- 47  
48 16. Giunzioni I, Tavori H, Covarrubias R, *et al.* Local effects of human PCSK9 on the  
49 atherosclerotic lesion. *J Pathol.* 2016;238:52-62.  
50  
51
- 52  
53 17. Kuhnast S, van der Hoorn JW, Pieterman EJ, *et al.* Alirocumab inhibits atherosclerosis,  
54 improves the plaque morphology, and enhances the effects of a statin. *J Lipid Res.*  
55 2014;55:2103-12.  
56  
57

- 1  
2  
3  
4  
5  
6  
7  
8  
9  
10  
11  
12  
13  
14  
15  
16  
17  
18  
19  
20  
21  
22  
23  
24  
25  
26  
27  
28  
29  
30  
31  
32  
33  
34  
35  
36  
37  
38  
39  
40  
41  
42  
43  
44  
45  
46  
47  
48  
49  
50  
51  
52  
53  
54  
55  
56  
57  
58  
59  
60
18. Sahebkar A, Di Giosia P, Stamerra CA, *et al.* Effect of monoclonal antibodies to PCSK9 on high-sensitivity C-reactive protein levels: a meta-analysis of 16 randomized controlled treatment arms. *Br J Clin Pharmacol.* 2016;81:1175-90.
  19. Gencer B, Montecucco F, Nanchen D, *et al.* Prognostic value of PCSK9 levels in patients with acute coronary syndromes. *Eur Heart J.* 2016;37:546-53.
  20. Kastelein JJ, Nissen SE, Rader DJ, *et al.* Safety and efficacy of LY3015014, a monoclonal antibody to proprotein convertase subtilisin/kexin type 9 (PCSK9): a randomized, placebo-controlled Phase 2 study. *Eur Heart J.* 2016;37:1360-9.
  21. Moher D, Shamseer L, Clarke M, *et al.* Preferred reporting items for systematic review and meta-analysis protocols (PRISMA-P) 2015 statement. *Syst Rev.* 2015;4:1.
  22. Raal F, Scott R, Somaratne R, *et al.* Low-density lipoprotein cholesterol-lowering effects of AMG 145, a monoclonal antibody to proprotein convertase subtilisin/kexin type 9 serine protease in patients with heterozygous familial hypercholesterolemia: the Reduction of LDL-C with PCSK9 Inhibition in Heterozygous Familial Hypercholesterolemia Disorder (RUTHERFORD) randomized trial. *Circulation.* 2012;126:2408-17.
  23. Raal FJ, Stein EA, Dufour R, *et al.* PCSK9 inhibition with evolocumab (AMG 145) in heterozygous familial hypercholesterolaemia (RUTHERFORD-2): a randomised, double-blind, placebo-controlled trial. *Lancet.* 2015;385:331-40.
  24. Stein EA, Gipe D, Bergeron J, *et al.* Effect of a monoclonal antibody to PCSK9, REGN727/SAR236553, to reduce low-density lipoprotein cholesterol in patients with heterozygous familial hypercholesterolaemia on stable statin dose with or without ezetimibe therapy: a phase 2 randomised controlled trial. *Lancet.* 2012;380:29-36.

- 1  
2  
3  
4 25. Blom DJ, Hala T, Bolognese M, *et al.* A 52-week placebo-controlled trial of evolocumab in  
5  
6 hyperlipidemia. *N Engl J Med.* 2014;370:1809-19.  
7  
8  
9 26. Stroes E, Colquhoun D, Sullivan D, *et al.* Anti-PCSK9 antibody effectively lowers cholesterol  
10  
11 in patients with statin intolerance: the GAUSS-2 randomized, placebo-controlled phase 3  
12  
13 clinical trial of evolocumab. *J Am Coll Cardiol.* 2014;63:2541-2548.  
14  
15  
16 27. Raal FJ, Honarpour N, Blom DJ, *et al.* Inhibition of PCSK9 with evolocumab in homozygous  
17  
18 familial hypercholesterolaemia (TESLA Part B): a randomised, double-blind,  
19  
20 placebo-controlled trial. *Lancet.* 2015;385:341-50.  
21  
22  
23 28. Cannon CP, Cariou B, Blom D, *et al.* Efficacy and safety of alirocumab in high cardiovascular  
24  
25 risk patients with inadequately controlled hypercholesterolaemia on maximally tolerated  
26  
27 doses of statins: the ODYSSEY COMBO II randomized controlled trial. *Eur Heart J.*  
28  
29 2015;36:1186-94.  
30  
31  
32  
33 29. Nicholls SJ, Puri R, Anderson T, *et al.* Effect of Evolocumab on Progression of Coronary  
34  
35 Disease in Statin-Treated Patients: The GLAGOV Randomized Clinical Trial. *JAMA.*  
36  
37 2016;316:2373-84.  
38  
39  
40 30. Baruch A, Mosesova S, Davis JD, *et al.* Effects of RG7652, a Monoclonal Antibody Against  
41  
42 PCSK9, on LDL-C, LDL-C Subfractions, and Inflammatory Biomarkers in Patients at High  
43  
44 Risk of or With Established Coronary Heart Disease (from the Phase 2 EQUATOR Study).  
45  
46  
47  
48 *Am J Cardiol.* 2017;119:1576-83.  
49  
50  
51 31. Wong BW, Meredith A, Lin D, *et al.* The biological role of inflammation in atherosclerosis.  
52  
53 *Can J Cardiol.* 2012;28:631-41.  
54  
55  
56 32. Ridker PM, Cushman M, Stampfer MJ, *et al.* Inflammation, aspirin, and the risk of  
57  
58  
59  
60

- 1  
2  
3 cardiovascular disease in apparently healthy men. *N Engl J Med.* 1997; 336:973-9.  
4  
5  
6 33. Rost NS, Wolf PA, Kase CS, *et al.* Plasma concentration of C-reactive protein and risk of  
7  
8 ischemic stroke and transient ischemic attack: the Framingham study. *Stroke.* 2001;32:2575-9.  
9  
10  
11 34. Cesari M, Penninx BW, Newman AB, *et al.* Inflammatory markers and onset of  
12  
13 cardiovascular events: results from the Health ABC study. *Circulation.* 2003;108:2317-22.  
14  
15  
16 35. Li L, Roumeliotis N, Sawamura T, *et al.* C-reactive protein enhances LOX-1 expression in  
17  
18 human aortic endothelial cells: relevance of LOX-1 to C-reactive protein-induced endothelial  
19  
20 dysfunction. *Circ Res.* 2004;95:877-83.  
21  
22  
23 36. Paffen E, DeMaat MP. C-reactive protein in atherosclerosis: A causal factor? *Cardiovasc Res.*  
24  
25 2006;71:30-9.  
26  
27  
28 37. Ridker PM, Danielson E, Fonseca FA, *et al.* Rosuvastatin to prevent vascular events in men  
29  
30 and women with elevated C-reactive protein. *N Engl J Med.* 2008;359:2195-207.  
31  
32  
33 38. Zhou X, He W, Huang Z, *et al.* Genetic deletion of low density lipoprotein receptor impairs  
34  
35 sterol-induced mouse macrophage ABCA1 expression. A new SREBP1-dependent  
36  
37 mechanism. *J Biol Chem.* 2008;283:2129-38.  
38  
39  
40 39. Tavori H, Giunzioni I, Predazzi IM, *et al.* Human PCSK9 promotes hepatic lipogenesis and  
41  
42 atherosclerosis development via apoE- and LDLR-mediated mechanisms. *Cardiovasc Res.*  
43  
44 2016;110:268-78.  
45  
46  
47 40. Li S, Guo YL, Xu RX, *et al.* Association of plasma PCSK9 levels with white blood cell count  
48  
49 and its subsets in patients with stable coronary artery disease. *Atherosclerosis.*  
50  
51 2014;234:441-445.  
52  
53  
54  
55 41. Cheng JM, Oemrawsingh RM, Garcia-Garcia HM, *et al.* PCSK9 in relation to coronary  
56  
57

- 1  
2  
3 plaque inflammation: Results of the ATHEROREMO-IVUS study. *Atherosclerosis*.  
4  
5  
6 2016;248:117-22.  
7
- 8 42. Chan DC, Pang J, McQuillan BM, *et al*. Plasma Proprotein Convertase Subtilisin Kexin Type  
9  
10 9 as a Predictor of Carotid Atherosclerosis in Asymptomatic Adults. *Heart Lung*  
11  
12 *Circ*.2016;25:520-5.  
13  
14
- 15 43. Tang Z, Jiang L, Peng J, *et al*. PCSK9 siRNA suppresses the inflammatory response induced  
16  
17 by oxLDL through inhibition of NF-kappaB activation in THP-1-derived macrophages. *Int J*  
18  
19 *Mol Med*. 2012;30:931-8.  
20  
21
- 22 44. Tang ZH, Peng J, Ren Z, *et al*. New role of PCSK9 in atherosclerotic inflammation promotion  
23  
24 involving the TLR4/NF-kappaB pathway. *Atherosclerosis*. 2017;262:113-22.  
25  
26
- 27 45. Landlinger C, Pouwer MG, Juno C, *et al*. The AT04A vaccine against proprotein convertase  
28  
29 subtilisin/kexin type 9 reduces total cholesterol, vascular inflammation, and atherosclerosis in  
30  
31 APOE\*3Leiden.CETP mice. *Eur Heart J*.2017;38:2499-507.  
32  
33
- 34 46. Bernelet Moens SJ, Neele AE, Kroon J, *et al*. PCSK9 monoclonal antibodies reverse the  
35  
36 pro-inflammatory profile of monocytes in familial hypercholesterolaemia. *Eur Heart J*.  
37  
38 2017;38:1584-93.  
39  
40
- 41 47. Ridker PM, Rifai N, Pfeffer MA, *et al*. Inflammation, pravastatin, and the risk of coronary  
42  
43 events after myocardial infarction in patients with average cholesterol levels. Cholesterol and  
44  
45 Recurrent Events (CARE) Investigators. *Circulation*. 1998;98:839-44.  
46  
47
- 48 48. Ridker PM, Rifai N, Clearfield M, *et al*. Measurement of C-reactive protein for the targeting  
49  
50 of statin therapy in the primary prevention of acute coronary events. *N Engl J Med*.  
51  
52 2001;344:1959-65.  
53  
54  
55  
56  
57  
58  
59  
60

## Tables

**Table 1.** Study characteristics of included randomized controlled trials.

| Study            | Year | Phase | Inclusion criteria | Patients N | Arm | Mean hs-CRP at baseline mg/L | Mean age (years) | Male % | % LDL-C reduction | Drugs/control                         | Treatment duration | Jadad Score |
|------------------|------|-------|--------------------|------------|-----|------------------------------|------------------|--------|-------------------|---------------------------------------|--------------------|-------------|
| RUTHERFORD       | 2012 | II    | HeFH               | 167        | (1) | 1.09±1.37                    | 47.6             | 54.5   | 42.7              | E:350mg/PBO, Q4W                      | 12W                | 5           |
|                  |      |       |                    |            | (2) | 1.07±1.24                    | 51.8             | 62.5   | 55.2              | E:420mg/PBO, Q4W                      | 12W                |             |
| Stein EA 2012    | 2012 | II    | HeFH               | 77         | (1) | 1.40±1.78                    | 56.3             | 81.3   | 67.9              | A:150mg /PBO, Q2W                     | 12W                | 5           |
|                  |      |       |                    |            | (2) | 0.60±0.82                    | 51.3             | 60.0   | 28.9              | A:150mg /PBO, Q4W                     | 12W                |             |
|                  |      |       |                    |            | (3) | 0.70±1.48                    | 52.9             | 56.3   | 31.5              | A:200mg /PBO, Q4W                     | 12W                | 5           |
|                  |      |       |                    |            | (4) | 0.70±0.59                    | 54.3             | 46.7   | 42.5              | A:300mg /PBO, Q4W                     | 12W                |             |
| DESCARTES        | 2014 | II    | HC                 | 894        | (1) | 2.00±3.70                    | 50.7             | 47.3   | 51.5              | E:420 mg/ PBO, Q4W                    | 52W                | 5           |
|                  |      |       |                    |            | (2) | 1.00±1.48                    | 57.2             | 42.9   | 54.7              | E:420 mg+ATV10 mg/ PBO, Q4W           | 52W                |             |
|                  |      |       |                    |            | (3) | 1.00±1.48                    | 57.8             | 52.4   | 46.7              | E:420 mg+ATV80 mg/ PBO, Q4W           | 52W                |             |
|                  |      |       |                    |            | (4) | 1.00±1.48                    | 54.2             | 55.6   | 46.8              | E:420 mg+ATV80 mg+ Eze10mg / PBO, Q4W | 52W                |             |
| GAUSS-2          | 2014 | III   | HC                 | 307        | (1) | 1.40±2.00                    | 61.0             | 55.3   | 56.1              | E:140 mg/ Eze, Q2W                    | 12W                | 4           |
|                  |      |       |                    |            | (2) | 1.80±1.78                    | 63.0             | 54.9   | 52.6              | E:420 mg/ Eze, Q4W                    | 12W                |             |
| RUTHERFORD-2     | 2014 | III   | HeFH               | 329        | (1) | 0.92±1.03                    | 52.6             | 40.0   | 61.3              | E:140 mg /PBO,Q2W                     | 12W                | 4           |
|                  |      |       |                    |            | (2) | 1.04±1.24                    | 51.9             | 41.8   | 55.7              | E:420 mg /PBO,Q4W                     | 12W                |             |
| TESLA Part B     | 2014 | III   | HoFH               | 49         |     | 0.70±1.04                    | 31.0             | 51.5   | 23.1              | E:140 mg /PBO, Q4W                    | 12W                | 4           |
| ODYSSEY COMBO II | 2015 | III   | HC                 | 720        | (1) | 3.58±7.78                    | 61.7             | 75.2   | 50.6              | A: 75mg /Eze, Q2W                     | 24W                | 4           |
|                  |      |       |                    |            | (2) | 3.58±7.78                    | 61.7             | 75.2   | 51.8              | A: 75mg /Eze, Q2W                     | 52W                |             |
| GLAGOV           | 2016 | III   | HC                 | 968        |     | 1.60±1.93                    | 59.8             | 72.1   | 34.6              | E:420 mg /PBO, Q4W                    | 78W                | 4           |
| Kastelein 2016   | 2016 | II    | HC                 | 519        | (1) | 1.03±1.41                    | 57.2             | 51.7   | 14.9              | LY:20mg/PBO, Q4W                      | 16W                | 4           |
|                  |      |       |                    |            | (2) | 1.34±1.11                    | 57.1             | 52.3   | 40.5              | LY:120mg/PBO, Q4W                     | 16W                |             |



|         |      |    |    |     |     |           |      |      |      |                    |     |   |
|---------|------|----|----|-----|-----|-----------|------|------|------|--------------------|-----|---|
|         |      |    |    |     | (3) | 1.63±1.78 | 59.7 | 54.7 | 50.5 | LY:300mg /PBO, Q4W | 16W |   |
|         |      |    |    |     | (4) | 1.39±1.70 | 59.6 | 58.1 | 14.9 | LY:100mg /PBO, Q8W | 16W |   |
|         |      |    |    |     | (5) | 1.10±1.63 | 58.7 | 50.6 | 37.1 | LY:300mg /PBO, Q8W | 16W |   |
| EQUATOR | 2017 | II | HC | 168 | (1) | 1.60±2.70 | 65.0 | 57.9 | 23.3 | RG:400mg/PBO, Q4W  | 24W | 4 |
|         |      |    |    |     | (2) | 2.00±5.90 | 64.0 | 51.0 | 44.3 | RG:800mg /PBO,Q8w  | 24W |   |

Data presented as mean±SD; LDL-C, low density lipoprotein-cholesterol; hs-CRP, hypersensitive C reactive protein; HC, hypercholesterolemia; HeFH, heterozygous familial hypercholesterolemia; HoFH, homozygous familial hypercholesterolemia; E, Evolocumab; A, Alirocumab; LY: LY3015014; RG, RG7652; PBO, placebo; ATV, atorvastatin; Eze, ezetimibe; W, weeks; Q2W, every 2 weeks; Q4W, every 4 weeks. N, number; SD, standard deviation.

For peer review only

1  
2  
3  
4 **Figure legends**  
5

6 **Figure 1.** Flow diagram of selection of studies.  
7  
8

9  
10  
11 **Figure 2.** Forest plots depicting the effect of PCSK9-mAbs on hs-CRP.

12 CI=confidence interval, PCSK9-mAbs=PCSK9 monoclonal antibodies, hs-CRP= hypersensitive  
13 C-reactive protein  
14  
15

16  
17  
18  
19 **Figure 3.** Subgroup analyses of the effect of PCSK9-mAbs on hs-CRP.

20 CI=confidence interval. PCSK9-mAb=PCSK9 monoclonal antibody. hs-CRP= hypersensitive  
21 C-reactive protein. FH= familial hypercholesterolemia. non-FH= non-familial hypercholesterolemia.  
22  
23  
24  
25  
26  
27  
28  
29  
30  
31  
32  
33  
34  
35  
36  
37  
38  
39  
40  
41  
42  
43  
44  
45  
46  
47  
48  
49  
50  
51  
52  
53  
54  
55  
56  
57  
58  
59  
60

1  
2  
3  
4  
5  
6  
7  
8  
9  
10  
11  
12  
13  
14  
15  
16  
17  
18  
19  
20  
21  
22  
23  
24  
25  
26  
27  
28  
29  
30  
31  
32  
33  
34  
35  
36  
37  
38  
39  
40  
41  
42  
43  
44  
45  
46  
47  
48  
49  
50  
51  
52  
53  
54  
55  
56  
57  
58  
59  
60

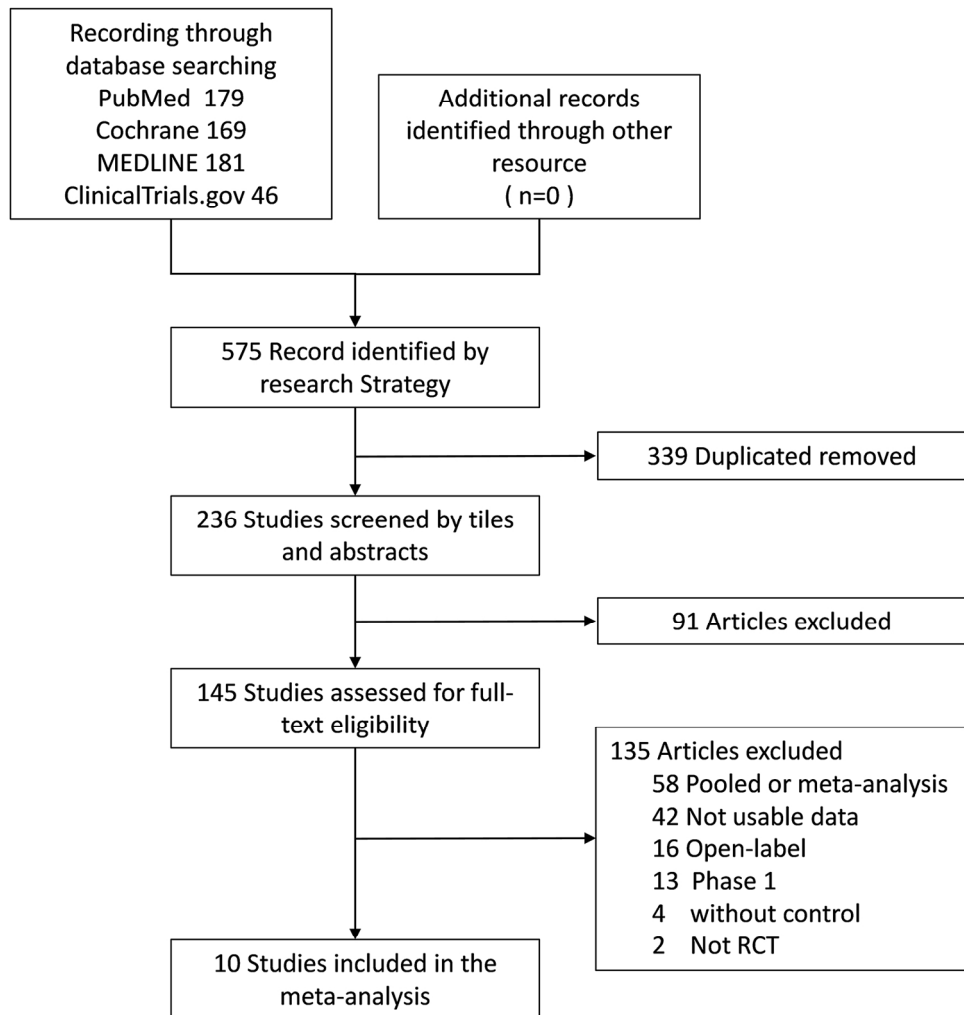

Figure 1. Flow diagram of selection of studies.

153x159mm (300 x 300 DPI)

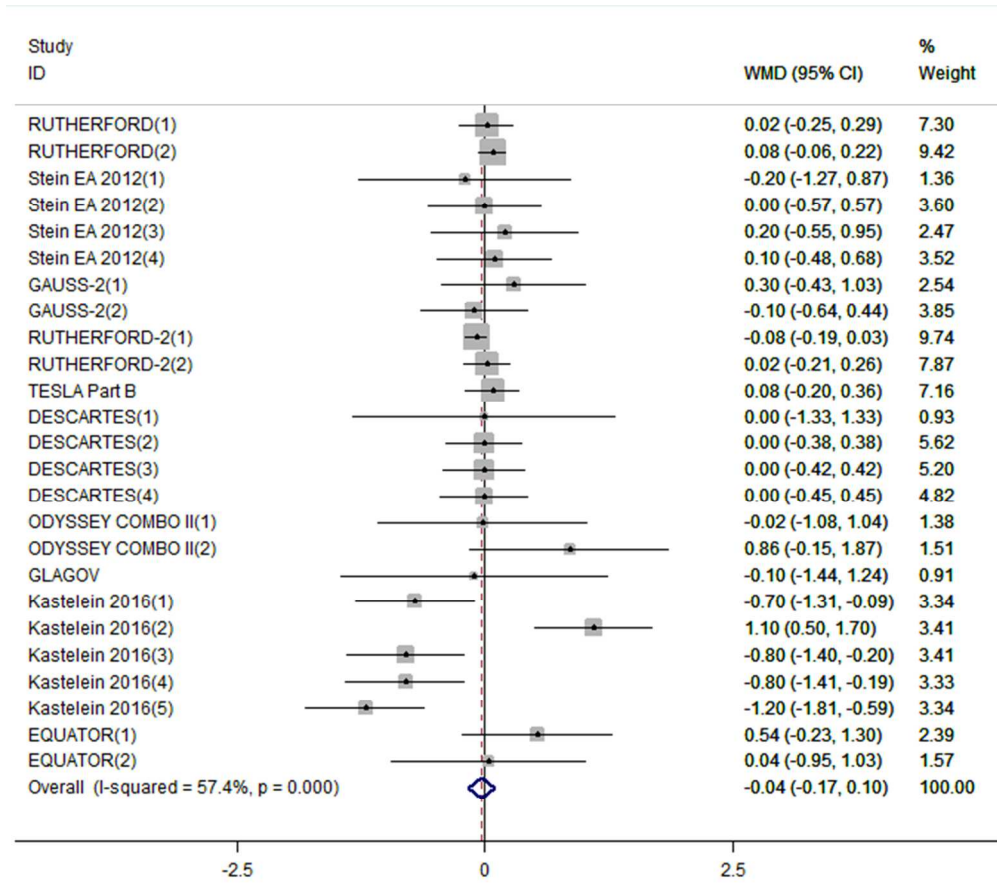

Figure 2. Forest plots depicting the effect of PCSK9-mAbs on hs-CRP. CI=confidence interval, PCSK9-mAbs=PCSK9 monoclonal antibodies, hs-CRP= hypersensitive C-reactive protein

238x213mm (300 x 300 DPI)

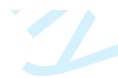

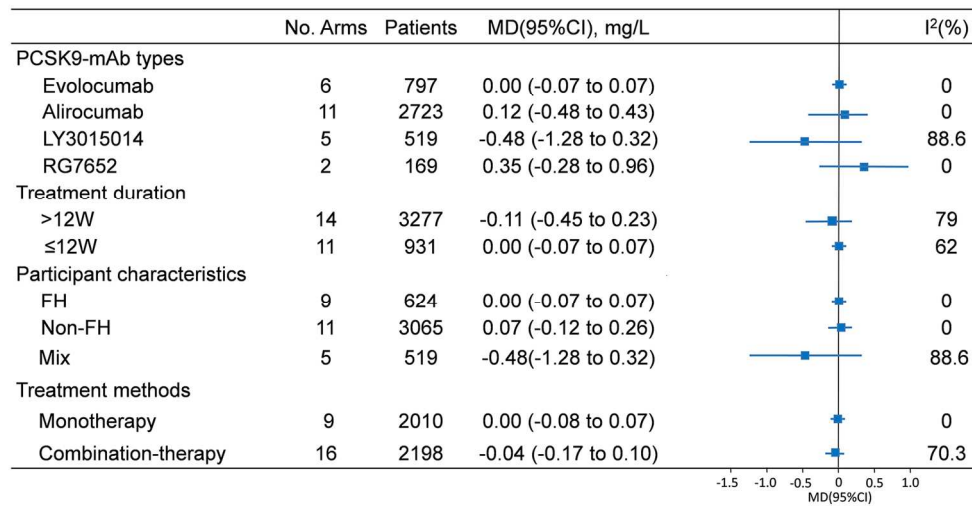

Figure 3. Subgroup analyses of the effect of PCSK9-mAbs on hs-CRP.  
 CI=confidence interval. PCSK9-mAb=PCSK9 monoclonal antibody. hs-CRP= hypersensitive C-reactive protein. FH= familial hypercholesterolemia. non-FH= non-familial hypercholesterolemia.

256x133mm (300 x 300 DPI)

## Supplementary material

**Supplemental Table 1.** Quality assessment of included studies using the Jadad scale

| Studies          | Representation of randomization | Appropriateness of method for randomization | Representation of double blinding | Appropriateness of method for double blinding | Representation of withdrawals | Total Score |
|------------------|---------------------------------|---------------------------------------------|-----------------------------------|-----------------------------------------------|-------------------------------|-------------|
| RUTHERFORD       | 1                               | 1                                           | 1                                 | 1                                             | 1                             | 5           |
| Stein EA 2012    | 1                               | 1                                           | 1                                 | 1                                             | 1                             | 5           |
| DESCARTES        | 1                               | 1                                           | 1                                 | 1                                             | 1                             | 5           |
| GAUSS-2          | 1                               | 1                                           | 1                                 | 0                                             | 1                             | 5           |
| RUTHERFORD-2     | 1                               | 1                                           | 1                                 | 0                                             | 1                             | 4           |
| TESLA Part B     | 1                               | 1                                           | 1                                 | 0                                             | 1                             | 4           |
| ODYSSEY COMBO II | 1                               | 1                                           | 1                                 | 0                                             | 1                             | 4           |
| GLAGOV           | 1                               | 1                                           | 1                                 | 0                                             | 1                             | 4           |
| Kastelein 2016   | 1                               | 1                                           | 1                                 | 0                                             | 1                             | 4           |
| EQUATOR          | 1                               | 1                                           | 1                                 | 0                                             | 1                             | 4           |

**Representation of randomization:**0, not randomized or inappropriate method of randomization; 1, the study was described as randomized.

**Appropriateness of method for randomization:** 0, no information about the method of randomization;1, the method of randomization was described and it was appropriate.

**Representation of double blinding:** 0, no blind or inappropriate method of blinding; 1, the study was described as double blinding.

**Appropriateness of method for double blinding:** 0, no information about the method of double blinding;1, the method of double blinding was described and it was appropriate.

**Withdrawals and dropouts:**0, not describe the follow-up; 1, a description of withdrawals and dropouts.

Supplementary Figure 1. Evaluation of risk of bias in the studies.

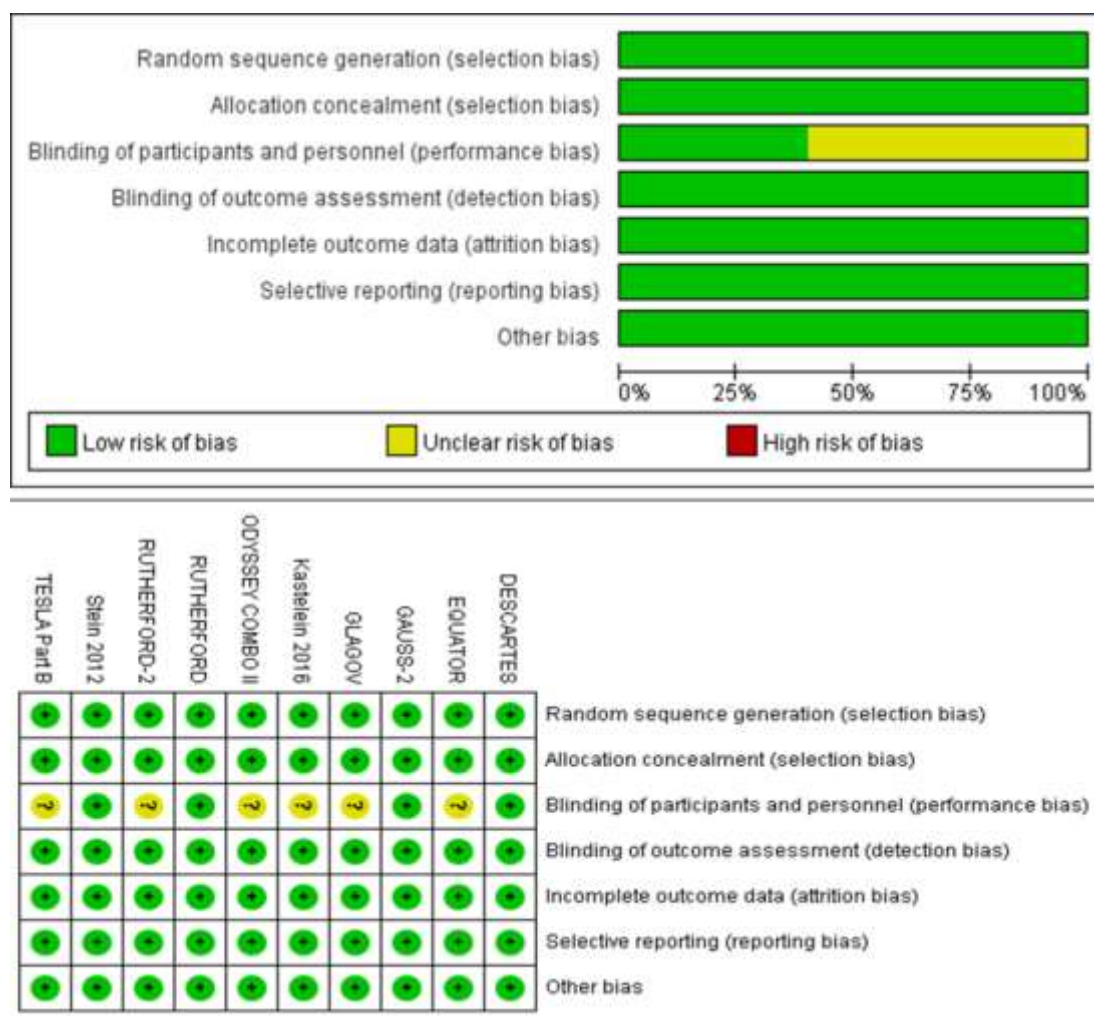

View Only

**Supplementary Figure 2.** Pooled analysis for hs-CRP stratified by PCSK9-mAb types.

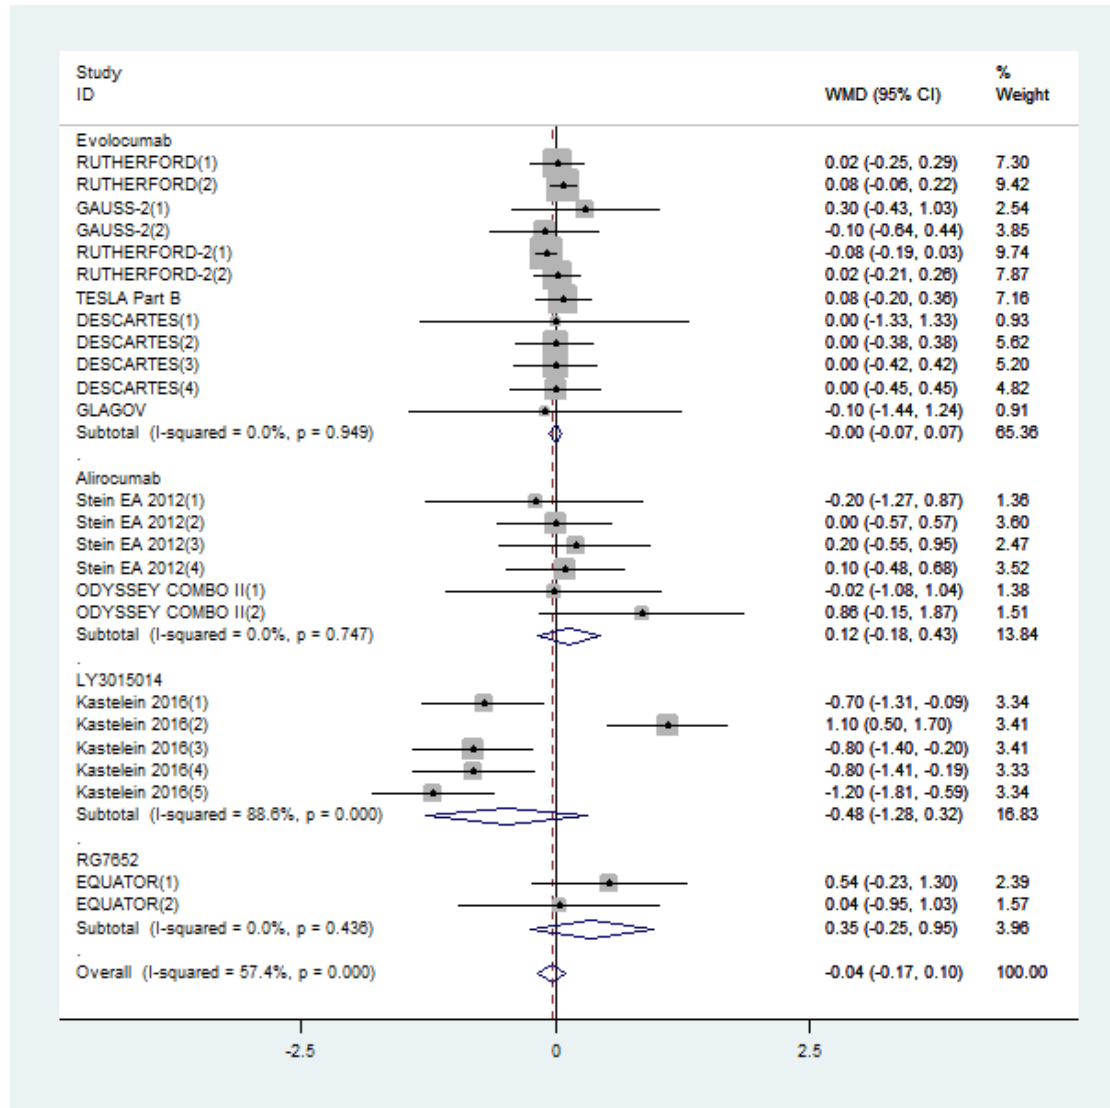

WMD= weighted mean difference, CI = confidence interval, PCSK9-mAb= proprotein convertase subtilisin/kexin type 9 monoclonal antibody, hs-CRP=hypersensitive C-reactive protein



Supplementary Figure 3. Pooled analysis for hs-CRP stratified by treatment durations.

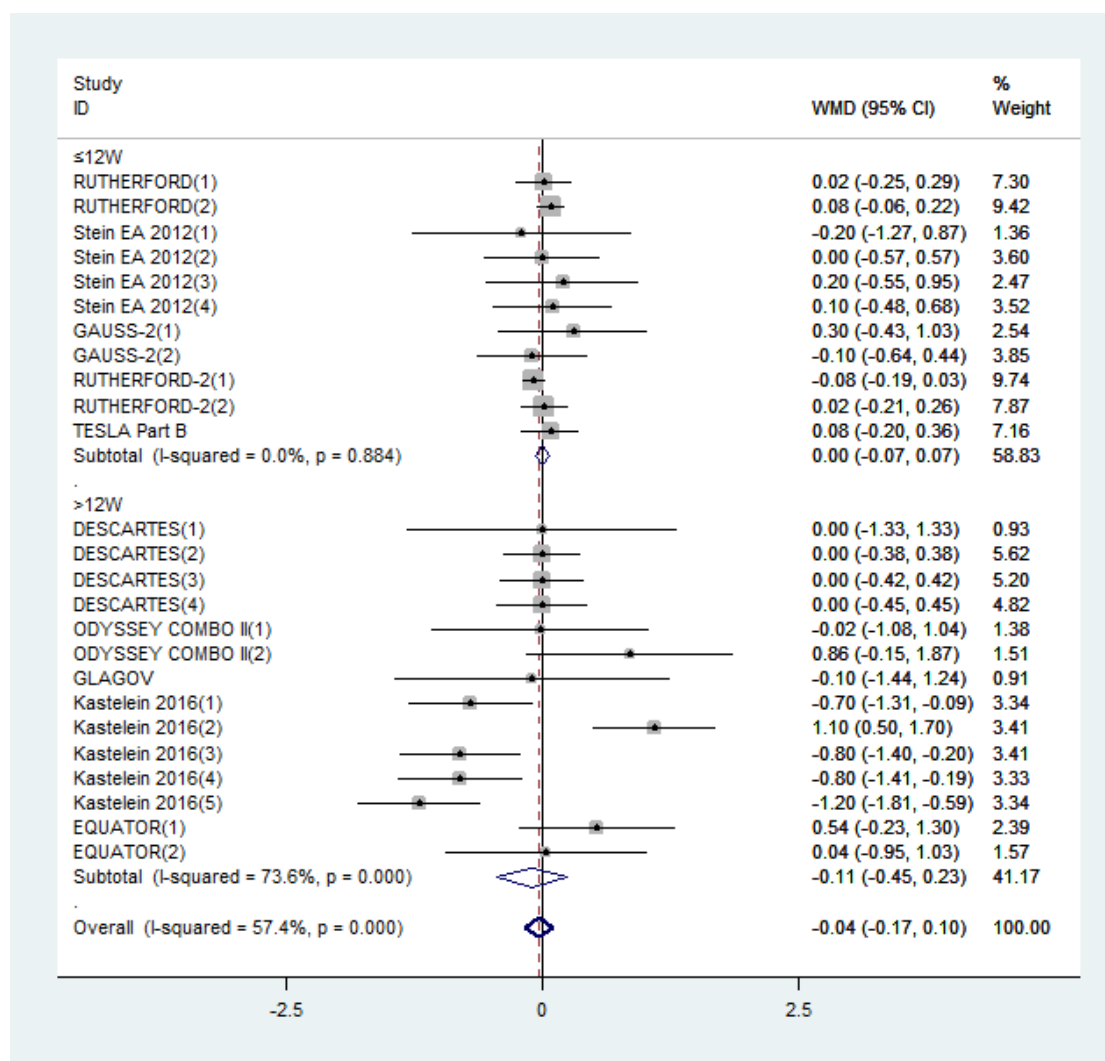

WMD=weighted mean difference, CI = confidence interval, hs-CRP=hypersensitive C-reactive protein

Supplementary Figure 4. Pooled analysis for hs-CRP stratified by participant characteristics

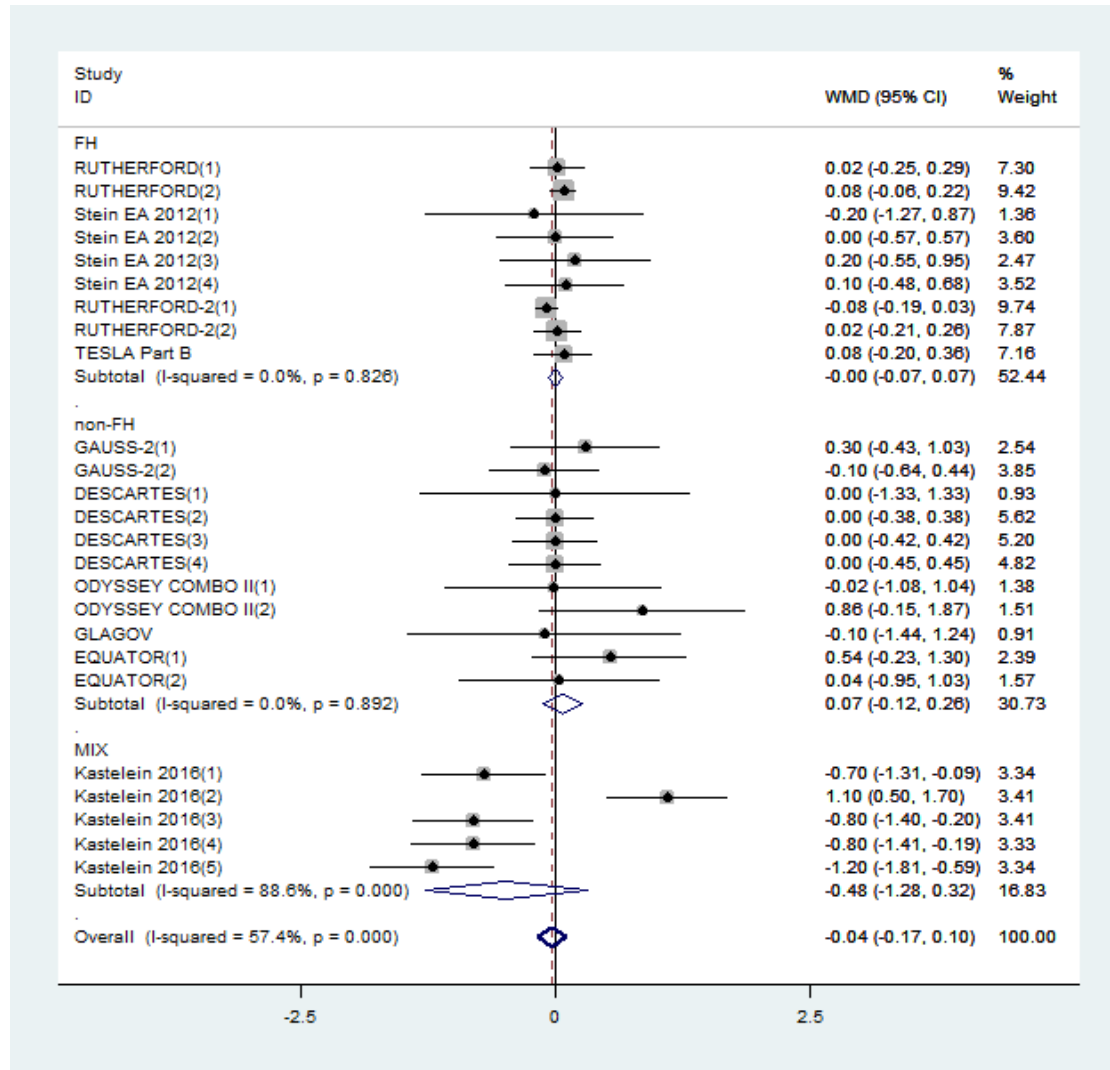

WMD= weighted mean difference, CI = confidence interval, hs-CRP=hypersensitive C-reactive protein, FH=familial hypercholesterolemia, non-FH= non-familial hypercholesterolemia

**Supplementary Figure 5.** Pooled analysis for hs-CRP stratified by of treatment methods.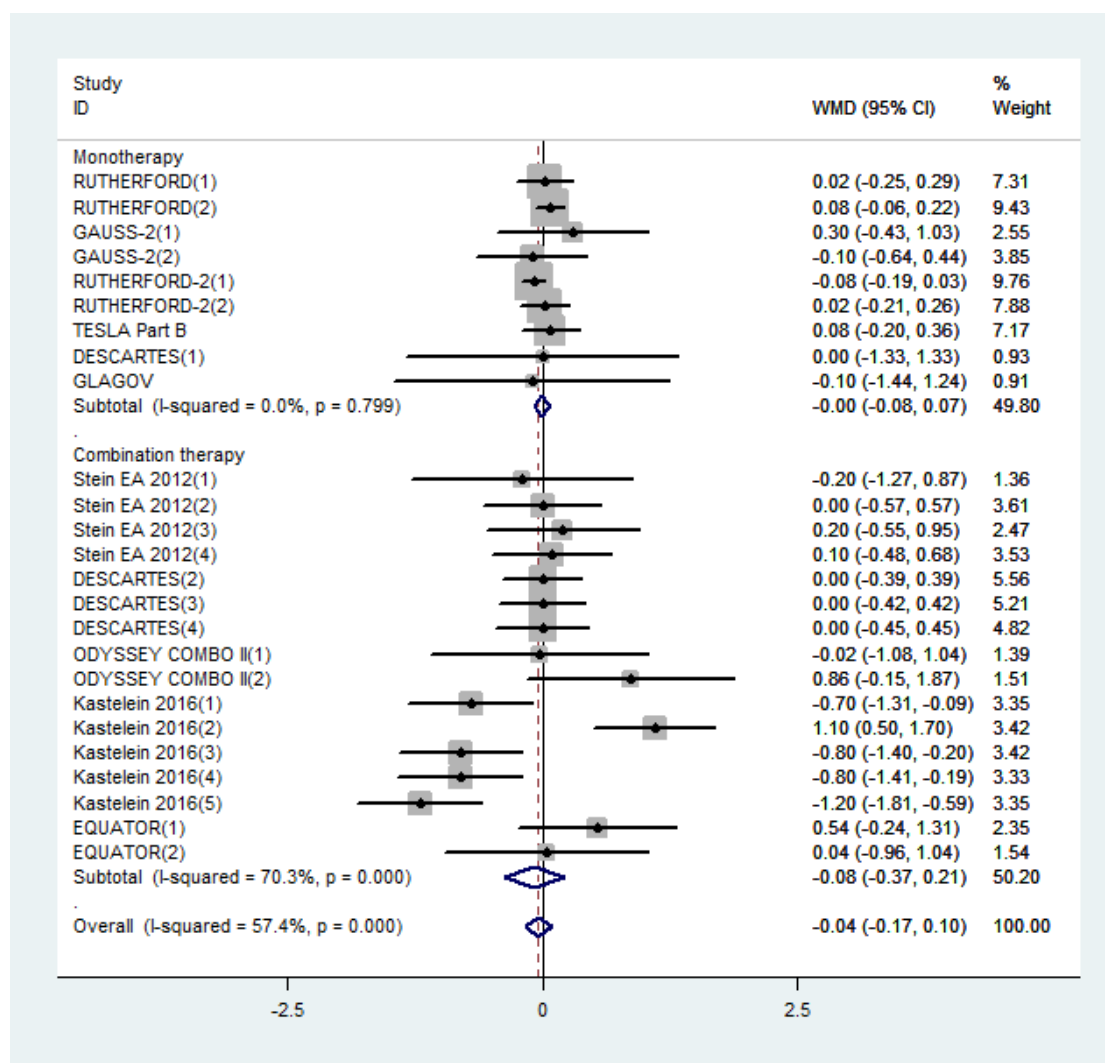

WMD=weighted mean difference, CI = confidence interval, hs-CRP=hypersensitive C-reactive protein

Supplementary Figure 6. Sensitivity analyses of hs-CRP.

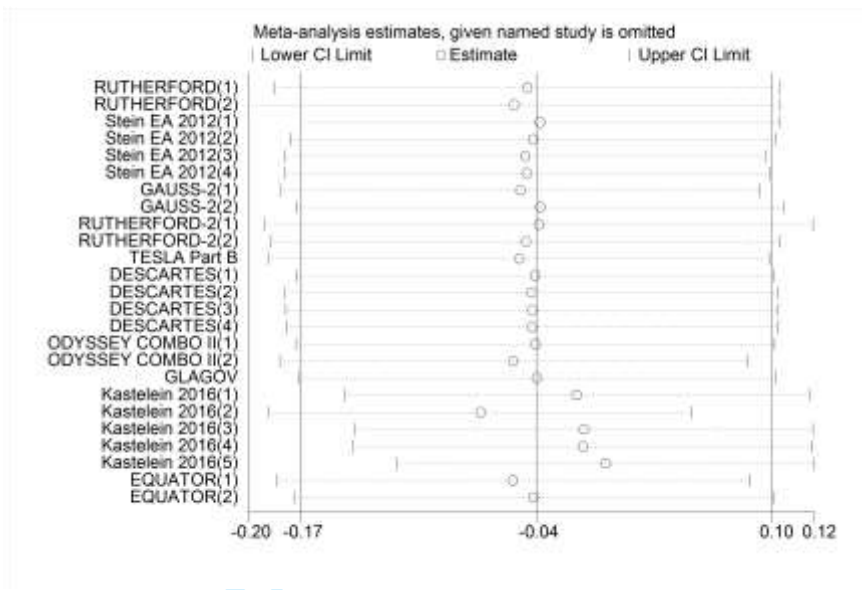

hs-CRP=hypersensitive C-reactive protein

Supplementary Figure 7. Funnel Plots of included studies

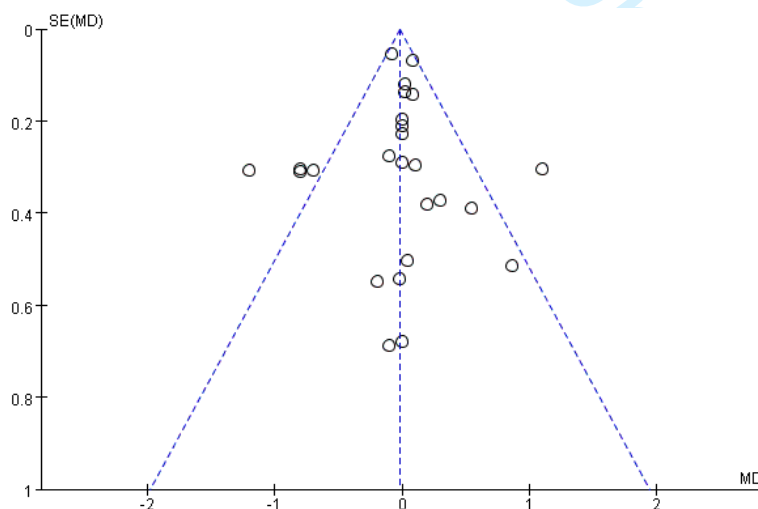

Supplementary Figure 8. Meta-regression of baseline age (A), sex (B) and percent change of LDL-C (C).

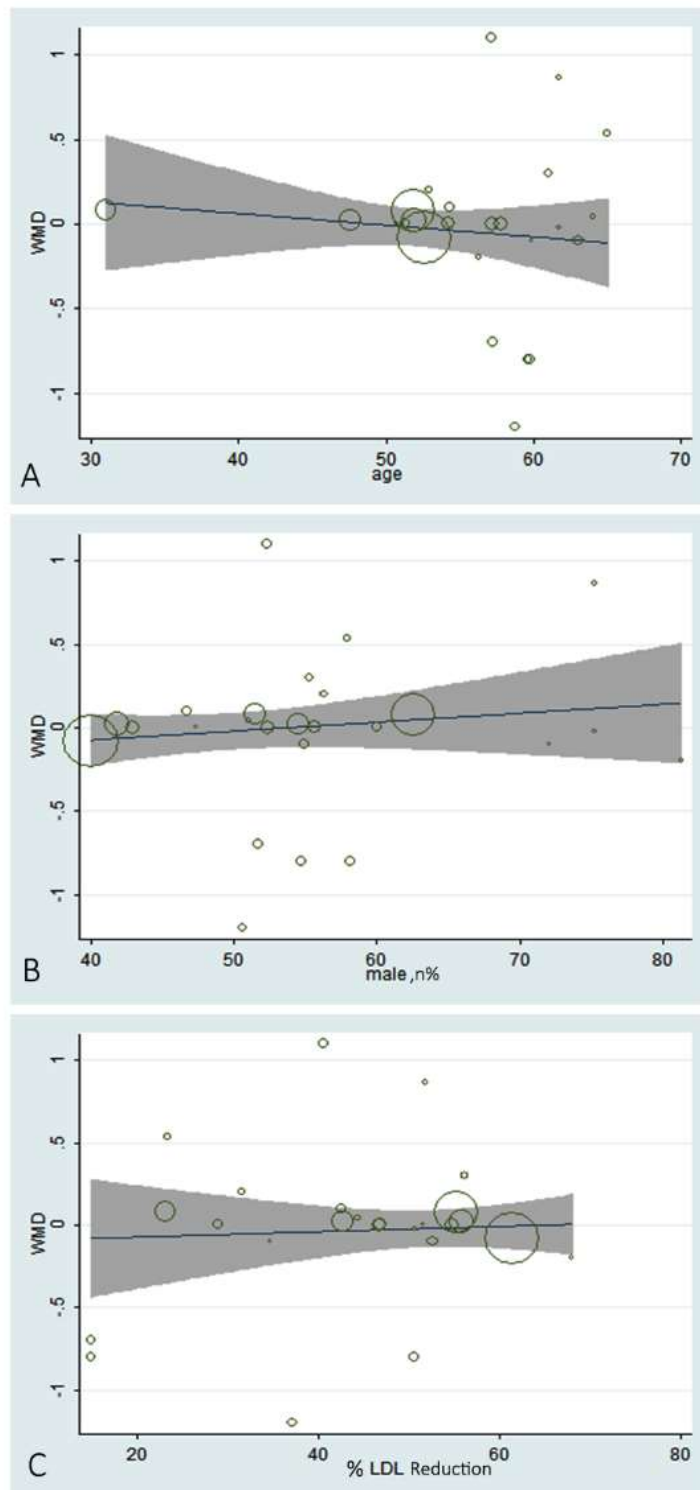

LDL-C=low density lipoprotein cholesterol

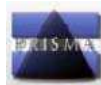

# PRISMA 2009 Checklist

| Section/topic                      | #  | Checklist item                                                                                                                                                                                                                                                                                              | Reported on page # |
|------------------------------------|----|-------------------------------------------------------------------------------------------------------------------------------------------------------------------------------------------------------------------------------------------------------------------------------------------------------------|--------------------|
| <b>TITLE</b>                       |    |                                                                                                                                                                                                                                                                                                             |                    |
| Title                              | 1  | Identify the report as a systematic review, meta-analysis, or both.                                                                                                                                                                                                                                         | 1                  |
| <b>ABSTRACT</b>                    |    |                                                                                                                                                                                                                                                                                                             |                    |
| Structured summary                 | 2  | Provide a structured summary including, as applicable: background; objectives; data sources; study eligibility criteria, participants, and interventions; study appraisal and synthesis methods; results; limitations; conclusions and implications of key findings; systematic review registration number. | 2                  |
| <b>INTRODUCTION</b>                |    |                                                                                                                                                                                                                                                                                                             |                    |
| Rationale                          | 3  | Describe the rationale for the review in the context of what is already known.                                                                                                                                                                                                                              | 4-5                |
| Objectives                         | 4  | Provide an explicit statement of questions being addressed with reference to participants, interventions, comparisons, outcomes, and study design (PICOS).                                                                                                                                                  | 5                  |
| <b>METHODS</b>                     |    |                                                                                                                                                                                                                                                                                                             |                    |
| Protocol and registration          | 5  | Indicate if a review protocol exists, if and where it can be accessed (e.g., Web address), and, if available, provide registration information including registration number.                                                                                                                               | 5-6                |
| Eligibility criteria               | 6  | Specify study characteristics (e.g., PICOS, length of follow-up) and report characteristics (e.g., years considered, language, publication status) used as criteria for eligibility, giving rationale.                                                                                                      | 6                  |
| Information sources                | 7  | Describe all information sources (e.g., databases with dates of coverage, contact with study authors to identify additional studies) in the search and date last searched.                                                                                                                                  | 6                  |
| Search                             | 8  | Present full electronic search strategy for at least one database, including any limits used, such that it could be repeated.                                                                                                                                                                               | 6                  |
| Study selection                    | 9  | State the process for selecting studies (i.e., screening, eligibility, included in systematic review, and, if applicable, included in the meta-analysis).                                                                                                                                                   | 6                  |
| Data collection process            | 10 | Describe method of data extraction from reports (e.g., piloted forms, independently, in duplicate) and any processes for obtaining and confirming data from investigators.                                                                                                                                  | 6-7                |
| Data items                         | 11 | List and define all variables for which data were sought (e.g., PICOS, funding sources) and any assumptions and simplifications made.                                                                                                                                                                       | 6                  |
| Risk of bias in individual studies | 12 | Describe methods used for assessing risk of bias of individual studies (including specification of whether this was done at the study or outcome level), and how this information is to be used in any data synthesis.                                                                                      | 6-7                |
| Summary measures                   | 13 | State the principal summary measures (e.g., risk ratio, difference in means).                                                                                                                                                                                                                               | 7-8                |
| Synthesis of results               | 14 | Describe the methods of handling data and combining results of studies, if done, including measures of consistency (e.g., $I^2$ ) for each meta-analysis.                                                                                                                                                   | 7-8                |

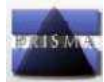

# PRISMA 2009 Checklist

Page 1 of 2

| Section/topic                 | #  | Checklist item                                                                                                                                                                                           | Reported on page # |
|-------------------------------|----|----------------------------------------------------------------------------------------------------------------------------------------------------------------------------------------------------------|--------------------|
| Risk of bias across studies   | 15 | Specify any assessment of risk of bias that may affect the cumulative evidence (e.g., publication bias, selective reporting within studies).                                                             | 7-8                |
| Additional analyses           | 16 | Describe methods of additional analyses (e.g., sensitivity or subgroup analyses, meta-regression), if done, indicating which were pre-specified.                                                         | 7-8                |
| <b>RESULTS</b>                |    |                                                                                                                                                                                                          |                    |
| Study selection               | 17 | Give numbers of studies screened, assessed for eligibility, and included in the review, with reasons for exclusions at each stage, ideally with a flow diagram.                                          | 8-9                |
| Study characteristics         | 18 | For each study, present characteristics for which data were extracted (e.g., study size, PICOS, follow-up period) and provide the citations.                                                             | 8-9                |
| Risk of bias within studies   | 19 | Present data on risk of bias of each study and, if available, any outcome level assessment (see item 12).                                                                                                | 9                  |
| Results of individual studies | 20 | For all outcomes considered (benefits or harms), present, for each study: (a) simple summary data for each intervention group (b) effect estimates and confidence intervals, ideally with a forest plot. | 9-10,22            |
| Synthesis of results          | 21 | Present results of each meta-analysis done, including confidence intervals and measures of consistency.                                                                                                  | 10                 |
| Risk of bias across studies   | 22 | Present results of any assessment of risk of bias across studies (see Item 15).                                                                                                                          | 10-11              |
| Additional analysis           | 23 | Give results of additional analyses, if done (e.g., sensitivity or subgroup analyses, meta-regression [see Item 16]).                                                                                    | 10                 |
| <b>DISCUSSION</b>             |    |                                                                                                                                                                                                          |                    |
| Summary of evidence           | 24 | Summarize the main findings including the strength of evidence for each main outcome; consider their relevance to key groups (e.g., healthcare providers, users, and policy makers).                     | 10                 |
| Limitations                   | 25 | Discuss limitations at study and outcome level (e.g., risk of bias), and at review-level (e.g., incomplete retrieval of identified research, reporting bias).                                            | 14                 |
| Conclusions                   | 26 | Provide a general interpretation of the results in the context of other evidence, and implications for future research.                                                                                  | 14                 |
| <b>FUNDING</b>                |    |                                                                                                                                                                                                          |                    |
| Funding                       | 27 | Describe sources of funding for the systematic review and other support (e.g., supply of data); role of funders for the systematic review.                                                               | 15                 |

From: Moher D, Liberati A, Tetzlaff J, Altman DG, The PRISMA Group (2009). Preferred Reporting Items for Systematic Reviews and Meta-Analyses: The PRISMA Statement. PLoS Med 6(7): e1000097. doi:10.1371/journal.pmed1000097

For more information, visit: [www.prisma-statement.org](http://www.prisma-statement.org).

Page 2 of 2

For peer review only - <http://bmjopen.bmj.com/site/about/guidelines.xhtml>

# BMJ Open

## Impact of PCSK9-monoclonal antibodies on circulating hs-CRP levels: a systematic review and meta-analysis of randomized controlled trials

|                                 |                                                                                                                                                                                                                                                                                                                                                                                                                                                                                                                                                                                                                                                                                                                                                                                                                                                                          |
|---------------------------------|--------------------------------------------------------------------------------------------------------------------------------------------------------------------------------------------------------------------------------------------------------------------------------------------------------------------------------------------------------------------------------------------------------------------------------------------------------------------------------------------------------------------------------------------------------------------------------------------------------------------------------------------------------------------------------------------------------------------------------------------------------------------------------------------------------------------------------------------------------------------------|
| Journal:                        | <i>BMJ Open</i>                                                                                                                                                                                                                                                                                                                                                                                                                                                                                                                                                                                                                                                                                                                                                                                                                                                          |
| Manuscript ID                   | bmjopen-2018-022348.R1                                                                                                                                                                                                                                                                                                                                                                                                                                                                                                                                                                                                                                                                                                                                                                                                                                                   |
| Article Type:                   | Research                                                                                                                                                                                                                                                                                                                                                                                                                                                                                                                                                                                                                                                                                                                                                                                                                                                                 |
| Date Submitted by the Author:   | 22-May-2018                                                                                                                                                                                                                                                                                                                                                                                                                                                                                                                                                                                                                                                                                                                                                                                                                                                              |
| Complete List of Authors:       | Cao, Ye-Xuan; State Key Laboratory of Cardiovascular Disease, Fu Wai Hospital, National Center for Cardiovascular Diseases, Chinese Academy of Medical Sciences, Peking Union Medical College<br>Li, Sha; State Key Laboratory of Cardiovascular Disease, Fu Wai Hospital, National Center for Cardiovascular Diseases, Chinese Academy of Medical Sciences, Peking Union Medical College, Division of Dyslipidemia<br>Liu, Hui-Hui; State Key Laboratory of Cardiovascular Disease, Fu Wai Hospital, National Center for Cardiovascular Diseases, Chinese Academy of Medical Sciences, Peking Union Medical College, Division of Dyslipidemia<br>Li, Jian-Jun; Division of Dyslipidemia, State Key Laboratory of Cardiovascular Disease, Fuwai Hospital, National Center for Cardiovascular Diseases, Chinese Academy of Medical Sciences, Peking Union Medical College |
| <b>Primary Subject Heading</b>: | Cardiovascular medicine                                                                                                                                                                                                                                                                                                                                                                                                                                                                                                                                                                                                                                                                                                                                                                                                                                                  |
| Secondary Subject Heading:      | Pharmacology and therapeutics                                                                                                                                                                                                                                                                                                                                                                                                                                                                                                                                                                                                                                                                                                                                                                                                                                            |
| Keywords:                       | PCSK9, monoclonal antibody, hs-CRP, meta-analysis                                                                                                                                                                                                                                                                                                                                                                                                                                                                                                                                                                                                                                                                                                                                                                                                                        |
|                                 |                                                                                                                                                                                                                                                                                                                                                                                                                                                                                                                                                                                                                                                                                                                                                                                                                                                                          |

SCHOLARONE™  
Manuscripts



1  
2  
3 **Revised bmjopen-2018-022348**

2018-05-22

4  
5  
6  
7 **Title:** Impact of PCSK9-monoclonal antibodies on circulating hs-CRP levels: a systematic  
8 review and meta-analysis of randomized controlled trials  
9

10  
11  
12  
13  
14  
15 **Running Title:** PCSK9-mAb and hs-CRP

16  
17  
18  
19  
20 **Authors:** Ye-Xuan Cao, MD\*, Sha Li, MD, PhD\*, Hui-Hui Liu, MD\*, Jian-Jun Li, MD, PhD\*  
21

22  
23  
24  
25  
26 **Affiliations:** \*Division of Dyslipidemia, State Key Laboratory of Cardiovascular Disease, Fu  
27 Wai Hospital, National Center for Cardiovascular Diseases, Chinese Academy of Medical  
28 Sciences, Peking Union Medical College, BeiLiShi Road 167, Beijing 100037, China.  
29

30  
31  
32  
33  
34  
35  
36 **Correspondence:** Professor Jian-Jun Li, MD, PhD, FESC, FACC. Division of Dyslipidemia,  
37 State Key Laboratory of Cardiovascular Disease, Fu Wai Hospital, National Center for  
38 Cardiovascular Diseases, Chinese Academy of Medical Sciences, Peking Union Medical  
39 College, BeiLiShi Road 167, Beijing 100037, China. Tel: 86+10+88396077; Fax:  
40 86+10+88396584. E-mail: [lijianjun938@126.com](mailto:lijianjun938@126.com).  
41  
42  
43  
44  
45

46  
47  
48  
49  
50 **Total word count:** 2633

51  
52  
53 **Number of tables/figures:** tables 1; figures 3  
54  
55  
56

## ABSTRACT

**Objective** To evaluate the potential effect of proprotein convertase subtilisin/kexin type 9 monoclonal antibody (PCSK9-mAb) on high-sensitivity C-reactive (hs-CRP) concentrations.

**Design** A systematic review and meta-analysis of randomized controlled trials.

**Data sources** PubMed, MEDLINE, The Cochrane Library databases, ClinicalTrials.gov and recent conferences were searched from inception to May 2018.

**Eligibility criteria for selecting studies** All randomized controlled trials that reported changes of hs-CRP were included.

**Results** Ten studies involving 4198 participants were identified. PCSK9-mAbs showed a slight efficacy in reducing hs-CRP (-0.04mg/L, 95%CI:-0.17 to 0.01) but no statistically different. The results did not altered when subgroup analyses were performed including PCSK9-mAb types (Alirocumab:0.12mg/L, 95% CI:-0.18 to 0.43; Evolocumab:0.00 mg/L, 95% CI:-0.07 to 0.07; LY3015014:-0.48mg/L, 95% CI:-1.28 to 0.32; RG7652:0.35mg/L, 95% CI:-0.26 to 0.96), treatment duration ( $\leq 12w$ :0.00mg/L, 95% CI:-0.07 to 0.07;  $>12w$ : -0.11mg/L, 95% CI:-0.45 to -0.23), participant characteristics (familial hypercholesterolemia: 0.00mg/L, 95% CI:-0.07 to 0.07; non-familial hypercholesterolemia:0.07mg/L, 95% CI:-0.12 to 0.26; mix:-0.48mg/L, 95%CI:-1.28 to 0.32) and treatment methods (monotherapy: 0.00mg/L, -0.08 to 0.07; combination-therapy: -0.08mg/L, -0.37 to 0.21). Meta-regression analyses suggested no significant linear correlation between baseline age ( $p=0.673$ ), sex ( $p=0.645$ ), and low-density lipoprotein cholesterol reduction ( $p=0.339$ ).

**Conclusions** Our updated meta-analysis suggested that PCSK9-mAbs had no significant impact on circulating hs-CRP levels irrespective of PCSK9-mAb types, participant characteristics, and treatment duration or methods.

**Keywords:** PCSK9; monoclonal antibody; hs-CRP; meta-analysis

### Strengths and limitations of this study

- This is a comprehensive systematic review and meta-analysis of randomized controlled trials, which is conducted following the Preferred Reporting Items for Systematic Reviews and Meta-Analyses statement.
- We used a broad search strategy and identified 10 studies that reported the changes of high-sensitivity C-reactive protein when proprotein convertase subtilisin/kexin type 9 monoclonal antibody was applied.
- Studies with moderate heterogeneity and lack of individual level data.

## Introduction

Cardiovascular disease is the greatest burden of global health, which is mainly characterized by atherosclerosis<sup>1</sup>. Atherosclerosis is a chronic and progressive inflammatory disease, including endothelial dysfunction, lipid accumulation in the arterial wall and leukocyte infiltration, which leads to luminal stenosis, plaque rupture and acute coronary syndrome (ACS)<sup>2</sup>. Apart from well-established lipid theory, inflammation also plays an important role in the initiation and progression of atherosclerosis<sup>3</sup>. Recently, the Canakinumab Antiinflammatory Thrombosis Outcome Study (CANTOS) reported that anti-inflammatory therapy by canakinumab, a therapeutic monoclonal antibody targeting interleukin-1 $\beta$ , significantly reduced the primary cardiovascular end points<sup>4</sup>. This study attracted attention to the inflammation intervention in cardiovascular medicine again.

C-reactive protein (CRP), especially high-sensitivity CRP (hs-CRP), is the most intensively investigated inflammatory biomarker in cardiovascular field<sup>5</sup>. Increasing studies have confirmed that hs-CRP is a predictor for the progression of atherosclerotic disease and future major adverse cardiovascular events (MACE)<sup>6,7</sup>. Moreover, previous studies also indicated that hs-CRP played a direct role in the development of atherosclerosis<sup>8,9</sup>. Therefore, reduction of inflammatory markers such as hs-CRP may be a strategy for decreasing MACE<sup>10,11</sup>.

Proprotein convertase subtilisin/kexin type 9 (PCSK9) is known to target low-density lipoprotein receptor (LDLR) for degradation resulting in elevated plasma low-density lipoprotein cholesterol (LDL-C) levels<sup>12-14</sup>. Recently, it has been reported that PCSK9 monoclonal antibody (PCSK9-mAb), as a novel lipid-lowering drug, can reduce LDL-C by a mean of 70% accompanied with reduction of MACE<sup>15</sup>. Although the relation of PCSK9 to LDL-C has been established, its role in inflammation has not been fully understood. Several experimental studies found that PCSK9 could promote the progression of atherosclerosis by

1  
2  
3 enhancing inflammatory reaction<sup>16</sup>. On the other hand, PCSK9 deficiency could alleviate the  
4 inflammation reaction<sup>17</sup>. Hence, whether PCSK9-mAb can reduce inflammatory marker is  
5 clinically of great interest since it was used to treat cardiovascular diseases. A meta-analysis  
6 covering 7 randomized controlled trials (RCTs) studies published two years ago suggested  
7 that PCSK9-mAbs had no effect on serum hs-CRP<sup>18</sup>. However, this meta-analysis may be  
8 limited by insufficient subgroup analyses, sample size, and lack of newly published data<sup>19,20</sup>.  
9 Hence, we performed this meta-analysis including all RCTs published till May 2018 to  
10 further explore the efficacy of PCSK9-mAbs on circulating hs-CRP levels.  
11  
12  
13  
14  
15  
16  
17  
18  
19  
20  
21

## 22 **Methods**

### 23 *Patient and public involvement statement*

24 Patients and the public were not involved.  
25  
26  
27  
28  
29  
30

### 31 *Literature search*

32 The present study was designed according to the guidelines of the 2009 Preferred Reporting  
33 Items for Systematic Reviews and Meta Analyses (PRISMA) statement<sup>21</sup>. To identify all  
34 RCTs assessing the effect of PCSK9-mAbs on circulating hs-CRP levels, we  
35 comprehensively searched PubMed, MEDLINE, and the Cochrane Library database and  
36 ClinicalTrials.gov up until May 2018. The search terms we used included the followings:  
37 (AMG145 or Evolocumab or REGN727 or SAR236553 or Alirocumab or RN316 or  
38 bococizumab or RG7652 or LY3015014 or PCSK9 antibody or anti-PCSK9) AND  
39 (randomized controlled trial OR randomized OR randomly). Meanwhile, manual search was  
40 performed for relevant studies including references lists, relevant review articles and  
41 commentaries. No language restriction was used.  
42  
43  
44  
45  
46  
47  
48  
49  
50  
51  
52  
53  
54  
55  
56  
57  
58  
59  
60

### ***Study selection***

Original studies met the following criteria would be included: the design was phase 2 or phase 3 double-blind RCTs with longer than 8 weeks treatment duration; human participants were randomly assigned to PCSK9-mAbs group versus control group with or without other lipid-lowering therapy; outcomes included percentage changes of hs-CRP from baseline. Studies were excluded if they were duplicate publications, review articles, non-human studies, observational studies, and lack of adequate information on outcomes or lacking control group. Two investigators (YC and SL) independently screened and selected the eligible studies. Disagreements were resolved by discussion with a third investigator.

### ***Data Extraction***

A standardized extraction form was used to extract the following items by two investigators (YC and HL) independently: trial name/first author, year of publication, type of intervention, follow-up period, treatment duration, number of patients, participant characteristics, background lipid-lowering therapy, types and doses of PCSK9-mAbs, LDL and hs-CRP levels at baseline and changes. We included the final reported follow-up point if a trial contains several time points. If necessary, further information was required from correspondence author.

### ***Quality Assessment***

We used Cochrane Collaboration's tool and Jadad score to assess the data and the methodological quality of included RCTs. For Cochrane Collaboration's tool, the following items were performed: random sequence generation (selection bias), allocation concealment (selection bias), blinding of participants and personnel (performance bias), blinding of outcome assessment (detection bias), incomplete outcome data (attrition bias), selective

1  
2  
3 reporting (reporting bias), and other sources of bias. The judgments were classified as ‘low  
4 risk’, ‘high risk’, and ‘unclear risk’ of bias. The 5-point Jadad score included the following  
5 items: basis of randomization (0 to 2 points), double blinding (0 to 2 points), and withdrawals  
6 /dropouts (0 to 1 points). Studies with a score  $\geq 3$  points are considered to be high quality.  
7 Two investigators (YC and HL) independently assessed the quality of each study.  
8 Disagreements were resolved by discussion with a third investigator.  
9  
10  
11  
12  
13  
14  
15  
16  
17

### 18 ***Data Synthesis and Statistical Analysis***

19  
20 All analyses were conducted according to the intention-to-treat principles. For all efficacy  
21 outcomes, changes in hs-CRP concentrations were expressed as weighted mean difference  
22 (WMD) and 95% confidence interval (CI). All the data were standardized and expressed by  
23 mg/mL. Standard deviation could be calculated from CI, interquartile range or standard error  
24 according to formulas in the Cochrane Handbook for Systematic Reviews of Interventions if  
25 not reported.  
26  
27  
28  
29  
30  
31  
32

33 Heterogeneity was assessed by the Cochran Q test and the  $I^2$  statistic. We considered  
34  $I^2 < 25\%$  as representing low heterogeneity and  $I^2 > 75\%$  as representing at high heterogeneity.  
35 Outcomes were calculated by fixed-effects models under no or low to moderate inconsistency  
36 ( $I^2 < 50\%$ ); otherwise, the data was pooled based on random-effects models. Subgroups were  
37 applied to reduce the heterogeneity if  $I^2 \geq 50\%$ , such as PCSK9-mAb types, treatment  
38 duration, and participant characteristics. In order to explore the resource of heterogeneity,  
39 sensitivity analysis was conducted by omitting studies in turn to evaluate the consistency of  
40 the results. Meta-regression analyses were performed to evaluate the contribution of  
41 participant characteristics and reductions in LDL-C concentrations. Publication bias was  
42 assessed with a funnel plot and Egger’s test.  
43  
44  
45  
46  
47  
48  
49  
50  
51  
52  
53

54 All analyses were conducted with Review Manager Version 5.3 (Copenhagen: The  
55  
56  
57  
58  
59  
60

1  
2  
3 Nordic Cochrane Centre, The Cochrane Collaboration, Denmark) and Stata 14.0 (Stata  
4 Statistical Software: College Station, TX: Stata Corp LP). P value <0.05 was considered to be  
5 statistically significant.  
6  
7  
8  
9

## 10 11 **Results**

### 12 *Study selection and Characteristics*

13  
14  
15 The initial search identified 575 articles. After excluding duplicate publications and screening  
16 the titles and abstracts, 430 were excluded and 145 studies were retrieved for full-text  
17 identification. We further excluded 135 studies, of which 58 were pooled or meta-analysis, 2  
18 studies were not RCTs and 13 was phase 1 trials, 16 were open label trails and 42 without  
19 adequate information. Finally, ten studies were included in this meta-analysis<sup>20,22-30</sup>. Figure 1  
20 shows flow diagram of selection process.  
21  
22  
23  
24  
25  
26  
27

28  
29 These ten studies were published between 2012 and 2017 from different countries with  
30 low risk of bias, of which 5 were phase 2 studies and 5 were phase 3 studies (Table 1). A total  
31 of 4198 participants were included, comprising 2728 individuals in the PCSK9-mAb group  
32 and 1470 in the control group. Alirocumab (SAR236553/REGN727) was used in 4 arms and  
33 11 arms applied Evolocumab (AMG 145). Five arms managed LY3015014 and 2 arms used  
34 RG7652. Four trials included patients with familial hypercholesterolemia (FH), of which 3  
35 were heterozygous FH (HeFH) and 1 was homozygous FH (HoFH). Most of the treatment  
36 duration ranged from 12 to 24 weeks and the longest treatment duration was 78 weeks. Apart  
37 from DESCARTES trial which co-administered with atorvastatin, another 9 studies used  
38 PCSK9-mAb as monotherapy. Baseline characteristics including circulating hs-CRP levels  
39 were similar between PCSK9-mAbs and control groups within each study. The characteristics  
40 of these trials and participants are summarized in Table 1. All these studies had a relatively  
41 high quality evaluated by the Jadad score and low risk of bias (online supplementary Table 1  
42  
43  
44  
45  
46  
47  
48  
49  
50  
51  
52  
53  
54  
55  
56  
57  
58  
59  
60



and online supplementary Figure 1, 3 scores=5, 6 scores=4).

### ***Efficacy outcomes of PCSK9-mAbs on hs-CRP***

A total of 4198 participants were included in the analysis of efficacy of PCSK9-mAbs on plasma hs-CRP concentrations before and after treatment. When data were pooled, PCSK9-mAbs showed a slight efficacy in reducing hs-CRP (WMD: -0.04mg/L, 95%CI: -0.17 to 0.01), while no statistical difference was found compared with control treatment (Figure 2). There was a moderate heterogeneity between each study ( $I^2=57.4%$ ,  $P=0.0001$ ), so the random-effect model was selected.

To assess the potential discrepancy, we applied the subgroup analyses based on the characteristics of trials and participants (Figure 3 and online supplementary Figures 2-5). Although the efficacy of LY3015014 was a mild higher (-0.48 mg/L, 95% CI:-1.28 to 0.32), there was no difference between these four antibodies (Alirocumab: 0.12 mg/L, 95% CI: -0.18 to 0.43; Evolocumab: 0.00 mg/L, 95% CI: -0.07 to 0.07; RG7652: 0.35 mg/L, 95% CI: -0.26 to 0.96). When studies were classified by treatment duration, the hs-CRP reduction showed no difference in less than 12-week duration group (0.00 mg/L, 95% CI: -0.07 to 0.07) and above 12-week duration group (-0.11mg/L, 95% CI: -0.45 to -0.23). There was no significant reduction in circulating hs-CRP with use of PCSK9 antibodies compared with control treatment when categorized to participant characteristics (FH: 0.00 mg/L, 95% CI: -0.07 to 0.07; non-FH: 0.07 mg/L, 95% CI: -0.12 to 0.26; mix: -0.48 mg/L, 95%CI: -1.28 to 0.32). The analysis stratified by treatment method also supported the results that no differential effect of PCSK9-mAb therapy on plasma hs-CRP concentrations was observed (monotherapy: 0.00 mg/L, 95%CI: -0.08 to 0.07 vs combination-therapy: -0.08 mg/L, 95%CI: -0.37 to 0.21).

### ***Sensitivity analysis and publication bias***

The sensitivity analysis for all outcomes was conducted by gradually removing each study. However, the results did not change meaningfully (online supplementary Figure 6). Neither funnel plots (online supplementary Figure 7) nor Egger's regression test ( $p=0.913$ ) showed publication bias.

### ***Meta-regression analyses***

We used meta-regression analyses to assess the relationship between changes in hs-CRP and baseline age, sex, and average LDL changes (online supplementary Figure 8). No statistically significant relationship between baseline age ( $p=0.673$ ), male sex ( $p=0.645$ ), and hs-CRP changes were observed. Likewise, LDL-C lowering effects by PCSK9-mAb therapy had no impact on hs-CRP lowering ( $p=0.339$ , online supplementary Figure 8).

### **Discussion**

The results of this updated, comprehensive meta-analysis, based on 10 RCTs encompassing 4198 participants, suggested that short-term PCSK9-mAb therapy had no impact on circulating hs-CRP concentrations. In the subgroup analyses, no difference was found between PCSK9-mAb types, participant characteristics, and treatment duration or methods.

Atherosclerosis, a chronic progressive disorder, is characterized by lipid accumulation and chronic inflammation in the arterial wall<sup>2</sup>. Although previous data indicated a positive effects of anti-inflammatory drugs on atherosclerosis in animal studies but no positive data was available in human studies<sup>31</sup>. Fortunately, recent evidence from CANTOS found that canakinumab significantly reduced hs-CRP levels and MACE after follow-up of 3.7 years which may support the inflammatory hypothesis of atherosclerosis<sup>4</sup>. Moreover, ongoing Cardiovascular Inflammation Reduction Trial (CIRT) was also designed to directly test the

1  
2  
3 inflammatory hypothesis of atherosclerosis by evaluating the effect of methotrexate on  
4 adverse cardiovascular outcomes without substantive impact on lipids<sup>32</sup>. Hence, focusing on  
5 inflammation in the development of atherosclerosis may be an unsolved issue and great of  
6 interest clinically.  
7  
8  
9

10  
11 In fact, increasing studies indicated that hs-CRP could independently predict MACE<sup>6</sup>.  
12 Framingham study found that men and women in the highest quartile of CRP respectively  
13 had twice and three-times the risk of stroke compared with those in the lowest ones after  
14 more than 10-years follow-up<sup>33</sup>. The Northern Manhattan Study reported that >3 mg/L CRP  
15 was associated with a 1.7-fold increase in cardiovascular outcomes and a 1.55-fold increase  
16 in mortality<sup>34</sup>. Furthermore, it has been demonstrated that hs-CRP also plays a direct and vital  
17 role in the development of atherosclerosis. Zwaka et al<sup>8</sup> found that CRP enhanced the  
18 transformation from macrophages to foam cells by increasing the uptake of LDL. CRP was  
19 also reported to impair vasodilatation, inhibit the synthesis of nitric oxide synthase, and  
20 facilitate the adhesion of monocyte<sup>35,36</sup>. Based on these evidence, reduction of hs-CRP may  
21 be associated with a decrease in MACE. Interestingly, the JUPITER study applied  
22 rosuvastatin on individuals with LDL-C levels below 130 mg/dL and hs-CRP levels  $\geq 2$  mg/L,  
23 and suggested a significant reduction in all vascular events<sup>37</sup>. Although a fact that statins  
24 lower LDL-C and proportionately reduce MACE is widely accepted, the hs-CRP reduction by  
25 statin administration is also an attractive phenomenon, called as pleiotropic effect of statin.  
26 That is the reason why we chose hs-CRP as an inflammatory biomarker to identify whether  
27 PCSK9-mAb has an effect on inflammatory status.  
28  
29  
30  
31  
32  
33  
34  
35  
36  
37  
38  
39  
40  
41  
42  
43  
44  
45  
46

47  
48 Although the relationship between PCSK9 and LDL-C was well-established, more and  
49 more evidence demonstrated its function beyond lipids. In 2010, microarray gene expression  
50 analysis suggested that PCSK9 affected not only cholesterol metabolism, but also  
51 inflammation<sup>38</sup>. Experimental studies indicated that PCSK9 could participate in vascular and  
52  
53  
54  
55  
56

1  
2  
3 systemic inflammation<sup>16</sup>. In transgenic mice expressing human PCSK9 gene, Tavori et al<sup>39</sup>  
4 observed that atherosclerosis lesion size and local Ly6C<sup>hi</sup> monocytes, the precursors of  
5 pro-inflammatory M1 macrophages, significantly increased. Clinical studies further  
6 supported this hypothesis. Our previous study found that serum PCSK9 concentrations were  
7 independently associated with white blood cell count in patients with stable coronary artery  
8 disease, indicating PCSK9 might be involved in the inflammation process<sup>40</sup>.  
9  
10  
11  
12  
13  
14  
15  
16  
17  
18  
19  
20  
21  
22  
23  
24  
25  
26  
27  
28  
29  
30  
31  
32  
33  
34  
35  
36  
37  
38  
39  
40  
41  
42  
43  
44  
45  
46  
47  
48  
49  
50  
51  
52  
53  
54  
55  
56  
57  
58  
59  
60

ATHEROREMO-IVUS study reported a positive linearly association between PCSK9 levels and coronary plaque inflammation including amount of necrotic core tissue and plaque volume<sup>41</sup>. On the other hand, data also showed that PCSK9 inhibition could exert an anti-inflammatory effect. Tang et al<sup>42</sup> reported that PCSK9 small interfering RNA reduced the expression of pro-inflammatory genes through nuclear factor kappa B (NF-κB) pathway. In apoE<sup>-/-</sup> mice, PCSK9 silencing limited the development of atherosclerosis and decreased the number of macrophages via TLR4/NF-κB signaling pathway<sup>43</sup>. Besides, AT04A anti-PCSK9 vaccine also got the same results that anti-PCSK9 therapy could reduce vascular inflammation<sup>44</sup>. Recently, Bernelot et al<sup>45</sup> found that after 24 weeks of treatment with PCSK9-mAbs, the migratory capacity of monocytes and inflammatory responsiveness reduced significantly while anti-inflammatory cytokine levels increased in FH patients. Therefore, we hypothesized that PCSK9-mAbs treatment could reduce hs-CRP in randomized clinical studies. Unfortunately, in our meta-analysis the results showed that PCSK9-mAbs therapy had no effect on decreasing hs-CRP in both FH participants and non-FH individuals.

To explore the potential reasons why PCSK9-mAbs therapy was not benefit from inflammatory marker, named as the reduction of circulating hs-CRP levels, we further performed subgroup analyses. Firstly, we did not observe an impact of PCSK9-mAbs types on hs-CRP, which may exclude the influence of PCSK9-mAbs itself on the inflammatory marker in our meta-analysis. Besides, the same results were also observed in combination of

1  
2  
3 statins and PCSK9-mAbs group, suggesting that the effects of PCSK9-mAbs therapy on  
4  
5 hs-CRP is not linked with treatment methods. It is notable that the participants in JUPITER  
6  
7 trial had high levels of hs-CRP at baseline, while in PCSK9-mAb therapy, initial hs-CRP  
8  
9 levels were at normal range in recruited individuals. Finally, we did not find a positive effects  
10  
11 of PCSK9-mAbs therapeutic duration on hs-CRP in this updated analysis. Taken together, we  
12  
13 may conclude that although PCSK9-mAbs had a powerful ability in lowering LDL-C, they  
14  
15 had no impact on circulating hs-CRP concentration despite of PCSK9-mAb types, participant  
16  
17 characteristics, and treatment duration or methods.  
18  
19  
20  
21

### 22 **Limitations**

23  
24 There were several limitations in our meta-analysis. Firstly, our results were based on study  
25  
26 data but not individual data as in most meta-analyses. Secondly, although our meta-analysis is  
27  
28 an updated one, it is still limited by study numbers, sample size, and therapy duration.  
29  
30 Moreover, moderate degree of heterogeneity was observed in several comparisons. However,  
31  
32 there was no publication bias and the results were rather consistent among different  
33  
34 subgroups. Sensitivity analysis suggested that the pooled WMD were robust. Finally, some  
35  
36 studies included in this meta-analysis did not provide adequate information about blinding of  
37  
38 participants and personnel.  
39  
40  
41  
42  
43

### 44 **Conclusions**

45  
46 In conclusion, the current updated evidence suggested that PCSK9-mAb, a novel powerful  
47  
48 lipid-lowering drug, had no significant impact on circulating hs-CRP concentrations, whose  
49  
50 effect did not influenced by PCSK9-mAb types, participant characteristics, and treatment  
51  
52 duration or methods. Long-term observation may be needed.  
53  
54  
55  
56  
57  
58  
59  
60

## Acknowledgements

Not any.

## Contributors

JJL contributed to conception and design, acquisition, analysis, and interpretation, and critically revised the manuscript. YXC contributed to design, acquisition, analysis, and interpretation and drafted the manuscript. SL contributed to acquisition, analysis, and critically revised the manuscript. HHL contributed to analysis, interpretation and critically revised the manuscript. All the authors read and approved the final version of the manuscript.

## Funding

This work was partially supported by the Capital Health Development Fund (201614035) and CAMS Major Collaborative Innovation Project (2016-I2M-1-011) awarded to Dr. Jian-Jun Li, MD, PhD. The sponsors had no role in the decision to conduct the meta-analyses, data analysis, or reporting of the results.

**Competing interests:** None declared.

**Patient consent:** Not required.

**Ethics approval:** This research is exempt from ethical approval.

**Data sharing statement:** No additional data available.

**Reference**

1. Mathers CD, Loncar D. Projections of global mortality and burden of disease from 2002 to 2030. *PLoS Med.* 2006;3:e442.
2. Ross R. Atherosclerosis--an inflammatory disease. *N Engl J Med.* 1999;340:115-26.
3. Packard RR, Libby P. Inflammation in atherosclerosis: from vascular biology to biomarker discovery and risk prediction. *Clin Chem.* 2008;54:24-38.
4. Ridker PM, Everett BM, Thuren T, *et al.* Antiinflammatory Therapy with Canakinumab for Atherosclerotic Disease. *N Engl J Med.* 2017;377:1119-31.
5. Li JJ, Fang CH. C-reactive protein is not only an inflammatory marker but also a direct cause of cardiovascular diseases. *Med Hypotheses.* 2004;62:499-506.
6. Li JJ, Li S, Zhang Y, *et al.* Proprotein Convertase Subtilisin/Kexin type 9, C-Reactive Protein, Coronary Severity, and Outcomes in Patients With Stable Coronary Artery Disease: A Prospective Observational Cohort Study. *Medicine.* 2015;94:e2426.
7. Wang A, Liu J, Li C, *et al.* Cumulative Exposure to High-Sensitivity C-Reactive Protein Predicts the Risk of Cardiovascular Disease. *J Am Heart Assoc.* 2017; 6:e005610.
8. Zwaka TP, Hombach V, Torzewski J. C-reactive protein-mediated low density lipoprotein uptake by macrophages: implications for atherosclerosis. *Circulation.* 2001;103:1194-7.
9. Zhang YX, Cliff WJ, Schoefl GI, *et al.* Coronary C-reactive protein distribution: its relation to development of atherosclerosis. *Atherosclerosis.* 1999;145:375-9.
10. Li JJ, Fang CH. Effects of 4 weeks of atorvastatin administration on the antiinflammatory cytokine interleukin-10 in patients with unstable angina. *Clin Chem.* 2005;51:1735-8.
11. Li JJ, Li YS, Fang CH, *et al.* Effects of simvastatin within two weeks on

- 1  
2  
3 anti-inflammatory cytokine interleukin 10 in patients with unstable angina. *Heart*.  
4  
5 2006;92:529-30.  
6  
7 12. Cui CJ, Li S, Li JJ. PCSK9 and its modulation. *Clin Chim Acta*. 2015;440:79-86.  
8  
9 13. Li S, Li JJ. PCSK9: A key factor modulating atherosclerosis. *J Atheroscler Thromb*.  
10  
11 2015;22:221-30.  
12  
13 14. Li S, Zhang Y, Xu RX, *et al*. Proprotein convertase subtilisin-kexin type 9 as a  
14  
15 biomarker for the severity of coronary artery disease. *Ann Med*. 2015;47:386-93.  
16  
17 15. Roth EM, McKenney JM, Hanotin C, *et al*. Atorvastatin with or without an antibody  
18  
19 to PCSK9 in primary hypercholesterolemia. *N Engl J Med*. 2012;367:1891-900.  
20  
21 16. Giunzioni I, Tavori H, Covarrubias R, *et al*. Local effects of human PCSK9 on the  
22  
23 atherosclerotic lesion. *J Pathol*. 2016;238:52-62.  
24  
25 17. Kuhnast S, van der Hoorn JW, Pieterman EJ, *et al*. Alirocumab inhibits  
26  
27 atherosclerosis, improves the plaque morphology, and enhances the effects of a statin.  
28  
29 *J Lipid Res*. 2014;55:2103-12.  
30  
31 18. Sahebkar A, Di Giosia P, Stamerra CA, *et al*. Effect of monoclonal antibodies to  
32  
33 PCSK9 on high-sensitivity C-reactive protein levels: a meta-analysis of 16  
34  
35 randomized controlled treatment arms. *Br J Clin Pharmacol*. 2016;81:1175-90.  
36  
37 19. Gencer B, Montecucco F, Nanchen D, *et al*. Prognostic value of PCSK9 levels in  
38  
39 patients with acute coronary syndromes. *Eur Heart J*. 2016;37:546-53.  
40  
41 20. Kastelein JJ, Nissen SE, Rader DJ, *et al*. Safety and efficacy of LY3015014, a  
42  
43 monoclonal antibody to proprotein convertase subtilisin/kexin type 9 (PCSK9): a  
44  
45 randomized, placebo-controlled Phase 2 study. *Eur Heart J*. 2016;37:1360-9.  
46  
47 21. Moher D, Shamseer L, Clarke M, *et al*. Preferred reporting items for systematic  
48  
49 review and meta-analysis protocols (PRISMA-P) 2015 statement. *Syst Rev*. 2015;4:1.  
50  
51 22. Raal F, Scott R, Somaratne R, *et al*. Low-density lipoprotein cholesterol-lowering  
52  
53  
54  
55  
56  
57  
58  
59  
60



- 1  
2  
3 effects of AMG 145, a monoclonal antibody to proprotein convertase subtilisin/kexin  
4 type 9 serine protease in patients with heterozygous familial hypercholesterolemia:  
5 the Reduction of LDL-C with PCSK9 Inhibition in Heterozygous Familial  
6 Hypercholesterolemia Disorder (RUTHERFORD) randomized trial. *Circulation*.  
7 2012;126:2408-17.  
8  
9  
10  
11  
12  
13 23. Raal FJ, Stein EA, Dufour R, *et al*. PCSK9 inhibition with evolocumab (AMG 145) in  
14 heterozygous familial hypercholesterolaemia (RUTHERFORD-2): a randomised,  
15 double-blind, placebo-controlled trial. *Lancet*. 2015;385:331-40.  
16  
17  
18  
19  
20 24. Stein EA, Gipe D, Bergeron J, *et al*. Effect of a monoclonal antibody to PCSK9,  
21 REGN727/SAR236553, to reduce low-density lipoprotein cholesterol in patients with  
22 heterozygous familial hypercholesterolaemia on stable statin dose with or without  
23 ezetimibe therapy: a phase 2 randomised controlled trial. *Lancet*. 2012;380:29-36.  
24  
25  
26  
27  
28 25. Blom DJ, Hala T, Bolognese M, *et al*. A 52-week placebo-controlled trial of  
29 evolocumab in hyperlipidemia. *N Engl J Med*. 2014;370:1809-19.  
30  
31  
32  
33 26. Stroes E, Colquhoun D, Sullivan D, *et al*. Anti-PCSK9 antibody effectively lowers  
34 cholesterol in patients with statin intolerance: the GAUSS-2 randomized,  
35 placebo-controlled phase 3 clinical trial of evolocumab. *J Am Coll Cardiol*.  
36 2014;63:2541-2548.  
37  
38  
39  
40  
41 27. Raal FJ, Honarpour N, Blom DJ, *et al*. Inhibition of PCSK9 with evolocumab in  
42 homozygous familial hypercholesterolaemia (TESLA Part B): a randomised,  
43 double-blind, placebo-controlled trial. *Lancet*. 2015;385:341-50.  
44  
45  
46  
47  
48 28. Cannon CP, Cariou B, Blom D, *et al*. Efficacy and safety of alirocumab in high  
49 cardiovascular risk patients with inadequately controlled hypercholesterolaemia on  
50 maximally tolerated doses of statins: the ODYSSEY COMBO II randomized  
51 controlled trial. *Eur Heart J*. 2015;36:1186-94.  
52  
53  
54  
55  
56  
57  
58  
59  
60

- 1  
2  
3 29. Nicholls SJ, Puri R, Anderson T, *et al.* Effect of Evolocumab on Progression of  
4 Coronary Disease in Statin-Treated Patients: The GLAGOV Randomized Clinical  
5 Trial. *JAMA*. 2016;316:2373-84.  
6  
7  
8  
9 30. Baruch A, Mosesova S, Davis JD, *et al.* Effects of RG7652, a Monoclonal Antibody  
10 Against PCSK9, on LDL-C, LDL-C Subfractions, and Inflammatory Biomarkers in  
11 Patients at High Risk of or With Established Coronary Heart Disease (from the Phase  
12 2 EQUATOR Study). *Am J Cardiol*. 2017;119:1576-83.  
13  
14  
15  
16  
17 31. Ridker PM, Cushman M, Stampfer MJ, *et al.* Inflammation, aspirin, and the risk of  
18 cardiovascular disease in apparently healthy men. *N Engl J Med*. 1997; 336:973-9.  
19  
20  
21  
22 32. Everett BM, Pradhan AD, Solomon DH, *et al.* Rationale and design of the  
23 Cardiovascular Inflammation Reduction Trial: a test of the inflammatory hypothesis  
24 of atherothrombosis. *Am Heart J*. 2013;166:199-207.  
25  
26  
27  
28 33. Rost NS, Wolf PA, Kase CS, *et al.* Plasma concentration of C-reactive protein and risk  
29 of ischemic stroke and transient ischemic attack: the Framingham study. *Stroke*.  
30 2001;32:2575-9.  
31  
32  
33  
34 34. Elkind MS, Luna JM, Moon YP, *et al.* High-sensitivity C-reactive protein predicts  
35 mortality but not stroke: the Northern Manhattan Study. *Neurology*.2009;73;1300-7.  
36  
37  
38  
39 35. Li L, Roumeliotis N, Sawamura T, *et al.* C-reactive protein enhances LOX-1  
40 expression in human aortic endothelial cells: relevance of LOX-1 to C-reactive  
41 protein-induced endothelial dysfunction. *Circ Res*. 2004;95:877-83.  
42  
43  
44  
45 36. Paffen E, DeMaat MP. C-reactive protein in atherosclerosis: A causal factor?  
46 *Cardiovasc Res*. 2006;71:30-9.  
47  
48  
49  
50 37. Ridker PM, Danielson E, Fonseca FA, *et al.* Rosuvastatin to prevent vascular events in men  
51 and women with elevated C-reactive protein. *N Engl J Med*. 2008;359:2195-207.  
52  
53  
54 38. Lan H, Pang L, Smith MM, *et al.* Proprotein convertase subtilisin/kexin type 9  
55  
56  
57  
58  
59  
60

- 1  
2  
3 (PCSK9) affects gene expression pathways beyond cholesterol metabolism in liver  
4 cells. *Cell Physiol.* 2010. 224(1):273-81.  
5  
6  
7 39. Tavori H, Giunzioni I, Predazzi IM, *et al.* Human PCSK9 promotes hepatic  
8 lipogenesis and atherosclerosis development via apoE- and LDLR-mediated  
9 mechanisms. *Cardiovasc Res.* 2016;110:268-78.  
10  
11  
12  
13 40. Li S, Guo YL, Xu RX, *et al.* Association of plasma PCSK9 levels with white blood  
14 cell count and its subsets in patients with stable coronary artery disease.  
15  
16  
17  
18  
19  
20 41. Cheng JM, Oemrawsingh RM, Garcia-Garcia HM, *et al.* PCSK9 in relation to  
21 coronary plaque inflammation: Results of the ATHEROREMO-IVUS study.  
22  
23  
24  
25  
26  
27 42. Tang Z, Jiang L, Peng J, *et al.* PCSK9 siRNA suppresses the inflammatory response  
28 induced by oxLDL through inhibition of NF-kappaB activation in THP-1-derived  
29 macrophages. *Int J Mol Med.* 2012;30:931-8.  
30  
31  
32  
33 43. Tang ZH, Peng J, Ren Z, *et al.* New role of PCSK9 in atherosclerotic inflammation  
34 promotion involving the TLR4/NF-kappaB pathway. *Atherosclerosis.*  
35  
36  
37  
38  
39  
40 44. Landlinger C, Pouwer MG, Juno C, *et al.* The AT04A vaccine against proprotein  
41 convertase subtilisin/kexin type 9 reduces total cholesterol, vascular inflammation,  
42 and atherosclerosis in APOE\*3Leiden.CETP mice. *Eur Heart J.* 2017;38:2499-507.  
43  
44  
45  
46 45. Bernelot Moens SJ, Neele AE, Kroon J, *et al.* PCSK9 monoclonal antibodies reverse  
47 the pro-inflammatory profile of monocytes in familial hypercholesterolaemia. *Eur*  
48  
49  
50  
51  
52  
53  
54  
55  
56  
57  
58  
59  
60

## Tables

**Table 1.** Study characteristics of included randomized controlled trials.

| Study                          | Year | Phase | Inclusion criteria | Patients N | Arm | Mean hs-CRP at baseline mg/L | Mean age (years) | Male % | % LDL-C reduction | Drugs/control                         | Treatment duration | Jadad Score |
|--------------------------------|------|-------|--------------------|------------|-----|------------------------------|------------------|--------|-------------------|---------------------------------------|--------------------|-------------|
| RUTHERFORD <sup>22</sup>       | 2012 | II    | HeFH               | 167        | (1) | 1.09±1.37                    | 47.6             | 54.5   | 42.7              | E:350mg/PBO, Q4W                      | 12W                | 5           |
|                                |      |       |                    |            | (2) | 1.07±1.24                    | 51.8             | 62.5   | 55.2              | E:420mg/PBO, Q4W                      |                    |             |
| Stein 2012 <sup>24</sup>       | 2012 | II    | HeFH               | 77         | (1) | 1.40±1.78                    | 56.3             | 81.3   | 67.9              | A:150mg /PBO, Q2W                     | 12W                | 5           |
|                                |      |       |                    |            | (2) | 0.60±0.82                    | 51.3             | 60.0   | 28.9              | A:150mg /PBO, Q4W                     |                    |             |
|                                |      |       |                    |            | (3) | 0.70±1.48                    | 52.9             | 56.3   | 31.5              | A:200mg /PBO, Q4W                     |                    |             |
|                                |      |       |                    |            | (4) | 0.70±0.59                    | 54.3             | 46.7   | 42.5              | A:300mg /PBO, Q4W                     |                    |             |
| DESCARTES <sup>25</sup>        | 2014 | II    | HC                 | 894        | (1) | 2.00±3.70                    | 50.7             | 47.3   | 51.5              | E:420 mg/ PBO, Q4W                    | 52W                | 5           |
|                                |      |       |                    |            | (2) | 1.00±1.48                    | 57.2             | 42.9   | 54.7              | E:420 mg+ATV10 mg/ PBO, Q4W           |                    |             |
|                                |      |       |                    |            | (3) | 1.00±1.48                    | 57.8             | 52.4   | 46.7              | E:420 mg+ATV80 mg/ PBO, Q4W           |                    |             |
|                                |      |       |                    |            | (4) | 1.00±1.48                    | 54.2             | 55.6   | 46.8              | E:420 mg+ATV80 mg+ Eze10mg / PBO, Q4W |                    |             |
| GAUSS-2 <sup>26</sup>          | 2014 | III   | HC                 | 307        | (1) | 1.40±2.00                    | 61.0             | 55.3   | 56.1              | E:140 mg/ Eze, Q2W                    | 12W                | 4           |
|                                |      |       |                    |            | (2) | 1.80±1.78                    | 63.0             | 54.9   | 52.6              | E:420 mg/ Eze, Q4W                    |                    |             |
| RUTHERFORD-2 <sup>23</sup>     | 2014 | III   | HeFH               | 329        | (1) | 0.92±1.03                    | 52.6             | 40.0   | 61.3              | E:140 mg /PBO,Q2W                     | 12W                | 4           |
|                                |      |       |                    |            | (2) | 1.04±1.24                    | 51.9             | 41.8   | 55.7              | E:420 mg /PBO,Q4W                     |                    |             |
| TESLA Part B <sup>27</sup>     | 2014 | III   | HoFH               | 49         |     | 0.70±1.04                    | 31.0             | 51.5   | 23.1              | E:140 mg /PBO, Q4W                    | 12W                | 4           |
| ODYSSEY COMBO II <sup>28</sup> | 2015 | III   | HC                 | 720        | (1) | 3.58±7.78                    | 61.7             | 75.2   | 50.6              | A: 75mg /Eze, Q2W                     | 24W                | 4           |
|                                |      |       |                    |            | (2) | 3.58±7.78                    | 61.7             | 75.2   | 51.8              | A: 75mg /Eze, Q2W                     | 52W                |             |
| GLAGOV <sup>29</sup>           | 2016 | III   | HC                 | 968        |     | 1.60±1.93                    | 59.8             | 72.1   | 34.6              | E:420 mg /PBO, Q4W                    | 78W                | 4           |

|                              |      |    |    |     |     |           |      |      |      |                    |     |   |
|------------------------------|------|----|----|-----|-----|-----------|------|------|------|--------------------|-----|---|
| Kastelein 2016 <sup>20</sup> | 2016 | II | HC | 519 | (1) | 1.03±1.41 | 57.2 | 51.7 | 14.9 | LY:20mg/PBO, Q4W   | 16W | 4 |
|                              |      |    |    |     | (2) | 1.34±1.11 | 57.1 | 52.3 | 40.5 | LY:120mg/PBO, Q4W  |     |   |
|                              |      |    |    |     | (3) | 1.63±1.78 | 59.7 | 54.7 | 50.5 | LY:300mg /PBO, Q4W |     |   |
|                              |      |    |    |     | (4) | 1.39±1.70 | 59.6 | 58.1 | 14.9 | LY:100mg /PBO, Q8W |     |   |
|                              |      |    |    |     | (5) | 1.10±1.63 | 58.7 | 50.6 | 37.1 | LY:300mg /PBO, Q8W |     |   |
| EQUATOR <sup>30</sup>        | 2017 | II | HC | 168 | (1) | 1.60±2.70 | 65.0 | 57.9 | 23.3 | RG:400mg/PBO, Q4W  | 24W | 4 |
|                              |      |    |    |     | (2) | 2.00±5.90 | 64.0 | 51.0 | 44.3 | RG:800mg /PBO,Q8W  |     |   |

Data presented as mean±SD; LDL-C, low density lipoprotein-cholesterol; hs-CRP, hypersensitive C reactive protein; HC, hypercholesterolemia; HeFH, heterozygous familial hypercholesterolemia; HoFH, homozygous familial hypercholesterolemia; E, Evolocumab; A, Alirocumab; LY: LY3015014; RG, RG7652; PBO, placebo; ATV, atorvastatin; Eze, ezetimibe; W, weeks; Q2W, every 2 weeks; Q4W, every 4 weeks. N, number; SD, standard deviation.

1  
2  
3  
4 **Figure legends**  
5

6 **Figure 1.** Flow diagram of selection of studies.  
7  
8

9  
10 **Figure 2.** Forest plots depicting the effect of PCSK9-mAbs on hs-CRP.  
11

12 CI=confidence interval, PCSK9-mAb=PCSK9 monoclonal antibody, hs-CRP= hypersensitive C-reactive protein  
13  
14

15  
16 **Figure 3.** Subgroup analyses of the effect of PCSK9-mAbs on hs-CRP.  
17

18 CI=confidence interval. PCSK9-mAb=PCSK9 monoclonal antibody. hs-CRP= hypersensitive C-reactive protein.  
19

20 FH= familial hypercholesterolemia. non-FH= non-familial hypercholesterolemia.  
21  
22  
23  
24  
25  
26  
27  
28  
29  
30  
31  
32  
33  
34  
35  
36  
37  
38  
39  
40  
41  
42  
43  
44  
45  
46  
47  
48  
49  
50  
51  
52  
53  
54  
55  
56  
57  
58  
59  
60

1  
2  
3  
4  
5  
6  
7  
8  
9  
10  
11  
12  
13  
14  
15  
16  
17  
18  
19  
20  
21  
22  
23  
24  
25  
26  
27  
28  
29  
30  
31  
32  
33  
34  
35  
36  
37  
38  
39  
40  
41  
42  
43  
44  
45  
46  
47  
48  
49  
50  
51  
52  
53  
54  
55  
56  
57  
58  
59  
60



Figure 1. Flow diagram of selection of studies.

153x159mm (300 x 300 DPI)

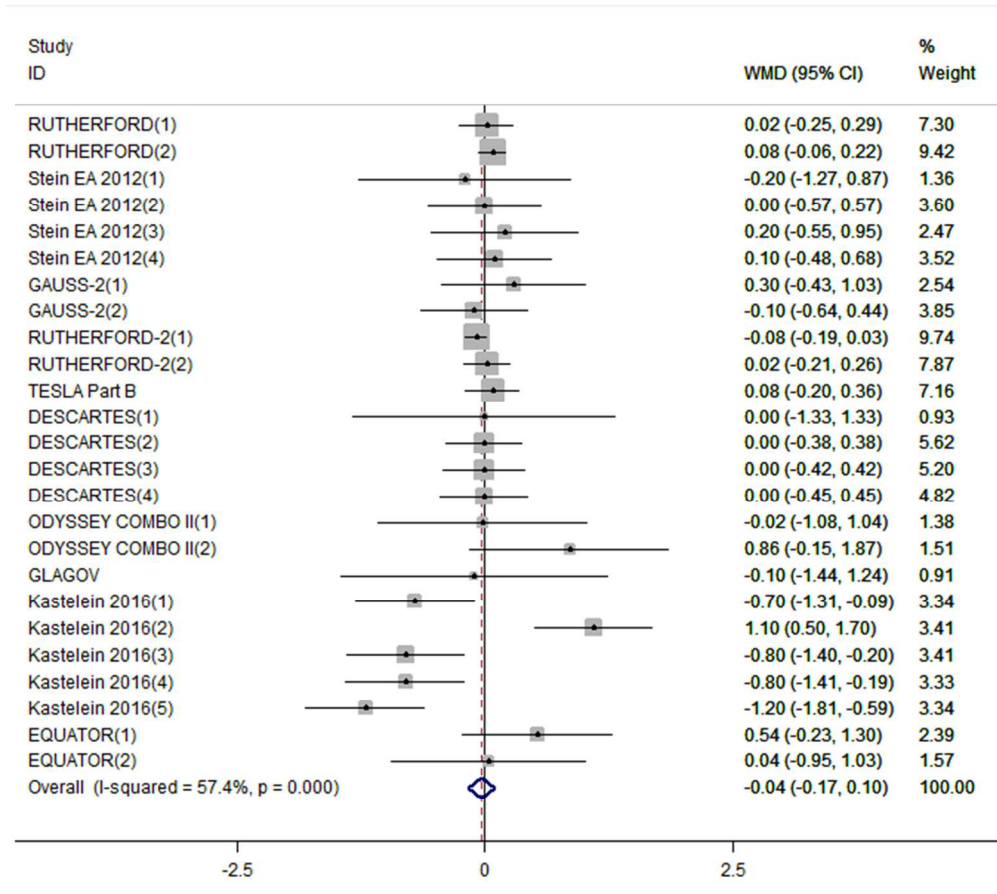

Figure 2. Forest plots depicting the effect of PCSK9-mAbs on hs-CRP. CI=confidence interval, PCSK9-mAbs=PCSK9 monoclonal antibodies, hs-CRP= hypersensitive C-reactive protein

238x213mm (300 x 300 DPI)

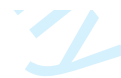



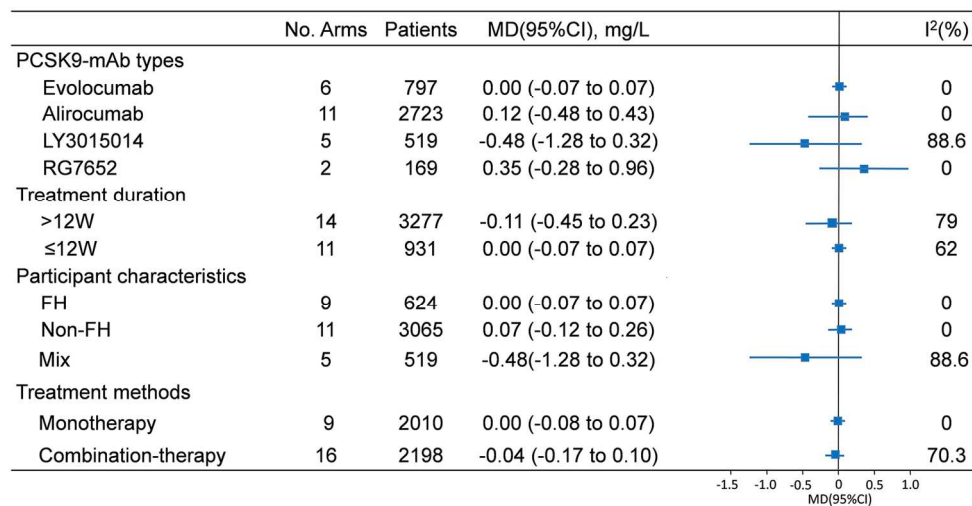

Figure 3. Subgroup analyses of the effect of PCSK9-mAbs on hs-CRP.  
 CI=confidence interval. PCSK9-mAb=PCSK9 monoclonal antibody. hs-CRP= hypersensitive C-reactive protein. FH= familial hypercholesterolemia. non-FH= non-familial hypercholesterolemia.

256x133mm (300 x 300 DPI)

## Supplementary material

**Supplemental Table 1.** Quality assessment of included studies using the Jadad scale

| Studies          | Representation of randomization | Appropriateness of method for randomization | Representation of double blinding | Appropriateness of method for double blinding | Representation of withdrawals | Total Score |
|------------------|---------------------------------|---------------------------------------------|-----------------------------------|-----------------------------------------------|-------------------------------|-------------|
| RUTHERFORD       | 1                               | 1                                           | 1                                 | 1                                             | 1                             | 5           |
| Stein EA 2012    | 1                               | 1                                           | 1                                 | 1                                             | 1                             | 5           |
| DESCARTES        | 1                               | 1                                           | 1                                 | 1                                             | 1                             | 5           |
| GAUSS-2          | 1                               | 1                                           | 1                                 | 0                                             | 1                             | 5           |
| RUTHERFORD-2     | 1                               | 1                                           | 1                                 | 0                                             | 1                             | 4           |
| TESLA Part B     | 1                               | 1                                           | 1                                 | 0                                             | 1                             | 4           |
| ODYSSEY COMBO II | 1                               | 1                                           | 1                                 | 0                                             | 1                             | 4           |
| GLAGOV           | 1                               | 1                                           | 1                                 | 0                                             | 1                             | 4           |
| Kastelein 2016   | 1                               | 1                                           | 1                                 | 0                                             | 1                             | 4           |
| EQUATOR          | 1                               | 1                                           | 1                                 | 0                                             | 1                             | 4           |

**Representation of randomization:**0, not randomized or inappropriate method of randomization; 1, the study was described as randomized.

**Appropriateness of method for randomization:** 0, no information about the method of randomization;1, the method of randomization was described and it was appropriate.

**Representation of double blinding:** 0, no blind or inappropriate method of blinding; 1, the study was described as double blinding.

**Appropriateness of method for double blinding:** 0, no information about the method of double blinding;1, the method of double blinding was described and it was appropriate.

**Withdrawals and dropouts:**0, not describe the follow-up; 1, a description of withdrawals and dropouts.

Supplementary Figure 1. Evaluation of risk of bias in the studies.

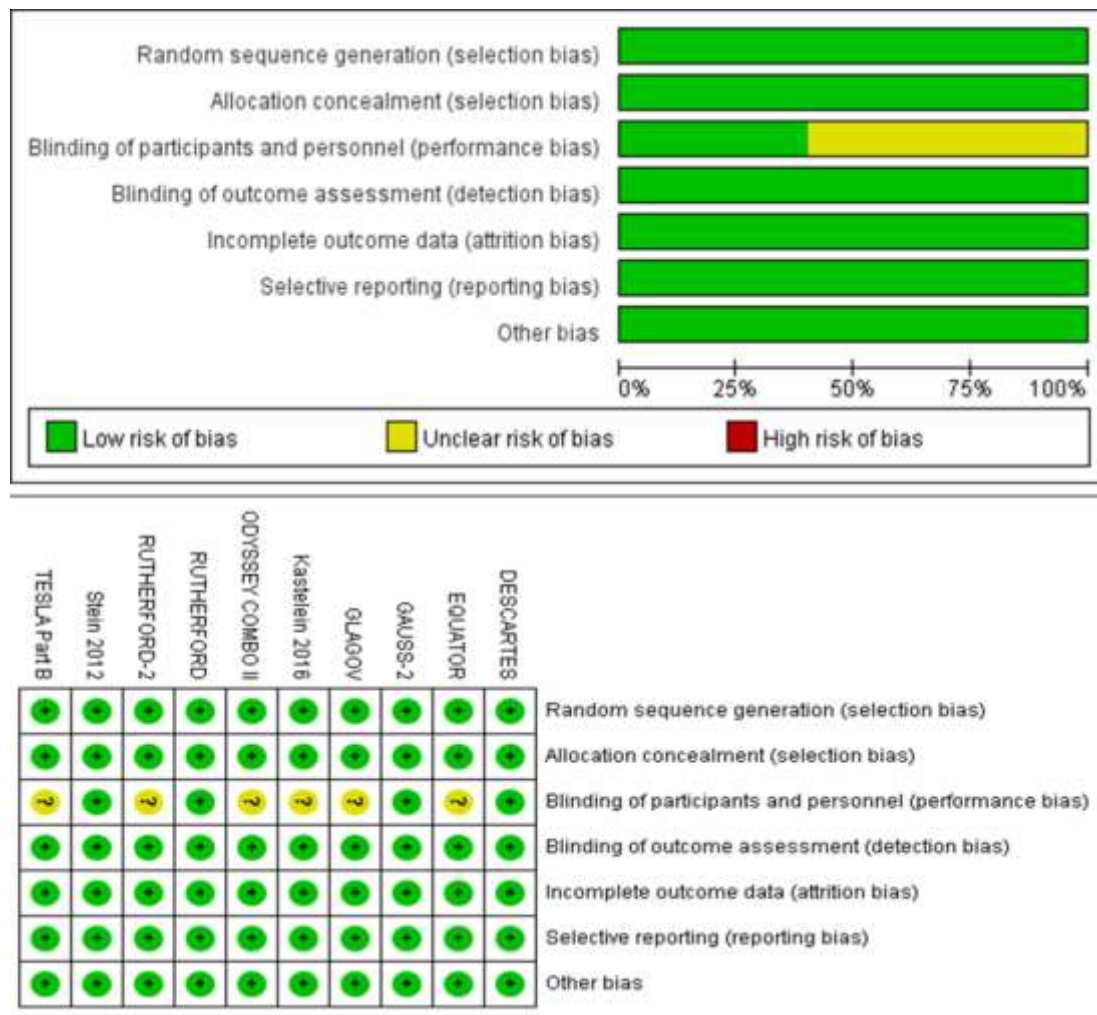

View Only

**Supplementary Figure 2.** Pooled analysis for hs-CRP stratified by PCSK9-mAb types.

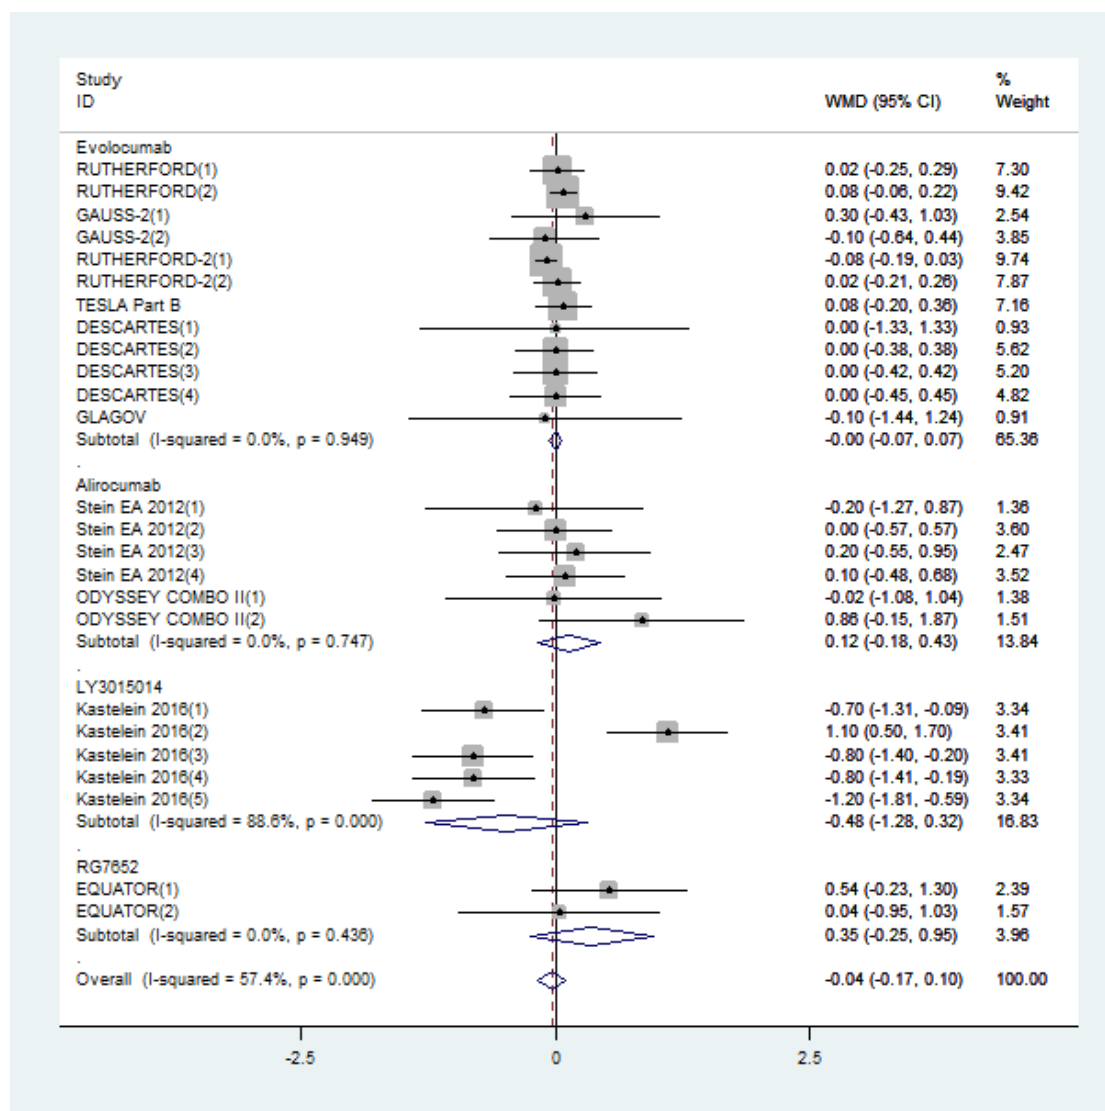

WMD= weighted mean difference, CI = confidence interval, PCSK9-mAb= proprotein convertase subtilisin/kexin type 9 monoclonal antibody, hs-CRP=hypersensitive C-reactive protein

Supplementary Figure 3. Pooled analysis for hs-CRP stratified by treatment durations.



WMD=weighted mean difference, CI = confidence interval, hs-CRP=hypersensitive C-reactive protein

Supplementary Figure 4. Pooled analysis for hs-CRP stratified by participant characteristics



WMD= weighted mean difference, CI = confidence interval, hs-CRP=hypersensitive C-reactive protein, FH=familial hypercholesterolemia, non-FH= non-familial hypercholesterolemia

Supplementary Figure 5. Pooled analysis for hs-CRP stratified by of treatment methods.

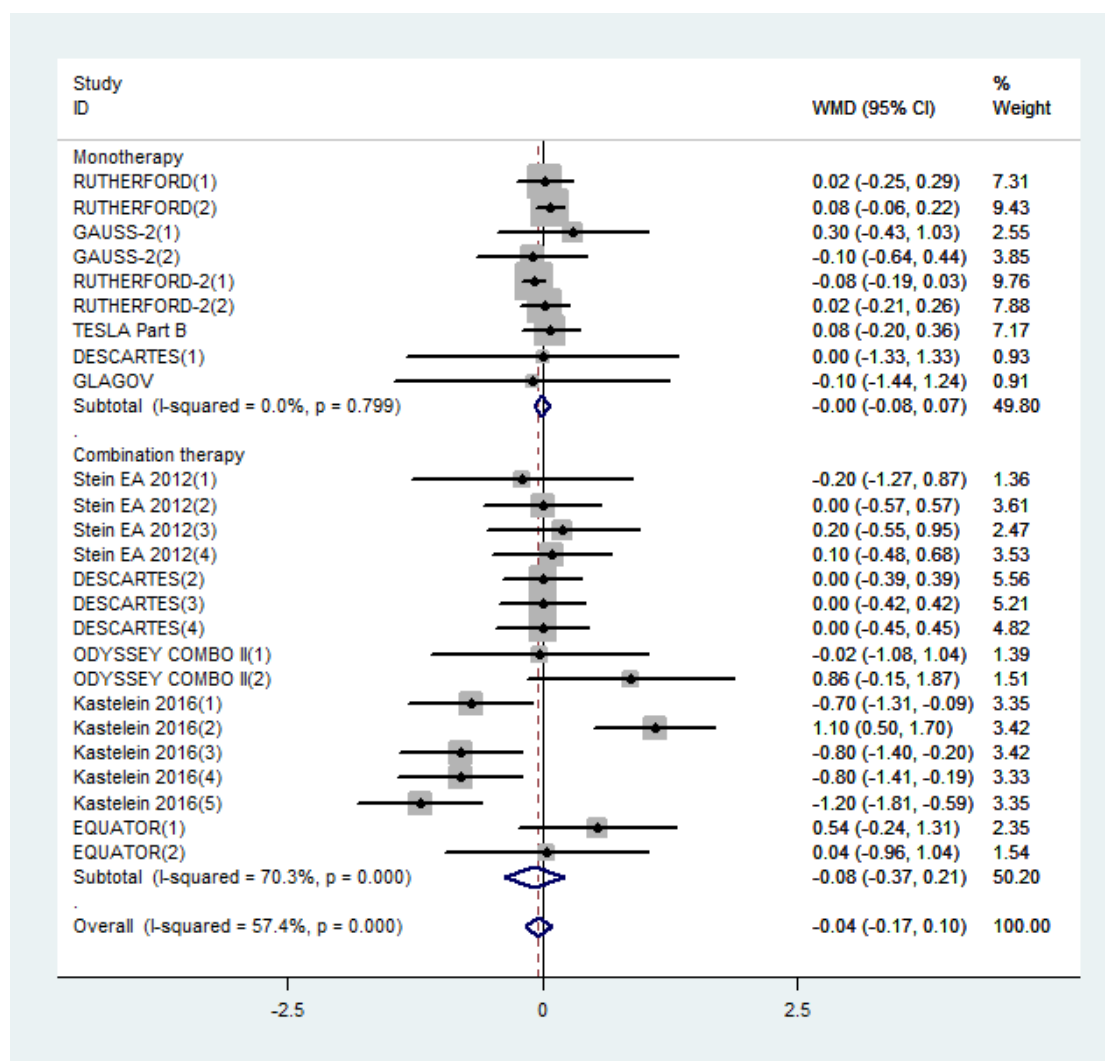

WMD=weighted mean difference, CI = confidence interval, hs-CRP=hypersensitive C-reactive protein

Supplementary Figure 6. Sensitivity analyses of hs-CRP.



hs-CRP=hypersensitive C-reactive protein

Supplementary Figure 7. Funnel Plots of included studies





Supplementary Figure 8. Meta-regression of baseline age (A), sex (B) and percent change of LDL-C (C).



LDL-C=low density lipoprotein cholesterol





# BMJ Open

## Impact of PCSK9-monoclonal antibodies on circulating hs-CRP levels: a systematic review and meta-analysis of randomized controlled trials

|                                 |                                                                                                                                                                                                                                                                                                                                                                                                                                                                                                                                                                                                                                                                                                                                                                                                                                                                          |
|---------------------------------|--------------------------------------------------------------------------------------------------------------------------------------------------------------------------------------------------------------------------------------------------------------------------------------------------------------------------------------------------------------------------------------------------------------------------------------------------------------------------------------------------------------------------------------------------------------------------------------------------------------------------------------------------------------------------------------------------------------------------------------------------------------------------------------------------------------------------------------------------------------------------|
| Journal:                        | <i>BMJ Open</i>                                                                                                                                                                                                                                                                                                                                                                                                                                                                                                                                                                                                                                                                                                                                                                                                                                                          |
| Manuscript ID                   | bmjopen-2018-022348.R2                                                                                                                                                                                                                                                                                                                                                                                                                                                                                                                                                                                                                                                                                                                                                                                                                                                   |
| Article Type:                   | Research                                                                                                                                                                                                                                                                                                                                                                                                                                                                                                                                                                                                                                                                                                                                                                                                                                                                 |
| Date Submitted by the Author:   | 22-Aug-2018                                                                                                                                                                                                                                                                                                                                                                                                                                                                                                                                                                                                                                                                                                                                                                                                                                                              |
| Complete List of Authors:       | Cao, Ye-Xuan; State Key Laboratory of Cardiovascular Disease, Fu Wai Hospital, National Center for Cardiovascular Diseases, Chinese Academy of Medical Sciences, Peking Union Medical College<br>Li, Sha; State Key Laboratory of Cardiovascular Disease, Fu Wai Hospital, National Center for Cardiovascular Diseases, Chinese Academy of Medical Sciences, Peking Union Medical College, Division of Dyslipidemia<br>Liu, Hui-Hui; State Key Laboratory of Cardiovascular Disease, Fu Wai Hospital, National Center for Cardiovascular Diseases, Chinese Academy of Medical Sciences, Peking Union Medical College, Division of Dyslipidemia<br>Li, Jian-Jun; Division of Dyslipidemia, State Key Laboratory of Cardiovascular Disease, Fuwai Hospital, National Center for Cardiovascular Diseases, Chinese Academy of Medical Sciences, Peking Union Medical College |
| <b>Primary Subject Heading</b>: | Cardiovascular medicine                                                                                                                                                                                                                                                                                                                                                                                                                                                                                                                                                                                                                                                                                                                                                                                                                                                  |
| Secondary Subject Heading:      | Pharmacology and therapeutics                                                                                                                                                                                                                                                                                                                                                                                                                                                                                                                                                                                                                                                                                                                                                                                                                                            |
| Keywords:                       | PCSK9, monoclonal antibody, hs-CRP, meta-analysis                                                                                                                                                                                                                                                                                                                                                                                                                                                                                                                                                                                                                                                                                                                                                                                                                        |
|                                 |                                                                                                                                                                                                                                                                                                                                                                                                                                                                                                                                                                                                                                                                                                                                                                                                                                                                          |

SCHOLARONE™  
Manuscripts

1  
2  
3 **Revised-bmjopen-2018-022348.R2**

2018-08-21

4  
5  
6  
7 **Title:** Impact of PCSK9-monoclonal antibodies on circulating hs-CRP levels: a systematic  
8 review and meta-analysis of randomized controlled trials  
9

10  
11  
12 **Running Title:** PCSK9-mAb and hs-CRP  
13

14  
15  
16  
17 **Authors:** Ye-Xuan Cao, MD\*, Sha Li, MD, PhD\*, Hui-Hui Liu, MD\*, Jian-Jun Li, MD, PhD\*  
18  
19

20  
21  
22  
23 **Affiliations:** \*Division of Dyslipidemia, State Key Laboratory of Cardiovascular Disease, Fu  
24 Wai Hospital, National Center for Cardiovascular Diseases, Chinese Academy of Medical  
25 Sciences, Peking Union Medical College, BeiLiShi Road 167, Beijing 100037, China.  
26  
27  
28

29  
30  
31  
32  
33 **Correspondence:** Professor Jian-Jun Li, MD, PhD, FESC, FACC. Division of Dyslipidemia,  
34 State Key Laboratory of Cardiovascular Disease, Fu Wai Hospital, National Center for  
35 Cardiovascular Diseases, Chinese Academy of Medical Sciences, Peking Union Medical  
36 College, BeiLiShi Road 167, Beijing 100037, China. Tel: 86+10+88396077; Fax:  
37 86+10+88396584. E-mail: [lijianjun938@126.com](mailto:lijianjun938@126.com).  
38  
39  
40  
41  
42  
43

44  
45  
46  
47 **Total word count:** 2673  
48

49  
50 **Number of tables/figures:** tables 1; figures 3  
51  
52  
53  
54  
55  
56

## ABSTRACT

**Objective** To evaluate the potential effects of proprotein convertase subtilisin/kexin type 9 monoclonal antibody (PCSK9-mAb) on high-sensitivity C-reactive (hs-CRP) concentrations.

**Design** A systematic review and meta-analysis of randomized controlled trials.

**Data sources** PubMed, MEDLINE, The Cochrane Library databases, ClinicalTrials.gov and recent conferences were searched from inception to May 2018.

**Eligibility criteria for selecting studies** All randomized controlled trials that reported changes of hs-CRP were included.

**Results** Ten studies involving 4198 participants were identified. PCSK9-mAbs showed a slight efficacy in reducing hs-CRP (-0.04mg/L, 95%CI:-0.17 to 0.01) which was not statistically different. The results did not altered when subgroup analyses were performed including PCSK9-mAb types (Alirocumab:0.12mg/L, 95% CI:-0.18 to 0.43; Evolocumab:0.00 mg/L, 95% CI:-0.07 to 0.07; LY3015014:-0.48mg/L, 95% CI:-1.28 to 0.32; RG7652:0.35mg/L, 95% CI:-0.26 to 0.96), treatment duration ( $\leq 12$ w:0.00mg/L, 95% CI:-0.07 to 0.07;  $>12$ w: -0.11mg/L, 95% CI:-0.45 to -0.23), participant characteristics (familial hypercholesterolemia: 0.00mg/L, 95% CI:-0.07 to 0.07; non-familial hypercholesterolemia:0.07mg/L, 95% CI:-0.12 to 0.26; mix:-0.48mg/L, 95%CI:-1.28 to 0.32) and treatment methods (monotherapy: 0.00mg/L, -0.08 to 0.07; combination-therapy: -0.08mg/L, -0.37 to 0.21). Meta-regression analyses suggested no significant linear correlation between baseline age ( $p=0.673$ ), sex ( $p=0.645$ ), and low-density lipoprotein cholesterol reduction ( $p=0.339$ ).

**Conclusions** Our updated meta-analysis suggested that PCSK9-mAbs had no significant impact on circulating hs-CRP levels irrespective of PCSK9-mAb types, participant characteristics, and treatment duration or methods.

1  
2  
3 **Keywords:** PCSK9; monoclonal antibody; hs-CRP; meta-analysis  
4

5 **Strengths and limitations of this study**  
6

- 7 ● This is a comprehensive systematic review and meta-analysis that gives an overview of  
8 the effect of proprotein convertase subtilisin/kexin type 9 monoclonal antibody  
9 (PCSK9-mAb) on inflammation.  
10  
11  
12  
13 ● An extensive systematic literature search identified all available randomized controlled  
14 trials that reported the changes of high-sensitivity C-reactive protein using PCSK9-mAb.  
15  
16  
17  
18 ● Studies with moderate heterogeneity and lack of individual level data may limit the  
19 quality of evidence for this meta-analysis.  
20  
21  
22  
23  
24  
25  
26  
27  
28  
29  
30  
31  
32  
33  
34  
35  
36  
37  
38  
39  
40  
41  
42  
43  
44  
45  
46  
47  
48  
49  
50  
51  
52  
53  
54  
55  
56  
57  
58  
59  
60

## Introduction

Cardiovascular disease is the greatest burden of global health, which is mainly characterized by atherosclerosis<sup>1</sup>. Atherosclerosis is a chronic and progressive inflammatory disease, including endothelial dysfunction, lipid accumulation in the arterial wall and leukocyte infiltration, which leads to luminal stenosis, plaque rupture and acute coronary syndrome (ACS)<sup>2</sup>. Apart from well-established lipid theory, inflammation also plays an important role in the initiation and progression of atherosclerosis<sup>3</sup>. Recently, the Canakinumab Antiinflammatory Thrombosis Outcome Study (CANTOS) reported that anti-inflammatory therapy by canakinumab, a therapeutic monoclonal antibody targeting interleukin-1 $\beta$ , significantly reduced the primary cardiovascular end points<sup>4</sup>. This study attracted attention to the inflammation intervention in cardiovascular medicine again.

C-reactive protein (CRP), especially high-sensitivity CRP (hs-CRP), is the most intensively investigated inflammatory biomarker in cardiovascular field<sup>5</sup>. Increasing studies have confirmed that hs-CRP is a predictor for the progression of atherosclerotic disease and future major adverse cardiovascular events (MACE)<sup>6,7</sup>. Moreover, previous studies also indicated that hs-CRP played a direct role in the progression of atherosclerosis<sup>8,9</sup>. Therefore, reduction of inflammatory markers such as hs-CRP may be a strategy for decreasing MACE<sup>10,11</sup>.

Proprotein convertase subtilisin/kexin type 9 (PCSK9) is known to target low-density lipoprotein receptor (LDLR) for degradation resulting in elevated plasma low-density lipoprotein cholesterol (LDL-C) levels<sup>12-14</sup>. Recently, it has been reported that PCSK9 monoclonal antibody (PCSK9-mAb), as a novel lipid-lowering drug, can reduce LDL-C by a mean of 70% accompanied with reduction of MACE<sup>15</sup>. Although the relation of PCSK9 to LDL-C has been established, its role in inflammation has not been fully understood. Several



1  
2  
3 experimental studies found that PCSK9 could promote the progression of atherosclerosis by  
4 enhancing inflammatory reaction<sup>16</sup>. On the other hand, PCSK9 deficiency could alleviate the  
5 inflammation reaction<sup>17</sup>. Hence, whether PCSK9-mAb can reduce inflammatory marker is  
6 clinically of great interest since it was used to treat cardiovascular diseases. A meta-analysis  
7 covering 7 randomized controlled trials (RCTs) studies published two years ago suggested  
8 that PCSK9-mAbs had no effect on serum hs-CRP<sup>18</sup>. However, this meta-analysis may be  
9 limited by insufficient subgroup analyses, sample size, and lack of newly published data<sup>19,20</sup>.  
10 Hence, we performed this meta-analysis including all RCTs published till May 2018 to  
11 further explore the efficacy of PCSK9-mAbs on circulating hs-CRP levels.  
12  
13  
14  
15  
16  
17  
18  
19  
20  
21  
22  
23

## 24 **Methods**

### 25 *Literature search*

26  
27 The present study is reported according to the guidelines of the 2009 Preferred Reporting  
28 Items for Systematic Reviews and Meta Analyses (PRISMA) statement<sup>21</sup>. To identify all  
29 RCTs assessing the effect of PCSK9-mAbs on circulating hs-CRP levels, we  
30 comprehensively searched PubMed, MEDLINE, and the Cochrane Library database and  
31 ClinicalTrials.gov up until May 2018. The search terms we used included the followings:  
32 (AMG145 or Evolocumab or REGN727 or SAR236553 or Alirocumab or RN316 or  
33 bococizumab or RG7652 or LY3015014 or PCSK9 antibody or anti-PCSK9) AND  
34 (randomized controlled trial OR randomized OR randomly). Meanwhile, manual search was  
35 performed for relevant studies including references lists, relevant review articles and  
36 commentaries (see online supplementary Appendix 1). No language restriction was used.  
37  
38  
39  
40  
41  
42  
43  
44  
45  
46  
47  
48  
49  
50  
51

### 52 *Study selection*

53  
54 Original studies met the following criteria would be included: the design was phase 2 or  
55  
56  
57  
58  
59  
60

1  
2  
3 phase 3 double-blind RCTs with longer than 8 weeks treatment duration; human participants  
4 were randomly assigned to PCSK9-mAbs group versus control group with or without other  
5 lipid-lowering therapy; outcomes included percentage changes of hs-CRP from baseline.  
6  
7 Studies were excluded if they were duplicate publications, review articles, non-human studies,  
8  
9 observational studies, and lack of adequate information on outcomes or lacking control group.  
10  
11 Two investigators (YC and SL) independently screened and selected the eligible studies.  
12  
13 Disagreements were resolved by discussion with a third investigator.  
14  
15  
16  
17  
18  
19

### 20 ***Data Extraction***

21  
22 A standardized extraction form was used to extract the following items by two investigators  
23 (YC and HL) independently: trial name/first author, year of publication, type of intervention,  
24 follow-up period, treatment duration, number of patients, participant characteristics,  
25 background lipid-lowering therapy, types and doses of PCSK9-mAbs, LDL-C and hs-CRP  
26 levels at baseline and changes. We included the final reported follow-up point if a trial  
27 contains several time points. If necessary, further information was required from  
28 correspondence author.  
29  
30  
31  
32  
33  
34  
35  
36  
37  
38  
39

### 40 ***Quality Assessment***

41  
42 We used Cochrane Collaboration's tool and Jadad score to assess the data and the  
43 methodological quality of included RCTs. For Cochrane Collaboration's tool, the following  
44 items were performed: random sequence generation (selection bias), allocation concealment  
45 (selection bias), blinding of participants and personnel (performance bias), blinding of  
46 outcome assessment (detection bias), incomplete outcome data (attrition bias), selective  
47 reporting (reporting bias), and other sources of bias. The judgments were classified as 'low  
48 risk', 'high risk', and 'unclear risk' of bias. The 5-point Jadad score included the following  
49  
50  
51  
52  
53  
54  
55  
56  
57  
58  
59  
60

1  
2  
3 items: basis of randomization (0 to 2 points), double blinding (0 to 2 points), and withdrawals  
4 /dropouts (0 to 1 points). Studies with a score  $\geq 3$  points are considered to be high quality.  
5  
6  
7 Two investigators (YC and HL) independently assessed the quality of each study.  
8  
9 Disagreements were resolved by discussion with a third investigator.  
10

### 11 12 13 ***Data Synthesis and Statistical Analysis*** 14

15 All analyses were conducted according to the intention-to-treat principles. For all efficacy  
16 outcomes, changes in hs-CRP concentrations were expressed as weighted mean difference  
17 (WMD) and 95% confidence interval (CI). All the data were standardized and expressed by  
18 mg/mL. Standard deviation could be calculated from CI, interquartile range or standard error  
19 according to formulas in the Cochrane Handbook for Systematic Reviews of Interventions if  
20 not reported.  
21  
22  
23  
24  
25  
26  
27

28 Heterogeneity was assessed by the Cochran Q test and the  $I^2$  statistic. We considered  
29  $I^2 < 25\%$  as representing low heterogeneity and  $I^2 > 75\%$  as representing at high heterogeneity.  
30  
31 Outcomes were calculated by fixed-effects models under no or low to moderate inconsistency  
32 ( $I^2 < 50\%$ ); otherwise, the data was pooled based on random-effects models. Subgroups were  
33 applied to reduce the heterogeneity if  $I^2 \geq 50\%$ , such as PCSK9-mAb types, treatment  
34 duration, and participant characteristics. In order to explore the resource of heterogeneity,  
35 sensitivity analysis was conducted by omitting studies in turn to evaluate the consistency of  
36 the results. Meta-regression analyses were performed to evaluate the contribution of  
37 participant characteristics and reductions in LDL-C concentrations. Publication bias was  
38 assessed with a funnel plot and Egger's test.  
39  
40  
41  
42  
43  
44  
45  
46  
47  
48  
49

50 All analyses were conducted with Review Manager Version 5.3 (Copenhagen: The  
51 Nordic Cochrane Centre, The Cochrane Collaboration, Denmark) and Stata 14.0 (Stata  
52 Statistical Software: College Station, TX: Stata Corp LP). P value  $< 0.05$  was considered to be  
53  
54  
55  
56

1  
2  
3 statistically significant.  
4  
5

### 6 7 ***Patient and public involvement statement*** 8

9 Participants and the public sector were not directly involved in the design and conduct of this  
10 study.  
11  
12

## 13 14 15 **Results**

### 16 17 ***Study selection and Characteristics*** 18

19 The initial search identified 575 articles. After excluding duplicate publications and screening  
20 the titles and abstracts, 430 were excluded and 145 studies were retrieved for full-text  
21 identification. We further excluded 135 studies, of which 58 were pooled or meta-analysis, 2  
22 studies were not RCTs and 13 was phase 1 trials, 16 were open label trails and 42 without  
23 adequate information. Finally, ten studies were included in this meta-analysis<sup>20,22-30</sup>. Figure 1  
24 shows flow diagram of selection process.  
25  
26  
27  
28  
29  
30  
31  
32

33 These ten studies were published between 2012 and 2017 from different countries with  
34 low risk of bias, of which 5 were phase 2 studies and 5 were phase 3 studies (Table 1). A total  
35 of 4198 participants were included, comprising 2728 individuals in the PCSK9-mAb group  
36 and 1470 in the control group. Alirocumab (SAR236553/REGN727) was used in 4 arms and  
37 11 arms applied Evolocumab (AMG 145). Five arms managed LY3015014 and 2 arms used  
38 RG7652. Four trials included patients with familial hypercholesterolemia (FH), of which 3  
39 were heterozygous FH (HeFH) and 1 was homozygous FH (HoFH). Most of the treatment  
40 duration ranged from 12 to 24 weeks and the longest treatment duration was 78 weeks. Apart  
41 from DESCARTES trial which co-administered with atorvastatin, another 9 studies used  
42 PCSK9-mAb as monotherapy. Baseline characteristics including circulating hs-CRP levels  
43 were similar between PCSK9-mAbs and control groups within each study. The characteristics  
44  
45  
46  
47  
48  
49  
50  
51  
52  
53  
54  
55  
56  
57  
58  
59  
60

1  
2  
3 of these trials and participants are summarized in Table 1. All these studies had a relatively  
4 high quality evaluated by the Jadad score and low risk of bias (online supplementary Table 1  
5 and online supplementary Figure 1, 3 scores=5, 6 scores=4).  
6  
7  
8  
9

### 11 ***Efficacy outcomes of PCSK9-mAbs on hs-CRP***

12  
13 A total of 4198 participants were included in the analysis of efficacy of PCSK9-mAbs on  
14 plasma hs-CRP concentrations before and after treatment. When data were pooled,  
15 PCSK9-mAbs showed a slight efficacy in reducing hs-CRP (WMD: -0.04mg/L, 95%CI: -0.17  
16 to 0.01), while no statistical difference was found compared with control treatment (Figure 2).  
17  
18 There was a moderate heterogeneity between each study ( $I^2=57.4%$ ,  $p=0.0001$ ), so the  
19 random-effect model was selected.  
20  
21  
22  
23  
24  
25

26 To assess the potential discrepancy, we applied the subgroup analyses based on the  
27 characteristics of trials and participants (Figure 3 and online supplementary Figures 2-5).  
28 Although the efficacy of LY3015014 was a mild higher (-0.48 mg/L, 95% CI:-1.28 to 0.32),  
29 there was no difference between these four antibodies (Alirocumab: 0.12 mg/L, 95% CI:  
30 -0.18 to 0.43; Evolocumab: 0.00 mg/L, 95% CI: -0.07 to 0.07; RG7652: 0.35 mg/L, 95% CI:  
31 -0.26 to 0.96). When studies were classified by treatment duration, the hs-CRP reduction  
32 showed no difference in less than 12-week duration group (0.00 mg/L, 95% CI: -0.07 to 0.07)  
33 and above 12-week duration group (-0.11mg/L, 95% CI: -0.45 to -0.23). There was no  
34 significant reduction in circulating hs-CRP with use of PCSK9 antibodies compared with  
35 control treatment when categorized to participant characteristics (FH: 0.00 mg/L, 95% CI:  
36 -0.07 to 0.07; non-FH: 0.07 mg/L, 95% CI: -0.12 to 0.26; mix: -0.48 mg/L, 95%CI: -1.28 to  
37 0.32). The analysis stratified by treatment method also supported the results that no  
38 differential effect of PCSK9-mAb therapy on plasma hs-CRP concentrations was observed  
39 (monotherapy: 0.00 mg/L, 95%CI: -0.08 to 0.07 vs combination-therapy: -0.08 mg/L, 95%CI:  
40  
41  
42  
43  
44  
45  
46  
47  
48  
49  
50  
51  
52  
53  
54  
55  
56  
57  
58  
59  
60

1  
2  
3 -0.37 to 0.21).  
4  
5

### 6 7 ***Sensitivity analysis and publication bias*** 8

9 The sensitivity analysis for all outcomes was conducted by gradually removing each study.  
10 However, the results did not change meaningfully (online supplementary Figure 6). Neither  
11 funnel plots (online supplementary Figure 7) nor Egger's regression test ( $p=0.913$ ) showed  
12 publication bias.  
13  
14  
15  
16  
17

### 18 19 20 ***Meta-regression analyses*** 21

22 We used meta-regression analyses to assess the relationship between changes in hs-CRP and  
23 baseline age, sex, and average LDL-C changes (online supplementary Figure 8). No  
24 statistically significant relationship between baseline age ( $p=0.673$ ), male sex ( $p=0.645$ ), and  
25 hs-CRP changes were observed. Likewise, LDL-C lowering effects by PCSK9-mAb therapy  
26 had no impact on hs-CRP lowering ( $p=0.339$ , online supplementary Figure 8).  
27  
28  
29  
30  
31  
32  
33  
34

### 35 **Discussion** 36

37 The results of this updated, comprehensive meta-analysis, based on 10 RCTs encompassing  
38 4198 participants, suggested that short-term PCSK9-mAb therapy had no impact on  
39 circulating hs-CRP concentrations. In the subgroup analyses, no difference was found  
40 between PCSK9-mAb types, participant characteristics, and treatment duration or methods.  
41  
42  
43  
44

45  
46 Atherosclerosis, a chronic progressive disorder, is characterized by lipid accumulation  
47 and chronic inflammation in the arterial wall<sup>2</sup>. Although previous data indicated a positive  
48 effects of anti-inflammatory drugs on atherosclerosis in animal studies but no positive data  
49 was available in human studies<sup>31</sup>. Fortunately, recent evidence from CANTOS found that  
50 canakinumab significantly reduced hs-CRP levels and MACE after follow-up of 3.7 years  
51  
52  
53  
54  
55  
56

1  
2  
3 which may support the inflammatory hypothesis of atherosclerosis<sup>4</sup>. Moreover, ongoing  
4  
5 Cardiovascular Inflammation Reduction Trial (CIRT) was also designed to directly test the  
6  
7 inflammatory hypothesis of atherosclerosis by evaluating the effect of methotrexate on  
8  
9 adverse cardiovascular outcomes without substantive impact on lipids<sup>32</sup>. Hence, focusing on  
10  
11 inflammation in the development of atherosclerosis may be an unsolved issue and great of  
12  
13 interest clinically.  
14

15  
16 In fact, increasing studies indicated that hs-CRP could independently predict MACE<sup>6</sup>.  
17  
18 Framingham study found that men and women in the highest quartile of CRP respectively  
19  
20 had twice and three-times the risk of stroke compared with those in the lowest ones after  
21  
22 more than 10-years follow-up<sup>33</sup>. The Northern Manhattan Study reported that >3 mg/L CRP  
23  
24 was associated with a 1.7-fold increase in cardiovascular outcomes and a 1.55-fold increase  
25  
26 in mortality<sup>34</sup>. Furthermore, it has been demonstrated that hs-CRP also plays a direct and vital  
27  
28 role in the development of atherosclerosis. Zwaka et al<sup>8</sup> found that CRP enhanced the  
29  
30 transformation from macrophages to foam cells by increasing the uptake of LDL-C. CRP was  
31  
32 also reported to impair vasodilatation, inhibit the synthesis of nitric oxide synthase, and  
33  
34 facilitate the adhesion of monocyte<sup>35,36</sup>. Based on these evidence, reduction of hs-CRP may  
35  
36 be associated with a decrease in MACE. Interestingly, the JUPITER study applied  
37  
38 rosuvastatin on individuals with LDL-C levels below 130 mg/dL and hs-CRP levels  $\geq 2$  mg/L,  
39  
40 and suggested a significant reduction in all vascular events<sup>37</sup>. Although a fact that statins  
41  
42 lower LDL-C and proportionately reduce MACE is widely accepted, the hs-CRP reduction by  
43  
44 statin administration is also an attractive phenomenon, called as pleiotropic effect of statin.  
45  
46 That is the reason why we chose hs-CRP as an inflammatory biomarker to identify whether  
47  
48 PCSK9-mAb has an effect on inflammatory status.  
49  
50  
51

52  
53 Although the relationship between PCSK9 and LDL-C was well-established, more and  
54  
55 more evidence demonstrated its function beyond lipids. In 2010, microarray gene expression  
56  
57

1  
2  
3 analysis suggested that PCSK9 affected not only cholesterol metabolism, but also  
4 inflammation<sup>38</sup>. Experimental studies indicated that PCSK9 could participate in vascular and  
5 systemic inflammation<sup>16</sup>. In transgenic mice expressing human PCSK9 gene, Tavori et al<sup>39</sup>  
6 observed that atherosclerosis lesion size and local Ly6C<sup>hi</sup> monocytes, the precursors of  
7 pro-inflammatory M1 macrophages, significantly increased. Clinical studies further  
8 supported this hypothesis. Our previous study found that serum PCSK9 concentrations were  
9 independently associated with white blood cell count in patients with stable coronary artery  
10 disease, indicating PCSK9 might be involved in the inflammation process<sup>40</sup>.  
11 ATHEROREMO-IVUS study reported a positive linearly association between PCSK9 levels  
12 and coronary plaque inflammation including amount of necrotic core tissue and plaque  
13 volume<sup>41</sup>. On the other hand, data also showed that PCSK9 inhibition could exert an  
14 anti-inflammatory effect. Tang et al<sup>42</sup> reported that PCSK9 small interfering RNA reduced the  
15 expression of pro-inflammatory genes through nuclear factor kappa B (NF- $\kappa$ B) pathway. In  
16 apoE-/- mice, PCSK9 silencing limited the development of atherosclerosis and decreased the  
17 number of macrophages via TLR4/NF- $\kappa$ B signaling pathway<sup>43</sup>. Besides, AT04A anti-PCSK9  
18 vaccine also got the same results that anti-PCSK9 therapy could reduce vascular  
19 inflammation<sup>44</sup>. Recently, Bernelot et al<sup>45</sup> found that after 24 weeks of treatment with  
20 PCSK9-mAbs, the migratory capacity of monocytes and inflammatory responsiveness  
21 reduced significantly while anti-inflammatory cytokine levels increased in FH patients.  
22 Therefore, we hypothesized that PCSK9-mAbs treatment could reduce hs-CRP in randomized  
23 clinical studies. Unfortunately, in our meta-analysis the results showed that PCSK9-mAbs  
24 therapy had no effect on decreasing hs-CRP in both FH participants and non-FH individuals.  
25  
26  
27  
28  
29  
30  
31  
32  
33  
34  
35  
36  
37  
38  
39  
40  
41  
42  
43  
44  
45  
46  
47  
48  
49

50 To explore the potential reasons why PCSK9-mAbs therapy was not benefit from  
51 inflammatory marker, named as the reduction of circulating hs-CRP levels, we further  
52 performed subgroup analyses. Firstly, we did not observe an impact of PCSK9-mAbs types  
53  
54  
55  
56  
57  
58  
59  
60



1  
2  
3 on hs-CRP, which may exclude the influence of PCSK9-mAbs itself on the inflammatory  
4 marker in our meta-analysis. Besides, the same results were also observed in combination of  
5 statins and PCSK9-mAbs group, suggesting that the effects of PCSK9-mAbs therapy on  
6 hs-CRP is not linked with treatment methods. It is notable that the participants in JUPITER  
7 trial had high levels of hs-CRP at baseline, while in PCSK9-mAb therapy, initial hs-CRP  
8 levels were at normal range in recruited individuals. Finally, we did not find a positive effects  
9 of PCSK9-mAbs therapeutic duration on hs-CRP in this updated analysis. Taken together, we  
10 may conclude that although PCSK9-mAbs had a powerful ability in lowering LDL-C, they  
11 had no impact on circulating hs-CRP concentration despite of PCSK9-mAb types, participant  
12 characteristics, and treatment duration or methods.  
13  
14  
15  
16  
17  
18  
19  
20  
21  
22  
23  
24  
25

### 26 **Limitations**

27  
28 There were several limitations in our meta-analysis. Firstly, our results were based on study  
29 data but not individual data as in most meta-analyses. Secondly, although our meta-analysis is  
30 an updated one, it is still limited by study numbers, sample size, and therapy duration.  
31 Moreover, moderate degree of heterogeneity was observed in several comparisons. However,  
32 there was no publication bias and the results were rather consistent among different  
33 subgroups. Sensitivity analysis suggested that the pooled WMD were robust. Finally, some  
34 studies included in this meta-analysis did not provide adequate information about blinding of  
35 participants and personnel.  
36  
37  
38  
39  
40  
41  
42  
43  
44  
45  
46  
47

### 48 **Conclusions**

49  
50 In conclusion, the current updated evidence suggested that PCSK9-mAb, a novel powerful  
51 lipid-lowering drug, had no significant impact on circulating hs-CRP concentrations, whose  
52 effect did not influenced by PCSK9-mAb types, participant characteristics, and treatment  
53  
54  
55  
56  
57  
58  
59  
60

1  
2  
3 duration or methods. Long-term observation may be needed.

#### 4 **Acknowledgements**

5  
6  
7 Not any.

#### 10 11 **Contributors**

12  
13 JJJ contributed to conception and design, acquisition, analysis, and interpretation, and  
14 critically revised the manuscript. YXC contributed to design, acquisition, analysis, and  
15 interpretation and drafted the manuscript. SL contributed to acquisition, analysis, and  
16 critically revised the manuscript. HHL contributed to analysis, interpretation and critically  
17 revised the manuscript. All the authors read and approved the final version of the manuscript.  
18  
19  
20  
21  
22  
23  
24  
25

#### 26 27 **Funding**

28 This work was partially supported by the Capital Health Development Fund (201614035) and  
29 CAMS Major Collaborative Innovation Project (2016-I2M-1-011) awarded to Dr. Jian-Jun Li,  
30 MD, PhD. The sponsors had no role in the decision to conduct the meta-analyses, data  
31 analysis, or reporting of the results.  
32  
33  
34  
35  
36  
37  
38  
39

40 **Competing interests:** None declared.

41  
42  
43  
44 **Patient consent:** Not required.

45  
46  
47  
48 **Ethics approval:** This research is exempt from ethical approval.

49  
50  
51  
52 **Data sharing statement:** No additional data available.

**Reference**

1. Mathers CD, Loncar D. Projections of global mortality and burden of disease from 2002 to 2030. *PLoS Med*. 2006;3:e442.
2. Ross R. Atherosclerosis--an inflammatory disease. *N Engl J Med*. 1999;340:115-26.
3. Packard RR, Libby P. Inflammation in atherosclerosis: from vascular biology to biomarker discovery and risk prediction. *Clin Chem*. 2008;54:24-38.
4. Ridker PM, Everett BM, Thuren T, *et al*. Antiinflammatory Therapy with Canakinumab for Atherosclerotic Disease. *N Engl J Med*. 2017;377:1119-31.
5. Li JJ, Fang CH. C-reactive protein is not only an inflammatory marker but also a direct cause of cardiovascular diseases. *Med Hypotheses*. 2004;62:499-506.
6. Li JJ, Li S, Zhang Y, *et al*. Proprotein Convertase Subtilisin/Kexin type 9, C-Reactive Protein, Coronary Severity, and Outcomes in Patients With Stable Coronary Artery Disease: A Prospective Observational Cohort Study. *Medicine*. 2015;94:e2426.
7. Wang A, Liu J, Li C, *et al*. Cumulative Exposure to High-Sensitivity C-Reactive Protein Predicts the Risk of Cardiovascular Disease. *J Am Heart Assoc*. 2017; 6:e005610.
8. Zwaka TP, Hombach V, Torzewski J. C-reactive protein-mediated low density lipoprotein uptake by macrophages: implications for atherosclerosis. *Circulation*. 2001;103:1194-7.
9. Zhang YX, Cliff WJ, Schoefl GI, *et al*. Coronary C-reactive protein distribution: its relation to development of atherosclerosis. *Atherosclerosis*. 1999;145:375-9.
10. Li JJ, Fang CH. Effects of 4 weeks of atorvastatin administration on the antiinflammatory cytokine interleukin-10 in patients with unstable angina. *Clin Chem*. 2005;51:1735-8.

11. Li JJ, Li YS, Fang CH, *et al.* Effects of simvastatin within two weeks on anti-inflammatory cytokine interleukin 10 in patients with unstable angina. *Heart*. 2006;92:529-30.
12. Cui CJ, Li S, Li JJ. PCSK9 and its modulation. *Clin Chim Acta*. 2015;440:79-86.
13. Li S, Li JJ. PCSK9: A key factor modulating atherosclerosis. *J Atheroscler Thromb*. 2015;22:221-30.
14. Li S, Zhang Y, Xu RX, *et al.* Proprotein convertase subtilisin-kexin type 9 as a biomarker for the severity of coronary artery disease. *Ann Med*. 2015;47:386-93.
15. Roth EM, McKenney JM, Hanotin C, *et al.* Atorvastatin with or without an antibody to PCSK9 in primary hypercholesterolemia. *N Engl J Med*. 2012;367:1891-900.
16. Giunzioni I, Tavori H, Covarrubias R, *et al.* Local effects of human PCSK9 on the atherosclerotic lesion. *J Pathol*. 2016;238:52-62.
17. Kuhnast S, van der Hoorn JW, Pieterman EJ, *et al.* Alirocumab inhibits atherosclerosis, improves the plaque morphology, and enhances the effects of a statin. *J Lipid Res*. 2014;55:2103-12.
18. Sahebkar A, Di Giosia P, Stamerra CA, *et al.* Effect of monoclonal antibodies to PCSK9 on high-sensitivity C-reactive protein levels: a meta-analysis of 16 randomized controlled treatment arms. *Br J Clin Pharmacol*. 2016;81:1175-90.
19. Gencer B, Montecucco F, Nanchen D, *et al.* Prognostic value of PCSK9 levels in patients with acute coronary syndromes. *Eur Heart J*. 2016;37:546-53.
20. Kastelein JJ, Nissen SE, Rader DJ, *et al.* Safety and efficacy of LY3015014, a monoclonal antibody to proprotein convertase subtilisin/kexin type 9 (PCSK9): a randomized, placebo-controlled Phase 2 study. *Eur Heart J*. 2016;37:1360-9.
21. Moher D, Shamseer L, Clarke M, *et al.* Preferred reporting items for systematic review and meta-analysis protocols (PRISMA-P) 2015 statement. *Syst Rev*. 2015;4:1.

- 1  
2  
3 22. Raal F, Scott R, Somaratne R, *et al.* Low-density lipoprotein cholesterol-lowering  
4 effects of AMG 145, a monoclonal antibody to proprotein convertase subtilisin/kexin  
5 type 9 serine protease in patients with heterozygous familial hypercholesterolemia:  
6 the Reduction of LDL-C with PCSK9 Inhibition in Heterozygous Familial  
7 Hypercholesterolemia Disorder (RUTHERFORD) randomized trial. *Circulation.*  
8 2012;126:2408-17.  
9  
10  
11  
12  
13  
14  
15  
16 23. Raal FJ, Stein EA, Dufour R, *et al.* PCSK9 inhibition with evolocumab (AMG 145) in  
17 heterozygous familial hypercholesterolaemia (RUTHERFORD-2): a randomised,  
18 double-blind, placebo-controlled trial. *Lancet.* 2015;385:331-40.  
19  
20  
21  
22 24. Stein EA, Gipe D, Bergeron J, *et al.* Effect of a monoclonal antibody to PCSK9,  
23 REGN727/SAR236553, to reduce low-density lipoprotein cholesterol in patients with  
24 heterozygous familial hypercholesterolaemia on stable statin dose with or without  
25 ezetimibe therapy: a phase 2 randomised controlled trial. *Lancet.* 2012;380:29-36.  
26  
27  
28  
29  
30  
31 25. Blom DJ, Hala T, Bolognese M, *et al.* A 52-week placebo-controlled trial of  
32 evolocumab in hyperlipidemia. *N Engl J Med.* 2014;370:1809-19.  
33  
34  
35  
36 26. Stroes E, Colquhoun D, Sullivan D, *et al.* Anti-PCSK9 antibody effectively lowers  
37 cholesterol in patients with statin intolerance: the GAUSS-2 randomized,  
38 placebo-controlled phase 3 clinical trial of evolocumab. *J Am Coll Cardiol.*  
39 2014;63:2541-2548.  
40  
41  
42  
43  
44 27. Raal FJ, Honarpour N, Blom DJ, *et al.* Inhibition of PCSK9 with evolocumab in  
45 homozygous familial hypercholesterolaemia (TESLA Part B): a randomised,  
46 double-blind, placebo-controlled trial. *Lancet.* 2015;385:341-50.  
47  
48  
49  
50 28. Cannon CP, Cariou B, Blom D, *et al.* Efficacy and safety of alirocumab in high  
51 cardiovascular risk patients with inadequately controlled hypercholesterolaemia on  
52 maximally tolerated doses of statins: the ODYSSEY COMBO II randomized  
53  
54  
55  
56  
57  
58  
59  
60

- 1  
2  
3 controlled trial. *Eur Heart J*. 2015;36:1186-94.  
4  
5 29. Nicholls SJ, Puri R, Anderson T, *et al*. Effect of Evolocumab on Progression of  
6  
7 Coronary Disease in Statin-Treated Patients: The GLAGOV Randomized Clinical  
8  
9 Trial. *JAMA*. 2016;316:2373-84.  
10  
11 30. Baruch A, Mosesova S, Davis JD, *et al*. Effects of RG7652, a Monoclonal Antibody  
12  
13 Against PCSK9, on LDL-C, LDL-C Subfractions, and Inflammatory Biomarkers in  
14  
15 Patients at High Risk of or With Established Coronary Heart Disease (from the Phase  
16  
17 2 EQUATOR Study). *Am J Cardiol*. 2017;119:1576-83.  
18  
19  
20 31. Ridker PM, Cushman M, Stampfer MJ, *et al*. Inflammation, aspirin, and the risk of  
21  
22 cardiovascular disease in apparently healthy men. *N Engl J Med*. 1997; 336:973-9.  
23  
24 32. Everett BM, Pradhan AD, Solomon DH, *et al*. Rationale and design of the  
25  
26 Cardiovascular Inflammation Reduction Trial: a test of the inflammatory hypothesis  
27  
28 of atherothrombosis. *Am Heart J*. 2013;166:199-207.  
29  
30  
31 33. Rost NS, Wolf PA, Kase CS, *et al*. Plasma concentration of C-reactive protein and risk  
32  
33 of ischemic stroke and transient ischemic attack: the Framingham study. *Stroke*.  
34  
35 2001;32:2575-9.  
36  
37 34. Elkind MS, Luna JM, Moon YP, *et al*. High-sensitivity C-reactive protein predicts  
38  
39 mortality but not stroke: the Northern Manhattan Study. *Neurology*.2009;73;1300-7.  
40  
41 35. Li L, Roumeliotis N, Sawamura T, *et al*. C-reactive protein enhances LOX-1  
42  
43 expression in human aortic endothelial cells: relevance of LOX-1 to C-reactive  
44  
45 protein-induced endothelial dysfunction. *Circ Res*. 2004;95:877-83.  
46  
47  
48 36. Paffen E, DeMaat MP. C-reactive protein in atherosclerosis: A causal factor?  
49  
50 *Cardiovasc Res*. 2006;71:30-9.  
51  
52 37. Ridker PM, Danielson E, Fonseca FA, *et al*. Rosuvastatin to prevent vascular events in men  
53  
54 and women with elevated C-reactive protein. *N Engl J Med*. 2008;359:2195-207.  
55  
56  
57  
58  
59  
60

- 1  
2  
3 38. Lan H, Pang L, Smith MM, *et al.* Proprotein convertase subtilisin/kexin type 9  
4 (PCSK9) affects gene expression pathways beyond cholesterol metabolism in liver  
5 cells. *Cell Physiol.* 2010. 224(1):273-81.  
6  
7  
8  
9 39. Tavori H, Giunzioni I, Predazzi IM, *et al.* Human PCSK9 promotes hepatic  
10 lipogenesis and atherosclerosis development via apoE- and LDLR-mediated  
11 mechanisms. *Cardiovasc Res.* 2016;110:268-78.  
12  
13  
14  
15 40. Li S, Guo YL, Xu RX, *et al.* Association of plasma PCSK9 levels with white blood  
16 cell count and its subsets in patients with stable coronary artery disease.  
17 *Atherosclerosis.* 2014;234:441-445.  
18  
19  
20  
21 41. Cheng JM, Oemrawsingh RM, Garcia-Garcia HM, *et al.* PCSK9 in relation to  
22 coronary plaque inflammation: Results of the ATHEROREMO-IVUS study.  
23 *Atherosclerosis.* 2016;248:117-22.  
24  
25  
26  
27 42. Tang Z, Jiang L, Peng J, *et al.* PCSK9 siRNA suppresses the inflammatory response  
28 induced by oxLDL through inhibition of NF-kappaB activation in THP-1-derived  
29 macrophages. *Int J Mol Med.* 2012;30:931-8.  
30  
31  
32  
33 43. Tang ZH, Peng J, Ren Z, *et al.* New role of PCSK9 in atherosclerotic inflammation  
34 promotion involving the TLR4/NF-kappaB pathway. *Atherosclerosis.*  
35 2017;262:113-22.  
36  
37  
38  
39 44. Landlinger C, Pouwer MG, Juno C, *et al.* The AT04A vaccine against proprotein  
40 convertase subtilisin/kexin type 9 reduces total cholesterol, vascular inflammation,  
41 and atherosclerosis in APOE\*3Leiden.CETP mice. *Eur Heart J.* 2017;38:2499-507.  
42  
43  
44  
45 45. Bernelot Moens SJ, Neele AE, Kroon J, *et al.* PCSK9 monoclonal antibodies reverse  
46 the pro-inflammatory profile of monocytes in familial hypercholesterolaemia. *Eur*  
47 *Heart J.* 2017;38:1584-93.  
48  
49  
50  
51  
52  
53  
54  
55  
56  
57  
58  
59  
60

## Tables

**Table 1.** Study characteristics of included randomized controlled trials.

| Study                          | Year | Phase | Inclusion criteria | Patients N | Arm | Mean age (years) | Male % | Mean hs-CRP at baseline mg/L | hs-CRP reduction (mg/L) | % LDL-C reduction | Drugs/control                         | Treatment duration | Jadad Score |
|--------------------------------|------|-------|--------------------|------------|-----|------------------|--------|------------------------------|-------------------------|-------------------|---------------------------------------|--------------------|-------------|
| RUTHERFORD <sup>22</sup>       | 2012 | II    | HeFH               | 167        | (1) | 47.6             | 54.5   | 1.09±1.37                    | -0.06 ± 0.94            | 42.7              | E:350mg/PBO, Q4W                      | 12W                | 5           |
|                                |      |       |                    |            | (2) | 51.8             | 62.5   | 1.07±1.24                    | 0.00 ± 0.30             | 55.2              | E:420mg/PBO, Q4W                      |                    |             |
| Stein 2012 <sup>24</sup>       | 2012 | II    | HeFH               | 77         | (1) | 56.3             | 81.3   | 1.40±1.78                    | -0.40 ± 2.04            | 67.9              | A:150mg /PBO, Q2W                     | 12W                | 5           |
|                                |      |       |                    |            | (2) | 51.3             | 60.0   | 0.60±0.82                    | -0.20 ± 0.81            | 28.9              | A:150mg /PBO, Q4W                     |                    |             |
|                                |      |       |                    |            | (3) | 52.9             | 56.3   | 0.70±1.48                    | 0.00 ± 1.29             | 31.5              | A:200mg /PBO, Q4W                     |                    |             |
|                                |      |       |                    |            | (4) | 54.3             | 46.7   | 0.70±0.59                    | -0.10± 0.84             | 42.5              | A:300mg /PBO, Q4W                     |                    |             |
| DESCARTES <sup>25</sup>        | 2014 | II    | HC                 | 894        | (1) | 50.7             | 47.3   | 2.00±3.70                    | 0.00 ± 2.57             | 51.5              | E:420 mg/ PBO, Q4W                    | 52W                | 5           |
|                                |      |       |                    |            | (2) | 57.2             | 42.9   | 1.00±1.48                    | 0.00 ± 1.48             | 54.7              | E:420 mg+ATV10 mg/ PBO, Q4W           |                    |             |
|                                |      |       |                    |            | (3) | 57.8             | 52.4   | 1.00±1.48                    | 0.00 ± 1.48             | 46.7              | E:420 mg+ATV80 mg/ PBO, Q4W           |                    |             |
|                                |      |       |                    |            | (4) | 54.2             | 55.6   | 1.00±1.48                    | 0.00 ± 1.48             | 46.8              | E:420 mg+ATV80 mg+ Eze10mg / PBO, Q4W |                    |             |
| GAUSS-2 <sup>26</sup>          | 2014 | III   | HC                 | 307        | (1) | 61.0             | 55.3   | 1.40±2.00                    | 0.30 ± 2.67             | 56.1              | E:140 mg/ Eze, Q2W                    | 12W                | 4           |
|                                |      |       |                    |            | (2) | 63.0             | 54.9   | 1.80±1.78                    | -0.30 ± 1.78            | 52.6              | E:420 mg/ Eze, Q4W                    |                    |             |
| RUTHERFORD-2 <sup>23</sup>     | 2014 | III   | HeFH               | 329        | (1) | 52.6             | 40.0   | 0.92±1.03                    | -0.05 ± 0.39            | 61.3              | E:140 mg /PBO,Q2W                     | 12W                | 4           |
|                                |      |       |                    |            | (2) | 51.9             | 41.8   | 1.04±1.24                    | 0.03 ± 0.73             | 55.7              | E:420 mg /PBO,Q4W                     |                    |             |
| TESLA Part B <sup>27</sup>     | 2014 | III   | HoFH               | 49         |     | 31.0             | 51.5   | 0.70±1.04                    | -0.02 ± 0.52            | 23.1              | E:140 mg /PBO, Q4W                    | 12W                | 4           |
| ODYSSEY COMBO II <sup>28</sup> | 2015 | III   | HC                 | 720        | (1) | 61.7             | 75.2   | 3.58±7.78                    | -0.39 ± 6.95            | 50.6              | A: 75mg /Eze, Q2W                     | 24W                | 4           |
|                                |      |       |                    |            | (2) | 61.7             | 75.2   | 3.58±7.78                    | -0.07 ± 8.57            | 51.8              | A: 75mg /Eze, Q2W                     | 52W                |             |
| GLAGOV <sup>29</sup>           | 2016 | III   | HC                 | 968        |     | 59.8             | 72.1   | 1.60±1.93                    | -0.40 ± 10.67           | 60.8              | E:420 mg /PBO, Q4W                    | 78W                | 4           |



1  
2  
3  
4  
5  
6  
7  
8  
9  
10  
11  
12  
13  
14  
15  
16  
17  
18  
19  
20  
21  
22  
23  
24  
25  
26  
27  
28  
29  
30  
31  
32  
33  
34  
35  
36  
37  
38  
39  
40  
41  
42  
43  
44  
45  
46  
47

|                              |      |    |    |     |     |      |      |           |              |      |                    |     |   |
|------------------------------|------|----|----|-----|-----|------|------|-----------|--------------|------|--------------------|-----|---|
| Kastelein 2016 <sup>20</sup> | 2016 | II | HC | 519 | (1) | 57.2 | 51.7 | 1.03±1.41 | -0.20 ± 2.07 | 14.9 | LY:20mg/PBO, Q4W   | 16W | 4 |
|                              |      |    |    |     | (2) | 57.1 | 52.3 | 1.34±1.11 | 1.60 ± 2.00  | 40.5 | LY:120mg/PBO, Q4W  |     |   |
|                              |      |    |    |     | (3) | 59.7 | 54.7 | 1.63±1.78 | -0.30 ± 2.00 | 50.5 | LY:300mg /PBO, Q4W |     |   |
|                              |      |    |    |     | (4) | 59.6 | 58.1 | 1.39±1.70 | -0.30 ± 2.07 | 14.9 | LY:100mg /PBO, Q8W |     |   |
|                              |      |    |    |     | (5) | 58.7 | 50.6 | 1.10±1.63 | -0.70 ± 2.07 | 37.1 | LY:300mg /PBO, Q8W |     |   |
| EQUATOR <sup>30</sup>        | 2017 | II | HC | 168 | (1) | 65.0 | 57.9 | 1.60±2.70 | 0.34 ± 1.93  | 23.3 | RG:400mg/PBO, Q4W  | 24W | 4 |
|                              |      |    |    |     | (2) | 64.0 | 51.0 | 2.00±5.90 | -0.16 ± 2.92 | 44.3 | RG:800mg /PBO,Q8W  |     |   |

Data presented as mean±SD; LDL-C, low density lipoprotein-cholesterol; hs-CRP, hypersensitive C reactive protein; HC, hypercholesterolemia; HeFH, heterozygous familial hypercholesterolemia; HoFH, homozygous familial hypercholesterolemia; E, Evolocumab; A, Alirocumab; LY: LY3015014; RG, RG7652; PBO, placebo; ATV, atorvastatin; Eze, ezetimibe; W, weeks; Q2W, every 2 weeks; Q4W, every 4 weeks. N, number; SD, standard deviation.

1  
2  
3  
4 **Figure legends**  
5

6 **Figure 1.** Flow diagram of selection of studies.  
7  
8

9  
10 **Figure 2.** Forest plots depicting the effect of PCSK9-mAbs on hs-CRP.  
11

12 CI=confidence interval, PCSK9-mAb=PCSK9 monoclonal antibody, hs-CRP= hypersensitive C-reactive protein  
13  
14

15  
16 **Figure 3.** Subgroup analyses of the effect of PCSK9-mAbs on hs-CRP.  
17

18 CI=confidence interval. PCSK9-mAb=PCSK9 monoclonal antibody. hs-CRP= hypersensitive C-reactive protein.  
19

20 FH= familial hypercholesterolemia. non-FH= non-familial hypercholesterolemia.  
21  
22  
23  
24  
25  
26  
27  
28  
29  
30  
31  
32  
33  
34  
35  
36  
37  
38  
39  
40  
41  
42  
43  
44  
45  
46  
47  
48  
49  
50  
51  
52  
53  
54  
55  
56  
57  
58  
59  
60

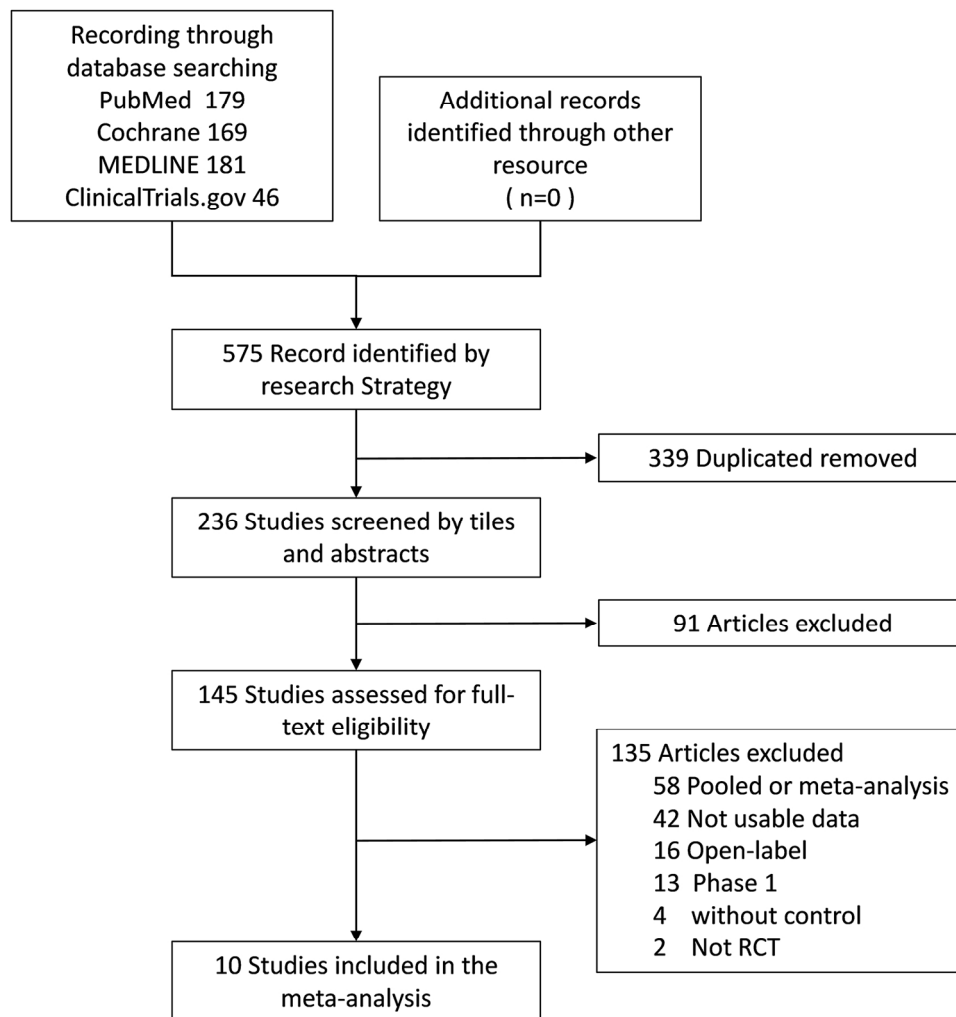

Figure 1. Flow diagram of selection of studies.

153x159mm (300 x 300 DPI)



Figure 2. Forest plots depicting the effect of PCSK9-mAbs on hs-CRP. CI=confidence interval, PCSK9-mAbs=PCSK9 monoclonal antibodies, hs-CRP= hypersensitive C-reactive protein

238x213mm (300 x 300 DPI)





Figure 3. Subgroup analyses of the effect of PCSK9-mAbs on hs-CRP.  
 CI=confidence interval. PCSK9-mAb=PCSK9 monoclonal antibody. hs-CRP= hypersensitive C-reactive protein. FH= familial hypercholesterolemia. non-FH= non-familial hypercholesterolemia.

256x133mm (300 x 300 DPI)

## Supplementary material

### Appendix 1. The search string

#### Medline via Ovid

- 1.exp AMG 145/
- 2.exp Evolocumab/
- 3.exp REGN727/
- 4.exp SAR236553/
- 5.exp Alirocumab/
- 6.exp RN316/
- 7.exp Bococizumab/
- 8.exp RG7652/
- 9.exp LY3015014/
- 10.exp ALN-PCSS/
- 11.exp PCSK9 antibodies/
- 12.exp anti-PCSK9/
- 13.exp Clinical Trial/
- 14.exp Randomized Controlled Trial/
- 15.exp Controlled Clinical Trial/
- 16.exp Random Allocation/
- 17.1 OR 2 OR 3 OR 4 OR 5 OR 6 OR 7 OR 8 OR 9 OR 10 OR 11 OR 12
- 18.13 OR 14 OR 15 OR 16
- 19.17 AND 18
20. limit 19 to (humans)

#### Pubmed

"amg145"[Title/Abstract]) OR "Evolocumab"[Title/Abstract]) OR "REGN727"[Title/Abstract])  
OR "SAR236553"[Title/Abstract]) OR "Alirocumab"[Title/Abstract]) OR "RN316"[Title/  
Abstract]) OR "bococizumab"[Title/Abstract]) OR "RG7652"[Title/Abstract]) OR "LY3015014"  
[Title/Abstract]) OR "ALN-PCSSC"[Title/Abstract]) OR "PCSK9 antibodies"[Title/Abstract]) OR  
"anti-PCSK9"[Title/ Abstract]) AND randomized controlled trial[Publication Type]) AND  
"humans"[MeSH Terms]

1  
2  
3  
4  
5  
6  
7  
8  
9  
10  
11  
12  
13  
14  
15  
16  
17  
18  
19  
20  
21  
22  
23  
24  
25  
26  
27  
28  
29  
30  
31  
32  
33  
34  
35  
36  
37  
38  
39  
40  
41  
42  
43  
44  
45  
46  
47

**Supplemental Table 1.** Quality assessment of included studies using the Jadad scale

| Studies          | Representation of randomization | Appropriateness of method for randomization | Representation of double blinding | Appropriateness of method for double blinding | Representation of withdrawals | Total Score |
|------------------|---------------------------------|---------------------------------------------|-----------------------------------|-----------------------------------------------|-------------------------------|-------------|
| RUTHERFORD       | 1                               | 1                                           | 1                                 | 1                                             | 1                             | 5           |
| Stein EA 2012    | 1                               | 1                                           | 1                                 | 1                                             | 1                             | 5           |
| DESCARTES        | 1                               | 1                                           | 1                                 | 1                                             | 1                             | 5           |
| GAUSS-2          | 1                               | 1                                           | 1                                 | 0                                             | 1                             | 5           |
| RUTHERFORD-2     | 1                               | 1                                           | 1                                 | 0                                             | 1                             | 4           |
| TESLA Part B     | 1                               | 1                                           | 1                                 | 0                                             | 1                             | 4           |
| ODYSSEY COMBO II | 1                               | 1                                           | 1                                 | 0                                             | 1                             | 4           |
| GLAGOV           | 1                               | 1                                           | 1                                 | 0                                             | 1                             | 4           |
| Kastelein 2016   | 1                               | 1                                           | 1                                 | 0                                             | 1                             | 4           |
| EQUATOR          | 1                               | 1                                           | 1                                 | 0                                             | 1                             | 4           |

**Representation of randomization:**0, not randomized or inappropriate method of randomization; 1, the study was described as randomized.  
**Appropriateness of method for randomization:** 0, no information about the method of randomization;1, the method of randomization was described and it was appropriate.  
**Representation of double blinding:** 0, no blind or inappropriate method of blinding; 1, the study was described as double blinding.  
**Appropriateness of method for double blinding:** 0, no information about the method of double blinding;1, the method of double blinding was described and it was appropriate.  
**Withdrawals and dropouts:**0, not describe the follow-up; 1, a description of withdrawals and dropouts.

Supplementary Figure 1. Evaluation of risk of bias in the studies.

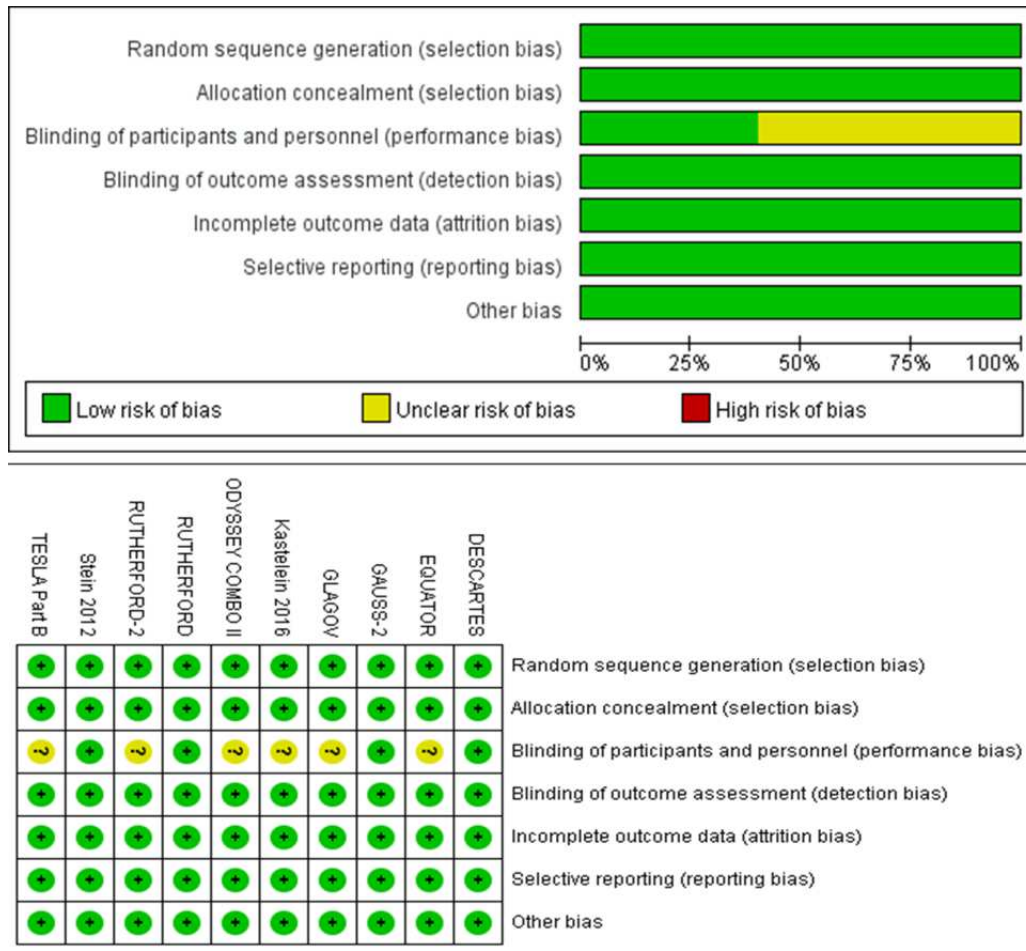



Supplementary Figure 2. Pooled analysis for hs-CRP stratified by PCSK9-mAb types.

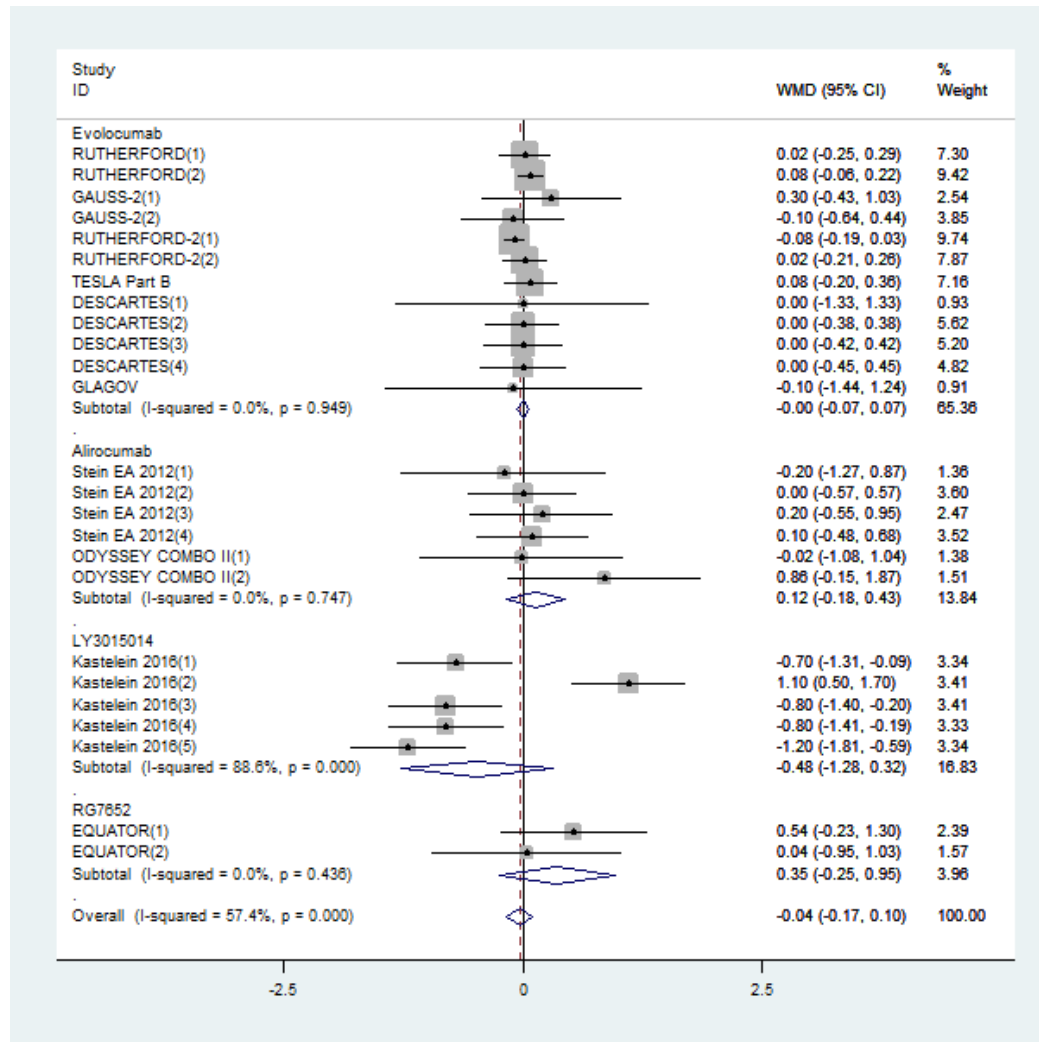

WMD= weighted mean difference, CI = confidence interval, PCSK9-mAb= proprotein convertase subtilisin/kexin type 9 monoclonal antibody, hs-CRP=hypersensitive C-reactive protein

Supplementary Figure 3. Pooled analysis for hs-CRP stratified by treatment durations.

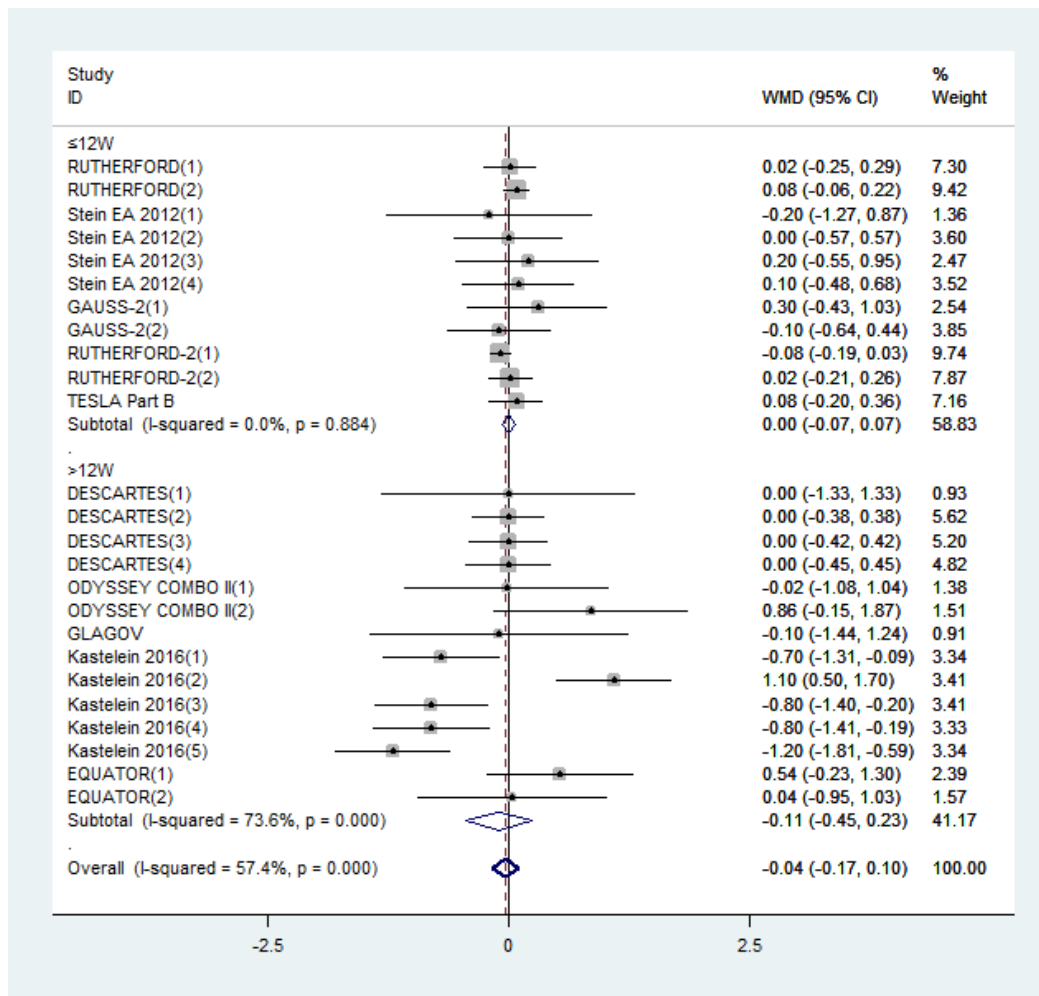

WMD=weighted mean difference, CI = confidence interval, hs-CRP=hypersensitive C-reactive protein

Supplementary Figure 4. Pooled analysis for hs-CRP stratified by participant characteristics

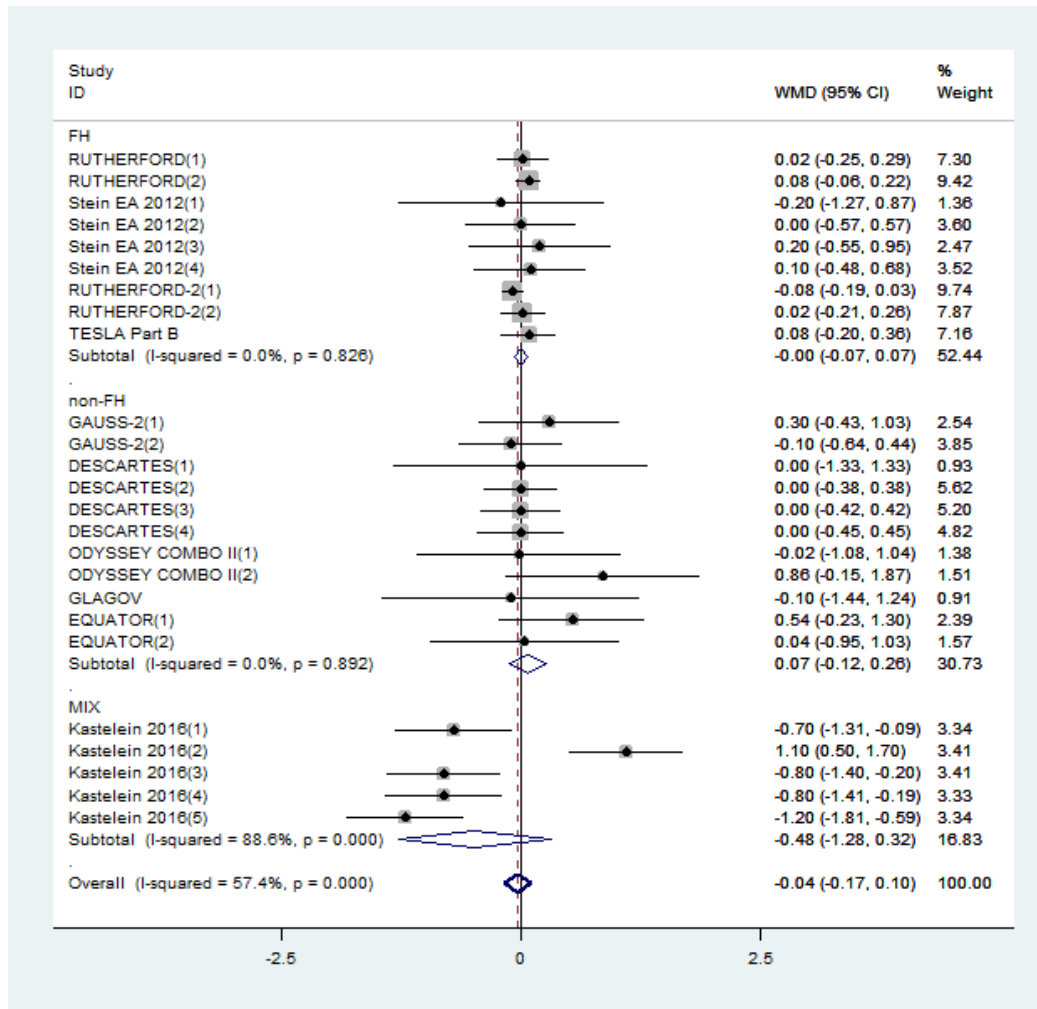

WMD= weighted mean difference, CI = confidence interval, hs-CRP=hypersensitive C-reactive protein,

FH=familial hypercholesterolemia, non-FH= non-familial hypercholesterolemia

Supplementary Figure 5. Pooled analysis for hs-CRP stratified by of treatment methods.

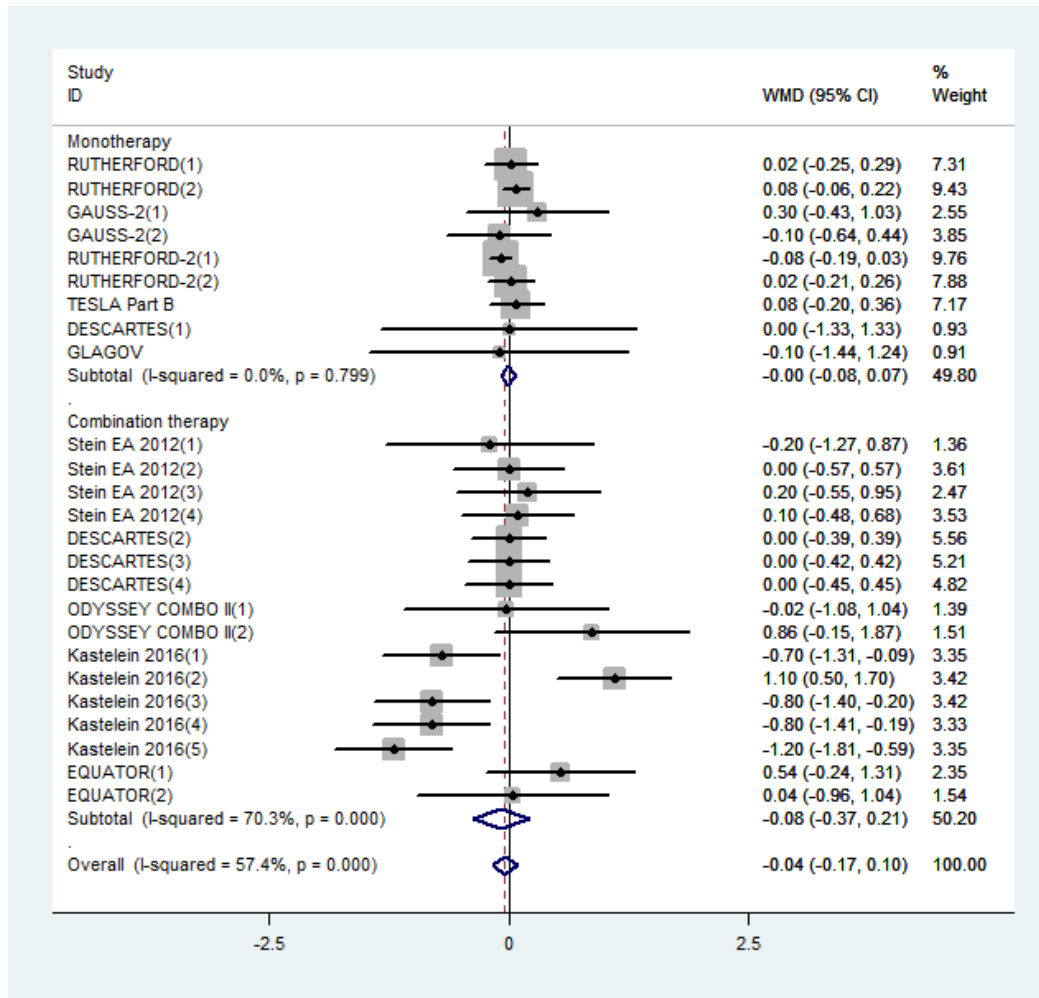

WMD=weighted mean difference, CI = confidence interval, hs-CRP=hypersensitive C-reactive protein

Supplementary Figure 6. Sensitivity analyses of hs-CRP.

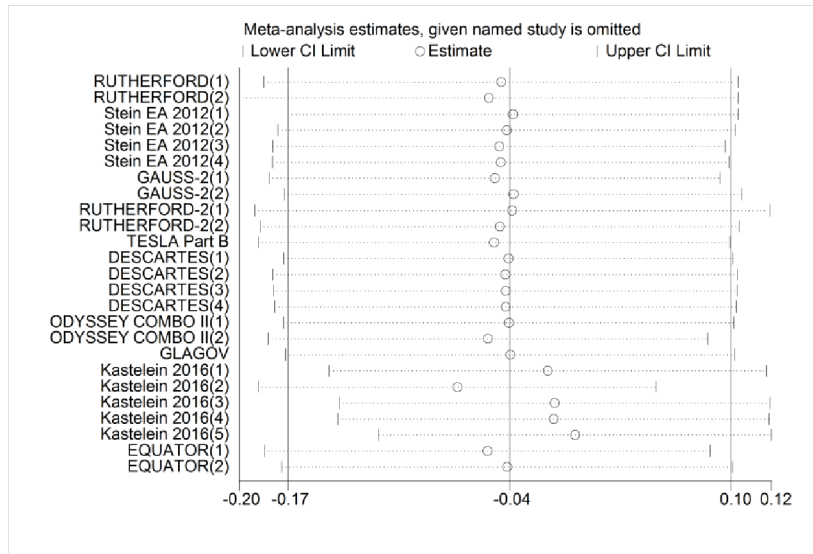

hs-CRP=hypersensitive C-reactive protein

Supplementary Figure 7. Funnel Plots of included studies

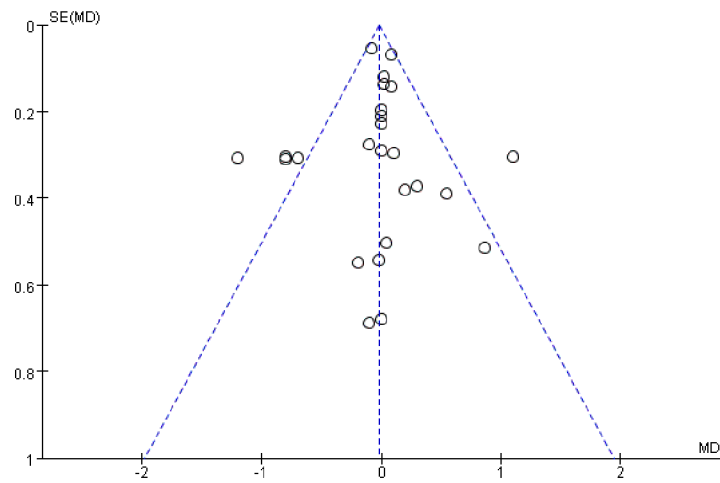

Supplementary Figure 8. Meta-regression of baseline age (A), sex (B) and percent change of LDL-C (C).

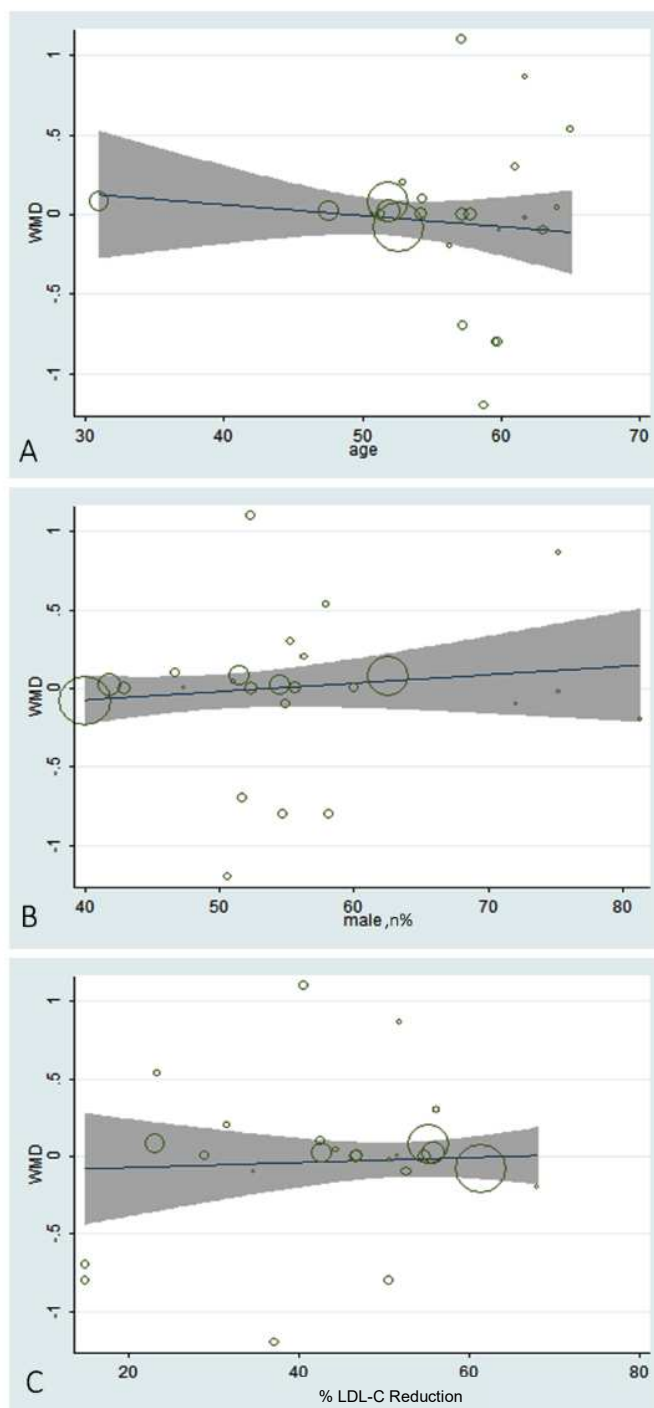

LDL-C=low density lipoprotein cholesterol
